# Supplementary material for: Tuning the solubility of ionophores: glutathione-mediated transport of chloride ions across hydrophobic membranes
Source: Royal Society of Chemistry journal article supplement (doi:10.1039/c9cc04518j), 2019-01-01
Supplement: c9cc04518j1.pdf [file c9cc04518j1.pdf]

## **Tuning the Solubility of Ionophores: Glutathione-Mediated Transport of Chloride Ions across Hydrophobic Membranes**

Nasim Akhtar,<sup>a</sup> Nirmalya Pradhan,<sup>a</sup> Abhishek Saha,<sup>a</sup> Vishnu Kumar,<sup>b</sup> Oindrila Biswas,<sup>a</sup> Subhasis Dey,<sup>a</sup> Manisha Shah,<sup>b</sup> Sachin Kumar,<sup>b</sup> and Debasis Manna <sup>\*a</sup>

<sup>a</sup>Department of Chemistry and <sup>b</sup>Department of Bioscience and Bioengineering, Indian Institute of Technology Guwahati, Guwahati, Assam 781039, India

Email: [dmanna@iitg.ac.in](mailto:dmanna@iitg.ac.in)

### ***Supporting Information***

| Sl. No. | Contents                                                                      | Page No. |
|---------|-------------------------------------------------------------------------------|----------|
| 1       | General information                                                           | S3       |
| 2       | Synthesis of the compounds                                                    | S3-8     |
| 3       | Characterization of the synthesized compounds                                 | S8-12    |
| 4       | Chemical properties of the compounds                                          | S13      |
| 5       | <sup>1</sup> H-NMR titrations                                                 | S13-18   |
| 6       | Crystallographic study                                                        | S18-20   |
| 7       | Ion transport activity studies                                                | S21-25   |
| 8       | Ion selectivity studies using HPTS assay with applied pH gradient             | S25-30   |
| 9       | Evidence for the mechanistic pathway for chloride ion transport               | S27-30   |
| 10      | Evidence of vesicle stability in presence of the compounds                    | S30-32   |
| 11      | Regeneration of the active transporter by dealkylation of the proanionophores | S32-37   |
| 12      | Biological activities of the compounds                                        | S37-43   |
| 13      | Regeneration of anionophore from proanionophore under cellular environments   | S43-46   |
| 14      | NMR- Spectra of the synthesized compounds                                     | S47-57   |
| 15      | ES-MS Spectra of the synthesized compounds                                    | S58-60   |
| 16      | MALDI-TOF analysis of compounds                                               | S61-62   |
| 17      | References                                                                    | S63      |

## 1. General Information:

All the reagents and solvents were purchased from commercial sources like Sigma-Aldrich, Alfa Aesar, Merck and directly used without further purification, unless otherwise stated. Thin-layer chromatography (TLC) on silica gel 60 F254 (0.25 mm) was used to monitor the reactions. The column chromatography was performed using the silica gel of 120-200 mesh. The  $^1\text{H}$  NMR and  $^{13}\text{C}$  NMR were recorded at 400 and 100 MHz respectively by Bruker spectrometer. The chemical shifts were reported in parts per million ( $\delta$ ) using DMSO- $d_6$ ,  $\text{CDCl}_3$  as internal solvent. The coupling constant ( $J$ ) values were reported in hertz and the abbreviation were stated as follows: s (singlet), d (doublet), t (triplet), q (quartet), m (multiple), and br (broadened). The high-resolution mass spectra (HRMS) were recorded at Agilent Q-TOF mass spectrometer with Z-spray source using built-in software for the analysis of the recorded mass data. Egg yolk phosphatidylcholine (EYPC) and cholesterol were purchased from Sigma Aldrich. Dipalmitoylphosphatidylcholine (DPPC) was purchased from Avanti Polar Lipids. HEPES buffer, 8-hydroxypyrene-1, 3, 6-trisulfonic acid (HPTS), lucigenin, calcein, Triton X-100 and inorganic salts and their corresponding hydroxide bases were also purchased from Sigma Aldrich. Ultrapure water (Milli-Q system, Millipore, Billerica, MA) was used for the preparation of all the buffers. The stock solutions of compounds were prepared in gas chromatographic grade DMSO which also purchased from Sigma.

## 2. Synthesis of the Compounds:

**2.1. Synthesis of 1-isothiocyanato-2-(methylthio)ethane<sup>1</sup>** — To a stirring solution of 2-(methylthio)ethan-1-amine (830 mg, 7.90 mmol) in chloroform (10 mL) and water (10 mL) at 0 °C was added a solution of thiophosgene (0.9 ml, 11.86 mmol) and NaOH (948 mg, 23.7

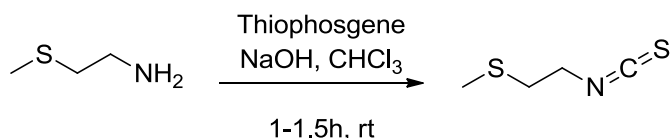

**Scheme 1.** Synthesis of 1-isothiocyanato-2-(methylthio)ethane.

mmol) in chloroform (10 mL). After 10 minutes the reaction mixture was allowed to warm up to room temperature and the stirring was continued for 1-1.5 hours. The progress of reaction was monitored by TLC analysis. After completion of the reaction, the organic layer was extracted with chloroform ( $2 \times 50$  mL). The combined organic layers were dried over anhydrous  $\text{Na}_2\text{SO}_4$  and concentrated under reduced pressure. The crude reaction mixture was

purified through the column chromatography with a solvent gradient system using methanol/chloroform to give a light yellow liquid compound with 70% yield.

**2.2. Synthesis of 1, 3, 5-triethyl-2, 4, 6-tris(isothiocyanatomethyl)benzene<sup>1-3</sup>** — To a stirring solution of 1,3,5-tris(bromomethyl)-2,4,6-triethylbenzene (200 mg, 0.45 mmol) in dry DMF solvent, were added tetrabutyl ammonium bromide (585 mg, 1.81 mmol), potassium thiocyanate (308 mg, 3.17 mmol) and sodium iodide (55 mg, 0.36 mmol) at room temperature

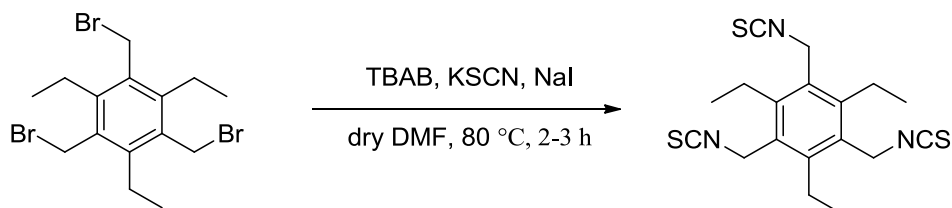

**Scheme 2.** Synthesis of 1, 3, 5-triethyl-2, 4, 6-tris(isothiocyanatomethyl)benzene.

under N<sub>2</sub> atmosphere. Then the reaction mixture was continued to stir for 2-3 hours at 80 °C temperature. The progress of reaction was monitored by TLC analysis. After completion of the reaction the unwanted salts were filtered through the filter paper. The filtrate was diluted with water (50 mL) and the organic layer was extracted with ethyl acetate (2 × 50 mL). The combined organic layers was dried over anhydrous Na<sub>2</sub>SO<sub>4</sub> and concentrated under reduced pressure. The crude reaction mixture was purified through the column chromatography with a solvent gradient system using ethyl acetate/hexane to give a white solid compound with 60% yield.

**2.3. Synthesis of *N*-(2-aminoethyl)-7-nitrobenzo[*c*][1,2,5]oxadiazol-4-amine<sup>4</sup>** — To a stirring solution of NBD-Cl (250 mg, 1.252 mmol) in CH<sub>2</sub>Cl<sub>2</sub> was added *N*-Boc-1,2-diaminoethane (221 mg, 1.378 mmol) and triethylamine (2 mL, 1.378 mmol) in CH<sub>2</sub>Cl<sub>2</sub> (10 mL). The resulting dark-brown colour solution was continued to stirred until the disappearance of the

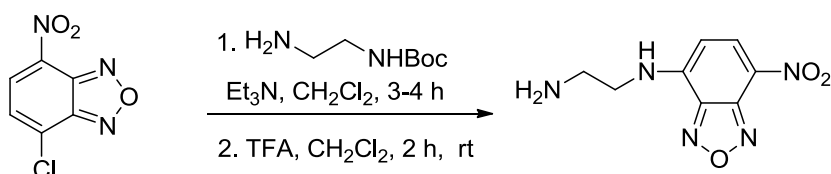

**Scheme 3.** Synthesis of *N*-(2-aminoethyl)-7-nitrobenzo[*c*][1,2,5]oxadiazol-4-amine.

starting materials. The progress of the reaction was monitored by the TLC analysis. After completion of the reaction, the reaction mixture was diluted with  $\text{CH}_2\text{Cl}_2$  (10 mL) and the organic layer was washed with  $\text{NaHCO}_3$  solution in water ( $2 \times 10$  mL). The collected organic layers were dried over the anhydrous  $\text{Na}_2\text{SO}_4$ , filtered and concentrated under reduced pressure. Then, the crude reaction mixture was dissolved in  $\text{CH}_2\text{Cl}_2$  (5 mL) and 30% trifluoroacetic acid solution in  $\text{CH}_2\text{Cl}_2$  (2 mL, 1:9 (v/v)) was slowly added at room temperature. After 2 hours, diethyl ether (30 mL) was added and the precipitated product was collected through filtration, washed with cold diethyl ether to give the brown colour product with 70% yield.

**2.4. Synthesis of bis(thiourea) derivatives** – To a stirring solution of 1, 3-phenylenedimethanamine (100 mg, 0.734 mmol) or 1, 2-diphenylethane-1, 2-diamine (100 mg, 0.4710 mmol) in  $\text{CH}_2\text{Cl}_2$  (15 mL) was added a solution of 1-isothiocyanato-2-(methylthio)ethane (1.615 mmol for compound **1** and 1.036 mmol for **2**) in  $\text{CH}_2\text{Cl}_2$  and the

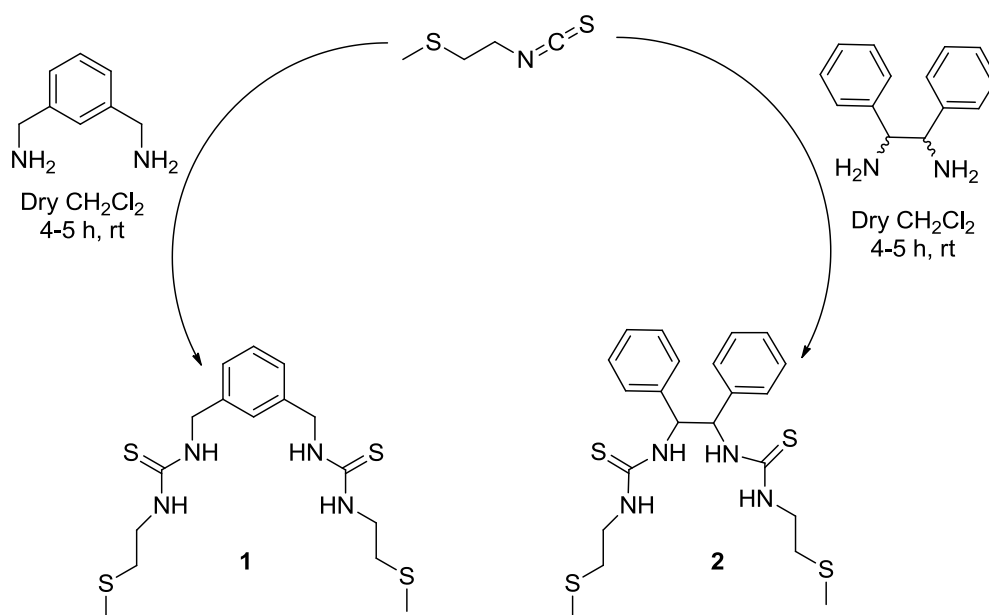

**Scheme 4.** Synthesis of bis(thiourea) derivatives.

whole reaction mixture was allowed to stir for 4-5 hours at room temperature. The progress of the reaction was monitored by TLC analysis. After completion of the reaction, mixture was diluted with water and extracted with ethyl acetate. The organic layer was washed with brine solution and dried over anhydrous  $\text{Na}_2\text{SO}_4$ . The organic solvent was removed under reduced pressure. The crude reaction mixture was purified through the column chromatography with a

solvent gradient system using MeOH/ CH<sub>2</sub>Cl<sub>2</sub> to give the targeted compounds **1** and **2** with 70 and 75% yield respectively.

**2.5. Synthesis of tris(thiourea) derivatives<sup>3</sup>** – To a stirring solution of *N*<sup>1</sup>-(7-nitrobenzo[c][1,2,5]oxadiazol-4-yl)ethane-1,2-diamine (62 mg, 0.266 mmol) in CH<sub>3</sub>CN and/or 2-(methylthio)ethan-1-amine (97 mg, 1.065 mmol for compound **3** or 46 mg, 0.5054

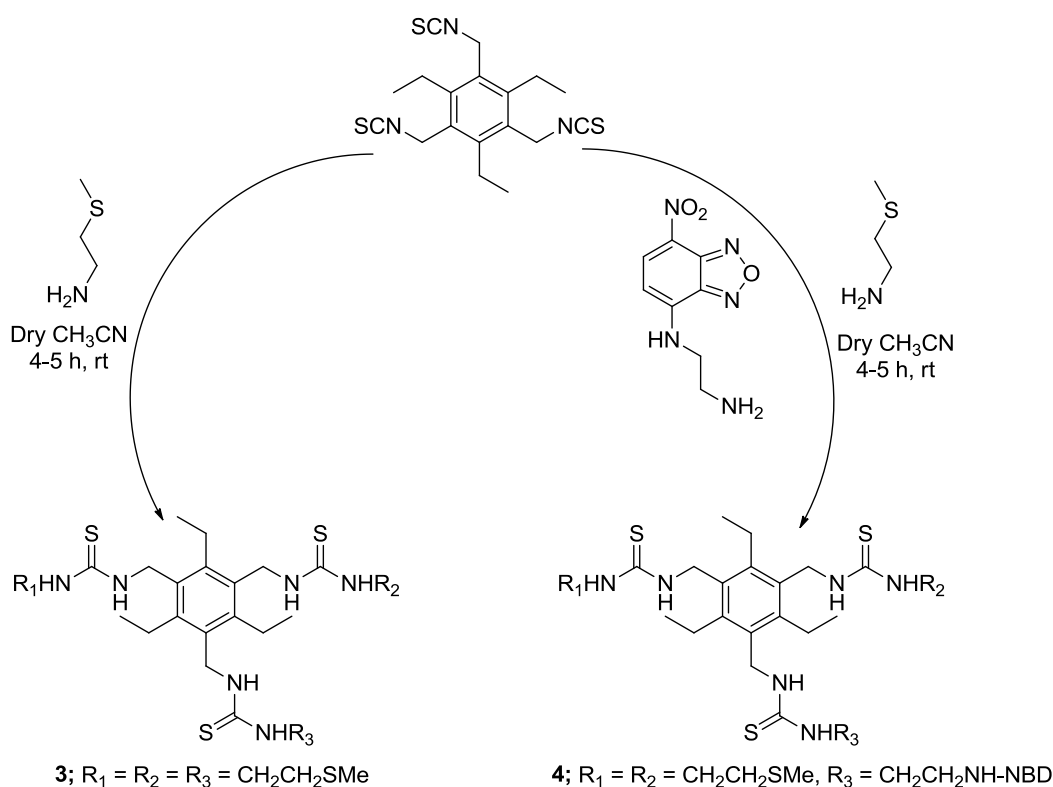

**Scheme 5.** Synthesis of tris(thiourea) derivatives.

mmol for compound **4**) was added a solution of 1,3,5-triethyl-2,4,6-tris(isothiocyanatomethyl)benzene (100 mg, 0.266 mmol for both compounds **3** and **4**) in CH<sub>3</sub>CN. The reaction mixture was then allowed to stir for 4-5 hours at room temperature. The progress of the reaction was monitored by the TLC analysis. A white precipitation was observed (for the compound **3**) and the precipitate was filtered and washed with CH<sub>2</sub>Cl<sub>2</sub> and CH<sub>3</sub>CN to get the pure compound **3** as white solid with 90% yield. However, there was no precipitation for compound **4**. After completion of the reaction, the reaction mixture was diluted with water and extracted with ethyl acetate. The organic layer was washed with brine solution and dried over anhydrous Na<sub>2</sub>SO<sub>4</sub>. The organic solvent was removed under reduced pressure and the purification was done by the column chromatography using a gradient

solvent system of MeOH/CH<sub>2</sub>Cl<sub>2</sub>. The targeted compound **4** was obtained as white solid with 50% yield.

**2.6. Synthesis of sulfonium derivatives<sup>5</sup>** — To a stirring solution of 1,1',1''-((2,4,6-triethylbenzene-1,3,5-triyl)tris(methylene))tris(3-(2-(methylthio)ethyl)thiourea) (compound **3**; 1 equiv.) in CH<sub>3</sub>CN was added a solution of iodomethane (3.2 equiv. for compound **5** and **6**) or 4-(bromomethyl)benzoic acid (3.2 equiv. for compound **7**) in CH<sub>3</sub>CN. To this reaction mixture a trace amount of dry DMF was added and the mixture was heated (at 40-50 °C) to

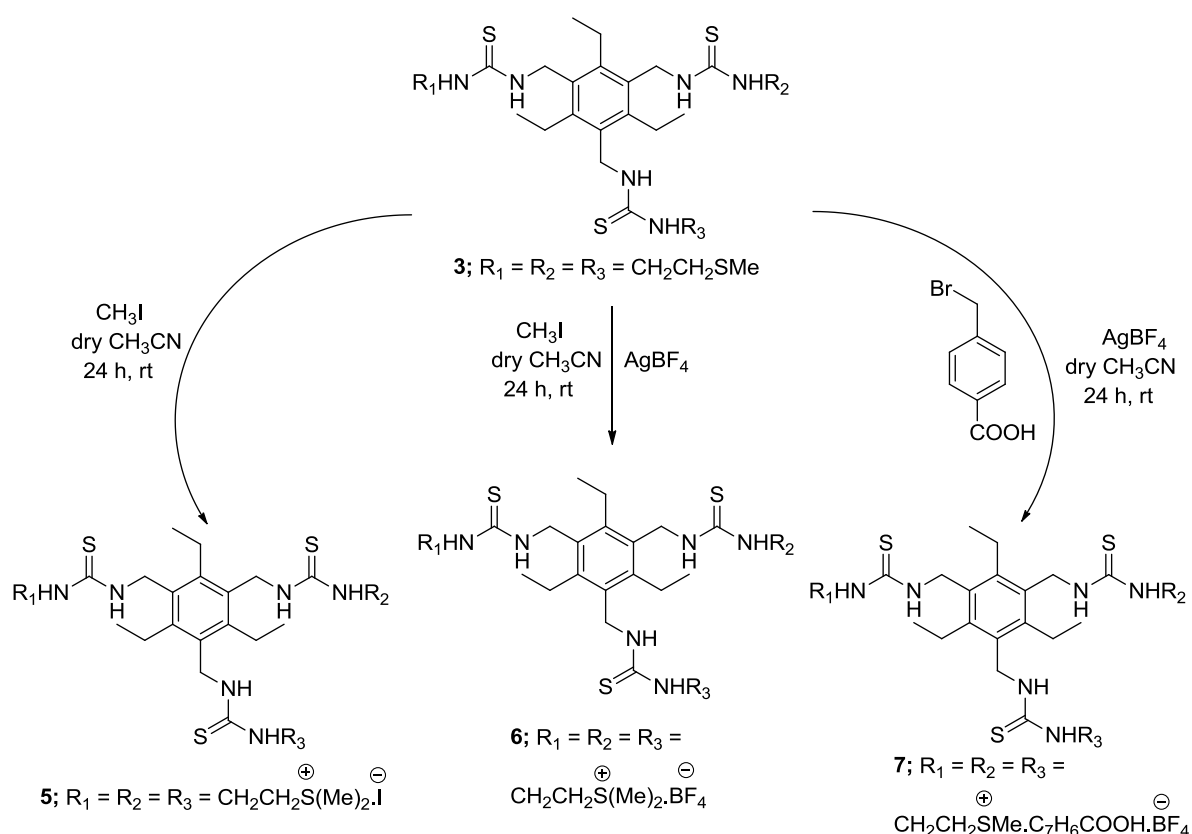

**Scheme 6.** Synthesis of sulphonium based compound.

solubilize the whole reaction mixture, and was allowed to stir for 24 hours at room temperature. For the synthesis of the compound **6** and **7**, 20 mol% of AgBF<sub>4</sub> were also added to prepare their respective tetrafluoroborate salts for making them as a better water soluble compounds. The progress of the reaction was monitored by TLC analysis. The precipitation due to the silver salt was filtered and the filtrate part was washed with diethyl ether, CH<sub>2</sub>Cl<sub>2</sub> and CH<sub>3</sub>CN to obtain the pure product **6** and **7** as sticky liquid with 60% and 70% yields, respectively. As AgBF<sub>4</sub> was not used for the preparation of compound **5**, so there was not any precipitation under the experimental conditions and after the completion of the reaction, the

reaction mixture was simply washed with the diethyl ether, CH<sub>2</sub>Cl<sub>2</sub> and CH<sub>3</sub>CN to get the pure product as sticky liquid with 90% yield.

**2.7. Synthesis of NBD-labeled sulfonium derivatives<sup>5, 6</sup>** – To a stirring solution of compound **4** in CH<sub>3</sub>CN (10 mL) was added a solution of iodomethane in CH<sub>3</sub>CN and the whole reaction mixture was allowed to stir for 24 hours at room temperature. After completion of the

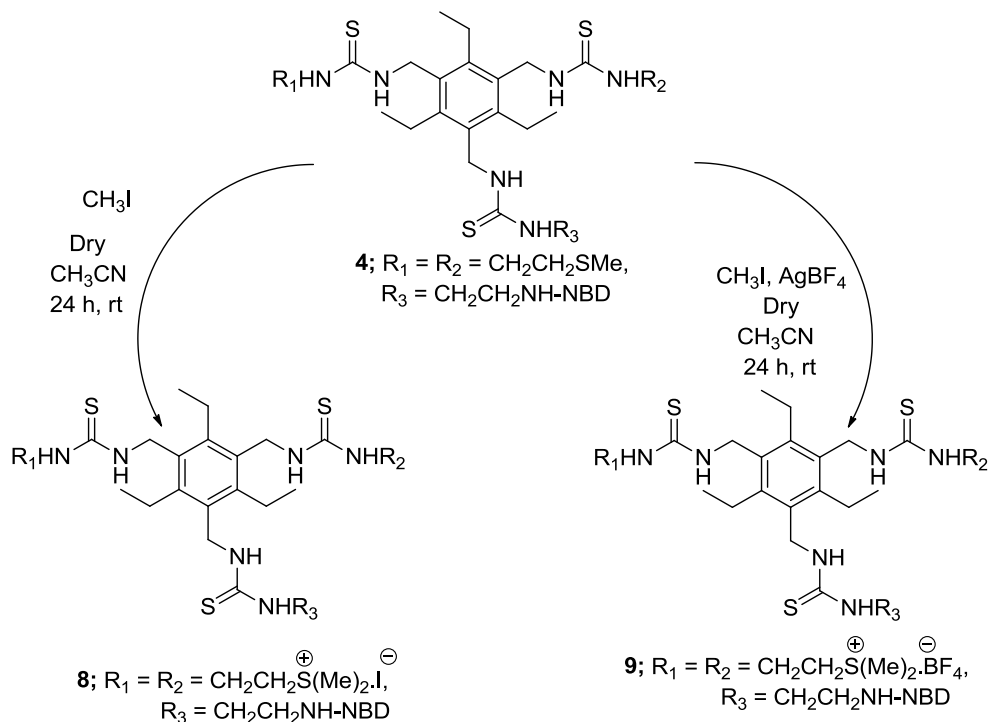

**Scheme 7.** Synthesis of NBD-labeled sulfonium derivatives.

reaction the reaction mixture was washed with diethyl ether, CH<sub>2</sub>Cl<sub>2</sub> and CH<sub>3</sub>CN to obtain a sticky compound **8** with 90% yield. For the synthesis of the compound **9**, 20 mol% of AgBF<sub>4</sub> was added to the solution of compound **4** in CH<sub>3</sub>CN. The precipitate due to the presence of excess silver salt was filtered off and the filtrate part was washed with diethyl ether, CH<sub>2</sub>Cl<sub>2</sub> and CH<sub>3</sub>CN to get the pure product **9** as sticky compounds with 50% yield.

### 3. Characterization of the Synthesized Compounds:

**3.1. 1,3,5-triethyl-2,4,6-tris(isothiocyanatomethyl)benzene** – Following the general

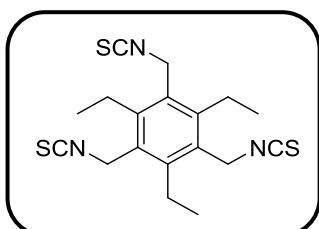

procedure as mentioned in section 2.2, using 1,3,5-tris(bromomethyl)-2,4,6-triethylbenzene (200 mg, 0.45 mmol), tetrabutyl ammonium bromide (585 mg, 1.81 mmol), potassium



thiocyanate (308 mg, 3.17 mmol) and the sodium iodide(55 mg, 0.36 mmol) provided the colourless solid compound as 70% yield. The product was characterized by the ES-MS,  $^1\text{H}$  NMR and  $^{13}\text{C}$  NMR analyses.  $^1\text{H}$  NMR (600 MHz,  $\text{CDCl}_3$ )  $\delta$  4.68 (s, 6H), 2.79 (q,  $J = 7.7$  Hz, 6H), 1.21 (t,  $J = 7.7$  Hz, 9H).  $^{13}\text{C}$  NMR (151 MHz,  $\text{CDCl}_3$ )  $\delta$  144.1, 132.1, 129.9, 42.8, 23.1, 15.7. **ES-MS (ESI+)**  $m/z$ : 376.098. **HRMS (ESI)** calcd. for  $\text{C}_{18}\text{H}_{21}\text{N}_3\text{S}_3$  ( $\text{M} + \text{H}$ ) $^+$ : 376.0970, found: 376.0981.

**3.2.  $N^1$ -(7-nitrobenzo[*c*][1,2,5]oxadiazol-4-yl)ethane-1,2-diamine<sup>4</sup>** – This compound was synthesized according to the reported procedure using NBD-Cl (250 mg, 1.252 mmol) in  $\text{CH}_2\text{Cl}_2$  and N-Boc-1,2-diaminoethane (221 mg, 1.378 mmol). All the characterization data were matched with the reported literature.

**3.3. 1,1'-(1,3-phenylenebis(methylene))bis(3-(2-(methylthio)ethyl)thiourea)(1)** – Following

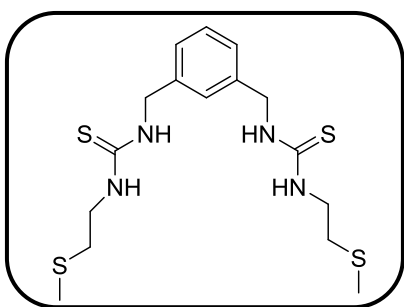

the general procedure as mentioned in section 2.4, using 1,3-phenylenedimethanamine (100mg, 0.734 mmol) and (2-isothiocyanatoethyl)(methyl)sulfane (215 mg, 1.615 mmol) provided the colorless solid compound as 70% yield. The product was characterized by the ES-MS,  $^1\text{H}$  NMR and  $^{13}\text{C}$  NMR analyses.  $^1\text{H}$  NMR (600 MHz,

**DMSO- $d_6$** )  $\delta$  7.97 (s, 2H), 7.60 (s, 2H), 7.29 (t,  $J = 7.5$  Hz, 1H), 7.19 – 7.16 (m, 3H), 4.64 (s, 4H), 3.62 (s, 4H), 2.63 (t,  $J = 7.0$  Hz, 4H), 2.08 (s, 6H).  $^{13}\text{C}$  NMR (151 MHz, **DMSO- $d_6$** )  $\delta$  183.6, 139.8, 128.7, 126.7, 126.3, 47.5, 43.3, 32.9, 15.1. **ES-MS (ESI+)**  $m/z$ : 403.1119. **HRMS (ESI)** calcd. for  $\text{C}_{16}\text{H}_{26}\text{N}_4\text{S}_4$  ( $\text{M} + \text{H}$ ) $^+$ : 403.1113, found: 403.1119.

**3.4. 1,1'-(1,2-diphenylethane-1,2-diyl)bis(3-(2-(methylthio)ethyl)thiourea) (2)** – Following

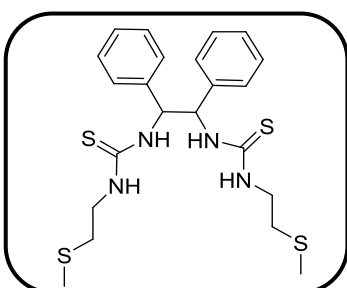

the general procedure as mentioned in section 2.4, using 1,2-diphenylethane-1,2-diamine (100 mg, 0.471 mmol) and (2-isothiocyanatoethyl)(methyl)sulfane (138 mg, 1.036 mmol) provided the brownish solid compound as 75% yield. The product was characterized by the ES-MS,  $^1\text{H}$  NMR and  $^{13}\text{C}$  NMR analyses.  $^1\text{H}$  NMR (600 MHz, **DMSO- $d_6$** )  $\delta$  7.91 (brs,

2H), 7.61 (brs, 2H), 7.29-7.27 (m, 6H), 7.24-7.22 (m, 4H), 6.03 (brs, 2H), 3.51 (brs, 4H), 2.01 (s, 6H).  $^{13}\text{C}$  NMR (151 MHz, **DMSO- $d_6$** )  $\delta$  182.9, 157.6, 140.4, 128.3, 128.0, 127.5,

61.1, 43.2, 32.7, 15.0. **ES-MS (ESI+) m/z:** 479.1429. **HRMS (ESI)** calcd. for C<sub>22</sub>H<sub>30</sub>N<sub>4</sub>S<sub>4</sub> (M+ H)<sup>+</sup>: 479.1426, found: 479.1429.

**3.5.** **1,1',1''-((2,4,6-triethylbenzene-1,3,5-triyl)tris(methylene))tris(3-(2-(methylthio)ethyl)thiourea)(3)** — Following the general procedure as mentioned in section 2.5, using 1,3,5-triethyl-2,4,6-tris(isothiocyanatomethyl)benzene (100 mg, 0.266 mmol) and

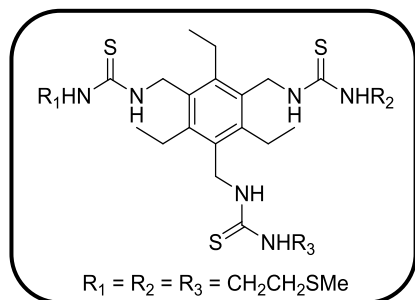

2-(methylthio)ethan-1-amine (97 mg, 1.065 mmol) provided the white solid compound as 90% yield. The compound was simply purified by the washing with the CH<sub>3</sub>CN and DCM solvent. The product was characterized by the ES-MS, <sup>1</sup>H NMR and <sup>13</sup>C NMR analyses. **<sup>1</sup>H NMR (600 MHz, DMSO-*d*<sub>6</sub>)** δ 7.40 (brs, 6H), 4.61 (s, 6H), 3.64-

3.61 (s, 6H), 2.67-2.61 (m, 12H), 2.08 (s, 9H), 1.11 (t, *J* = 7.4 Hz, 9H). **<sup>13</sup>C NMR (151 MHz, DMSO-*d*<sub>6</sub>)** δ 182.6, 143.9, 132.7, 43.0, 42.5, 32.9, 23.2, 16.8, 14.9. **ES-MS (ESI+) m/z:** 649.2336. **HRMS (ESI)** calcd. for C<sub>27</sub>H<sub>48</sub>N<sub>6</sub>S<sub>6</sub> (M+ H)<sup>+</sup>: 649.2337, found: 649.2336.

**3.6. Compound 4** — Following the general procedure as mentioned in section 2.5, using

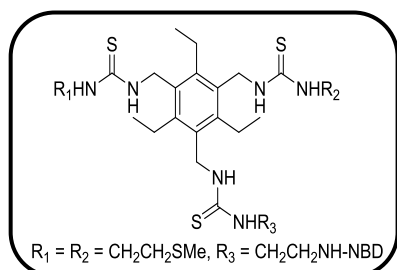

1,3,5-triethyl-2,4,6-tris(isothiocyanatomethyl)benzene (100 mg, 0.266 mmol), 2-(methylthio)ethan-1-amine (46 mg, 0.5059 mmol) and *N*'-(7-nitrobenzo[*c*][1,2,5]oxadiazol-4-yl)ethane-1,2-diamine (59 mg, 0.266 mmol) provided the brownish solid compound as 70% yield. The product was

characterized by the ES-MS, <sup>1</sup>H NMR and <sup>13</sup>C NMR analyses. **<sup>1</sup>H NMR (600 MHz, DMSO-*d*<sub>6</sub>)**: δ 8.44 (s, 1H), 8.36 (brs, 1H), 7.57-7.49 (m, 4H), 6.44 (brs, 2H), 6.35 (s, 1H), 4.57 (s, 6H), 3.05 (s, 4H), 2.79 (s, 2H), 2.60 (s, 6H), 2.06 (s, 6H), 1.88 (s, 6H), 1.29-1.07 (m, 9H). **<sup>13</sup>C NMR (151 MHz, DMSO-*d*<sub>6</sub>)** δ 173.0, 152.9, 147.6, 144.8, 143.9, 136.9, 100.7, 45.1, 32.9, 23.2, 22.6, 22.0, 16.8, 15.0. **ES-MS (ESI+) m/z:** (M+3H)<sup>+</sup>: 783.2679 (M+4H)<sup>+</sup> 784.2703, (M+5H)<sup>+</sup> 785.2652.

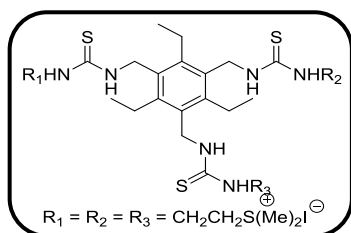

**3.7. Compound 5** — Following the general procedure as mentioned in section 2.6, using 1,1',1''-((2,4,6-triethylbenzene-1,3,5-triyl)tris(methylene))tris(3-(2-(methylthio)ethyl)thiourea (50mg, 0.077 mmol), and methyl iodide (16 μL, 0.2465 mmol)

provided the white solid compound as 70% yield. The product was confirmed by the ES-MS,

$^1\text{H}$  NMR and  $^{13}\text{C}$  NMR data.  $^1\text{H}$  NMR (600 MHz,  $\text{DMSO-}d_6$ ):  $\delta$  9.53-9.43 (m, 1H), 9.22-8.75 (m, 3H), 7.57-7.32 (m, 2H), 4.70-4.48 (m, 6H), 4.04-3.99 (m, 1H), 3.77 (s, 2H), 3.63-3.61 (m, 3H), 2.83-2.76 (m, 4H), 2.69-2.63 (m, 8H), 2.18 (s, 8H), 2.15 (s, 4H), 2.09-2.05 (m, 6H), 1.13-1.11 (m, 9H). The product was characterized by the ES-MS,  $^1\text{H}$  NMR and  $^{13}\text{C}$  NMR analyses.  $^{13}\text{C}$  NMR (151 MHz,  $\text{DMSO-}d_6$ )  $\delta$  168.9, 146.7, 129.5, 128.8, 62.8, 55.5, 49.1, 44.7, 42.6, 26.7, 25.5, 25.3, 24.0, 16.7, 15.5. **ES-MS (ESI+)**  $m/z$ :  $[\text{M} - 2\text{I} + \text{H}]^+$  821.2031.

**3.8. Compound 6** – Following the general procedure as mentioned in section 2.6, using 1,1',1''-((2,4,6-triethylbenzene-1,3,5-triyl)tris(methylene))tris(3-(2-(methylthio)ethyl)thiourea) (50mg, 0.077 mmol), methyl iodide (16  $\mu\text{L}$ , 0.2465 mmol) and

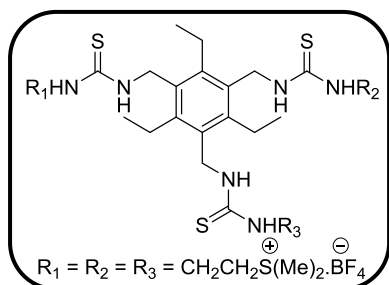

$\text{AgBF}_4$  (20 mol%) provided the brownish colour sticky compound as 65% yield. The product was characterized by the ES-MS,  $^1\text{H}$  NMR and  $^{13}\text{C}$  NMR analyses.  $^1\text{H}$  NMR (600 MHz,  $\text{DMSO-}d_6$ ):  $\delta$  9.52 -9.49 (m, 1H), 9.14-8.98 (m, 2H), 8.79-8.75 (m, 1H), 7.48-7.31 (brs, 2H), 4.64-4.51 (m, 6H), 4.04-3.98 (m, 1H), 3.77 (brs, 2H), 3.62-3.60 (m, 3H), 2.98-

2.96 (m, 1H), 2.82-2.81 (m, 3H), 2.68-2.62 (m, 8H), 2.18 (s, 8H), 2.15 (s, 4H), 2.08-2.04 (m, 6H), 1.12-1.10 (m, 9H).  $^{13}\text{C}$  NMR (151 MHz,  $\text{DMSO-}d_6$ )  $\delta$  168.9, 146.6, 129.4, 128.7, 62.7, 55.4, 49.0, 44.6, 42.5, 26.6, 25.2, 23.9, 16.6, 15.5. **ES-MS (ESI+)**  $m/z$ :  $[\text{M}/3 + \text{NH}_4^+]$  337.1539. **MALDI-TOF**  $m/z$ :  $[\text{M}/2 + 1\text{H}]^+$  478.5.

**3.9. Compound 7** – Following the general procedure as mentioned in section 2.6, using

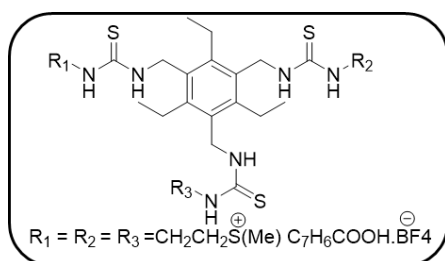

1,1',1''-((2,4,6-triethylbenzene-1,3,5-triyl)tris(methylene))tris(3-(2-

(methylthio)ethyl)thiourea) (50mg, 0.077 mmol), 4-(bromomethyl)benzoic acid (53mg, 0.2464 mmol) and  $\text{AgBF}_4$  (20 mol%) provided the brownish color sticky

compound as 65% yield. The product was characterized by the ES-MS,  $^1\text{H}$  NMR and  $^{13}\text{C}$  NMR analyses.  **$^1\text{H}$  NMR (600 MHz,  $\text{DMSO-}d_6$ )**  $\delta$  13.07 (brs, 3H), 9.81-9.21 (m, 4H), 7.99-7.97 (m, 1H), 7.93-7.90 (m, 4H), 7.63 (s, 1H), 7.61 (m, 2H), 7.58-7.42 (m, 4H), 4.76 (s, 1H), 4.61-4.45 (m, 11H), 3.76 (s, 3H), 3.63 (s, 3H), 2.72 (s, 4H), 2.62 (s, 8H), 2.08 (s, 9H), 1.12-1.06 (m, 9H).  **$^{13}\text{C}$  NMR (151 MHz,  $\text{DMSO-}d_6$ )**  $\delta$  183.1, 167.6, 165.3, 144.5, 144.3, 143.3, 140.7, 131.0, 130.3, 130.1, 129.9, 129.8, 129.7, 129.4, 44.9, 43.3, 42.6, 37.2, 33.8, 33.0, 23.5,

23.4, 23.2, 16.9, 16.8, 16.6, 15.3, 15.0, 14.8. **ES-MS (ESI+)** **m/z**:  $[M - 2BF_4^- + NH_4^+]$  1159.7907,  $[M - 2BF_4^- - 2Me + H]^+$  1111.7909. **MALDI-TOF m/z**:  $[(M - BF_4)/3 + 1H]^+$  410.1.

**3.10. Compound 8** – Following the general procedure as mentioned in section 2.7, using

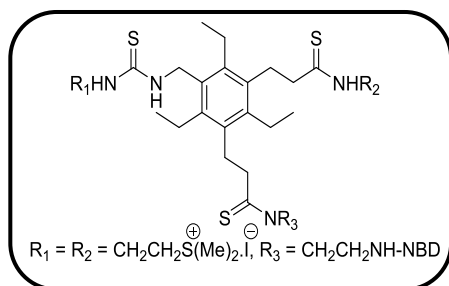

compound **4** (100 mg, 0.128 mmol) and methyl iodide (17  $\mu$ L, 0.2691 mmol) provided the solid compound as 70% yield. The product was characterized by the ES-MS,  $^1H$  NMR and  $^{13}C$  NMR analyses.  $^1H$  NMR (600 MHz, DMSO- $d_6$ )  $\delta$  8.44 (s, 1H), 8.35-8.34 (m, 1H), 7.61-7.49 (m, 4H), 6.50 (s, 2H), 6.45-6.34 (m, 1H), 4.57

(s, 6H), 3.84 (s, 2H), 3.05 (s, 2H), 2.79 (s, 4H), 2.59 (s, 4H), 2.06 (s, 6H), 1.88 (s, 12H), 1.22 (s, 3H), 1.08-1.07 (m, 6H).  $^{13}C$  NMR (151 MHz, DMSO- $d_6$ )  $\delta$  173.0, 145.5, 144.8, 143.9, 137.0, 100.7, 100.4, 63.5, 44.8, 43.2, 32.9, 31.7, 30.3, 29.5, 23.2, 22.6, 21.9, 16.8, 15.0, 14.4. **ES-MS (ESI+)** **m/z**:  $[M + Br^- + H]^+$  1145.5355,  $[M + Br^- + 2H]^+$  1146.5326,  $[M + Br^- + 2H]^+$  1147.5347. **MALDI-TOF m/z**:  $[M/2 + 2H]^+$  534.6,  $[M/2 + 3H]^+$  535.3,  $[M/2 + 4H]^+$  536.6.

**3.11. Compound 9** – Following the general procedure as mentioned in section 2.7, using

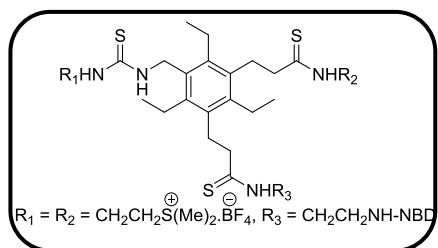

compound **4** (100 mg, 0.128 mmol) and methyl iodide (17  $\mu$ L, 0.2691 mmol) and AgBF<sub>4</sub> (20 mol%) provided the sticky compound as 70% yield. The product was characterized by the ES-MS,  $^1H$  NMR and  $^{13}C$  NMR analyses.  $^1H$  NMR (600 MHz, DMSO- $d_6$ )  $\delta_{ppm}$  8.45-

8.42 (m, 1H), 8.34-8.33 (m, 1H), 7.75-7.49 (m, 4H), 6.50-6.43 (m, 2H), 6.35-6.33 (m, 1H), 4.57 (s, 6H), 3.83 (s, 2H), 3.04 (s, 2H), 2.78 (m, 4H), 2.59 (s, 4H), 2.06 (s, 6H), 1.87 (s, 12H), 1.22 (s, 3H), 1.09-1.06 (m, 6H).  $^{13}C$  NMR (151 MHz, DMSO- $d_6$ )  $\delta$  173.2, 145.6, 144.9, 144.1, 137.1, 100.8, 100.5, 63.6, 44.9, 43.3, 33.1, 31.9, 30.4, 29.6, 23.3, 22.7, 22.1, 16.9, 15.1, 14.5. **ES-MS (ESI+)** **m/z**:  $[M + Br^-]$  1063.5571. **MALDI-TOF m/z**:  $[M - 2BF_4]$  810.5,  $[M - 2BF_4 + 2H]^+$  812.5,  $[M - 2BF_4 + 4H]^+$  814.5.

**Table S1.** Chemical properties of the compounds.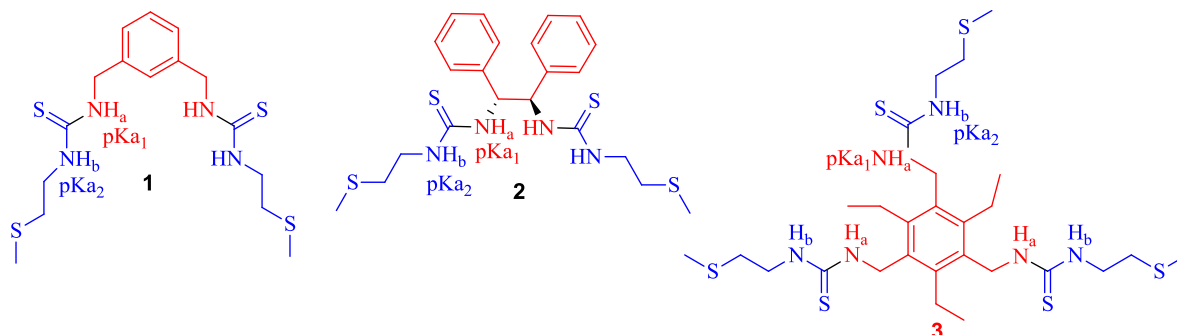

| Compound | LogP <sup>a</sup> | pK <sub>a1</sub><br>(N-H) <sup>b</sup> | pK <sub>a2</sub><br>(N-H) <sup>b</sup> | K <sub>d</sub> (mM) <sup>c</sup>                       |
|----------|-------------------|----------------------------------------|----------------------------------------|--------------------------------------------------------|
| <b>1</b> | 3.01              | 13.93                                  | 14.53                                  | 68.84                                                  |
| <b>2</b> | 4.83              | 14.37                                  | 13.73                                  | -                                                      |
| <b>3</b> | 6.40              | 13.74                                  | 14.22                                  | 81.84 (N-H <sub>a</sub> )<br>47.65 (N-H <sub>b</sub> ) |

LogP<sup>a</sup>, <sup>b</sup>pK<sub>a1</sub> and pK<sub>a2</sub> were calculated using the MarvinSketch 17.27 program.

<sup>c</sup>K<sub>d</sub> values of the compounds were calculated using <sup>1</sup>H NMR titration.

#### 4. <sup>1</sup>H-NMR Titrations:

**4.1. Anion binding analysis by <sup>1</sup>H-NMR titrations<sup>7, 8</sup>** – The <sup>1</sup>H NMR titration was performed for compound **1** and **3** in DMSO-d<sub>6</sub>. The stock solutions of the compound (8.4 mM) and tetrabutyl ammonium chloride (TBACl; 6 M) were prepared in DMSO-d<sub>6</sub>. The TBACl was used as the source of Cl<sup>-</sup> ion. <sup>1</sup>H-NMR titrations of the compounds in DMSO-d<sub>6</sub> were performed by the subsequent addition of TBACl (0-35 equiv.). The changes in chemical shift (Δδ) values of the N-H protons of the compounds were analysed. MestReNova software was used for the stacking of all the titration spectra. The changes in chemical shift against the concentration of chloride ion were fitted by the WinEQNMR2 program using 1:1 binding model.<sup>8</sup> The dissociation constant (K<sub>d</sub>) values were determined by taking the reciprocal of binding constant (K<sub>a</sub>; as mentioned in WinEQNMR2 program). The following equation (Eq.-S1) was used to calculate the binding constant-

$$\delta_{cal} = \sum_{m=1}^{m=i} \sum_{n=0}^{n=j} \frac{\delta_{mn} \beta_{mn} m [M]^m [L]^n}{[M]_{total}} \dots \text{Eq.-S1}$$

Where,  $M$  represents the free, uncomplexed receptor and  $L$  is the ligand;  $\delta_{calc}$ , is the weighted average of the chemical shifts of the various  $M$ -containing species present,  $M_m L_n$ , and  $i$  and  $j$  represent the maximum values of  $m$  and  $n$  respectively.<sup>8</sup>

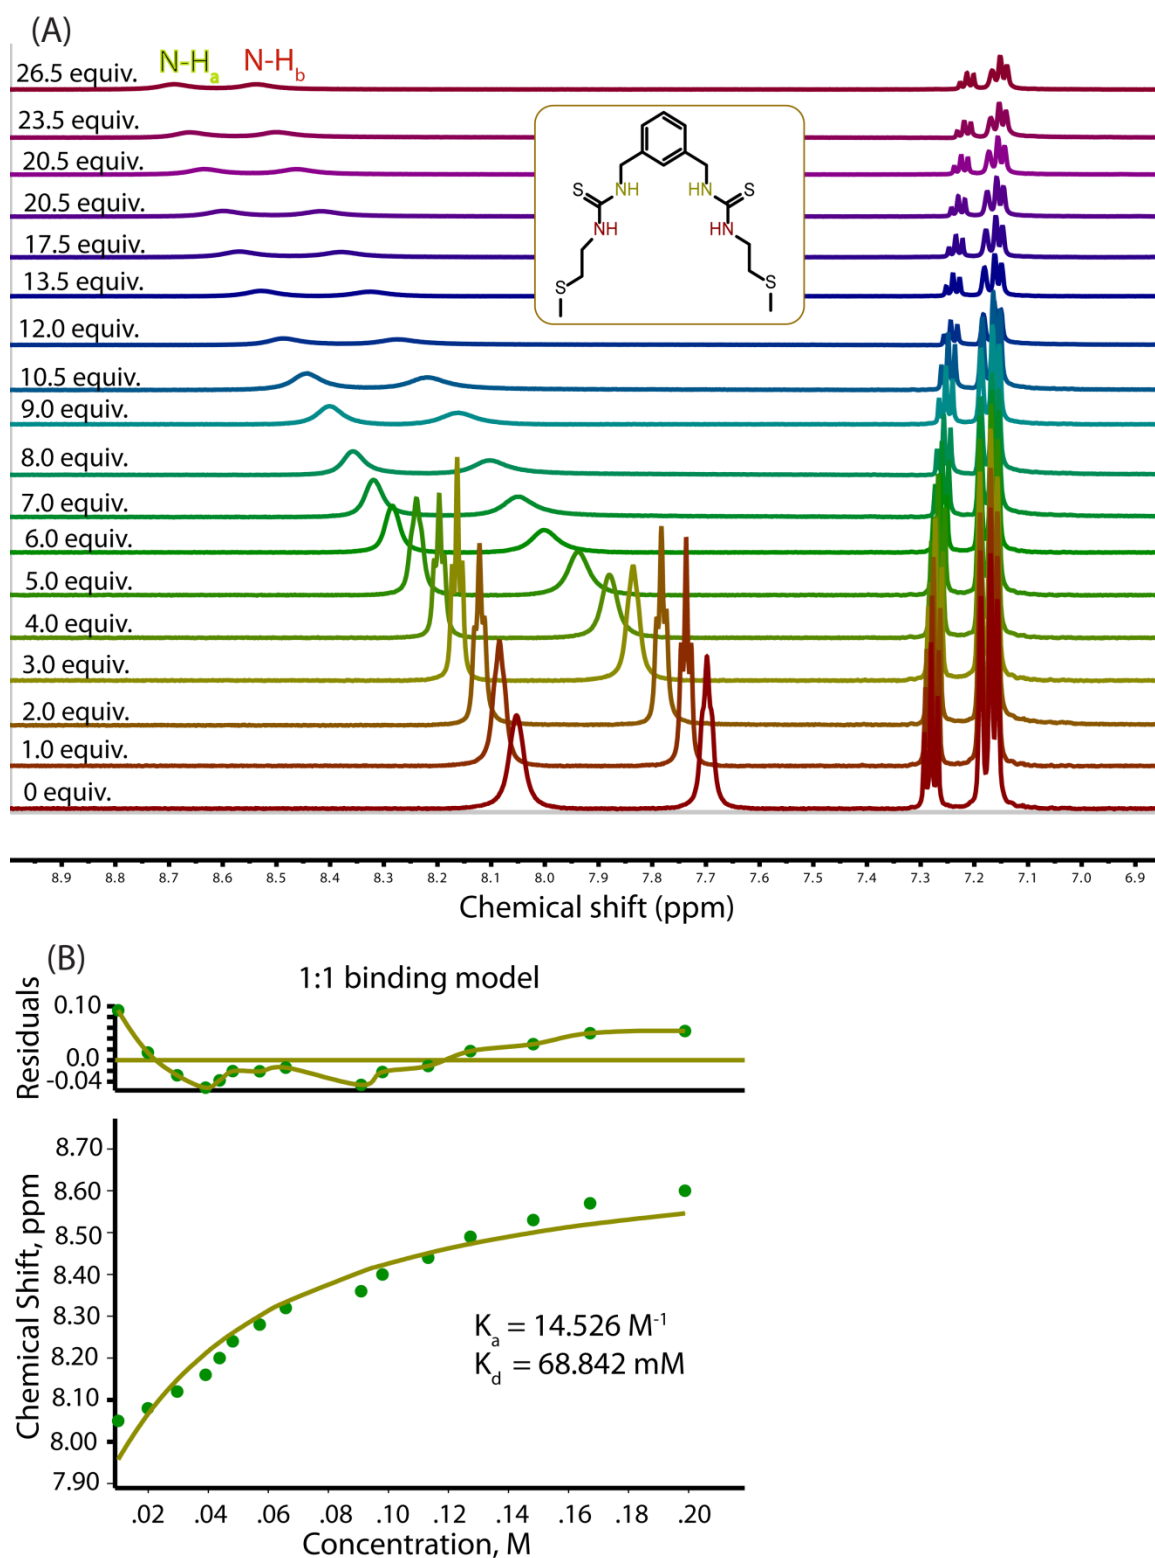

**Figure S1:**  $^1\text{H}$ -NMR (600MHz) titration spectra for compound **1** with sequential addition of TBACl in DMSO- $d_6$  solvent. The amounts of added TBACl are shown on the spectra (A). Plot of concentration of TBACl versus chemical shift of  $^1\text{H}$  signal, fitted to 1:1 binding model of WinEQNMR2 program (B).

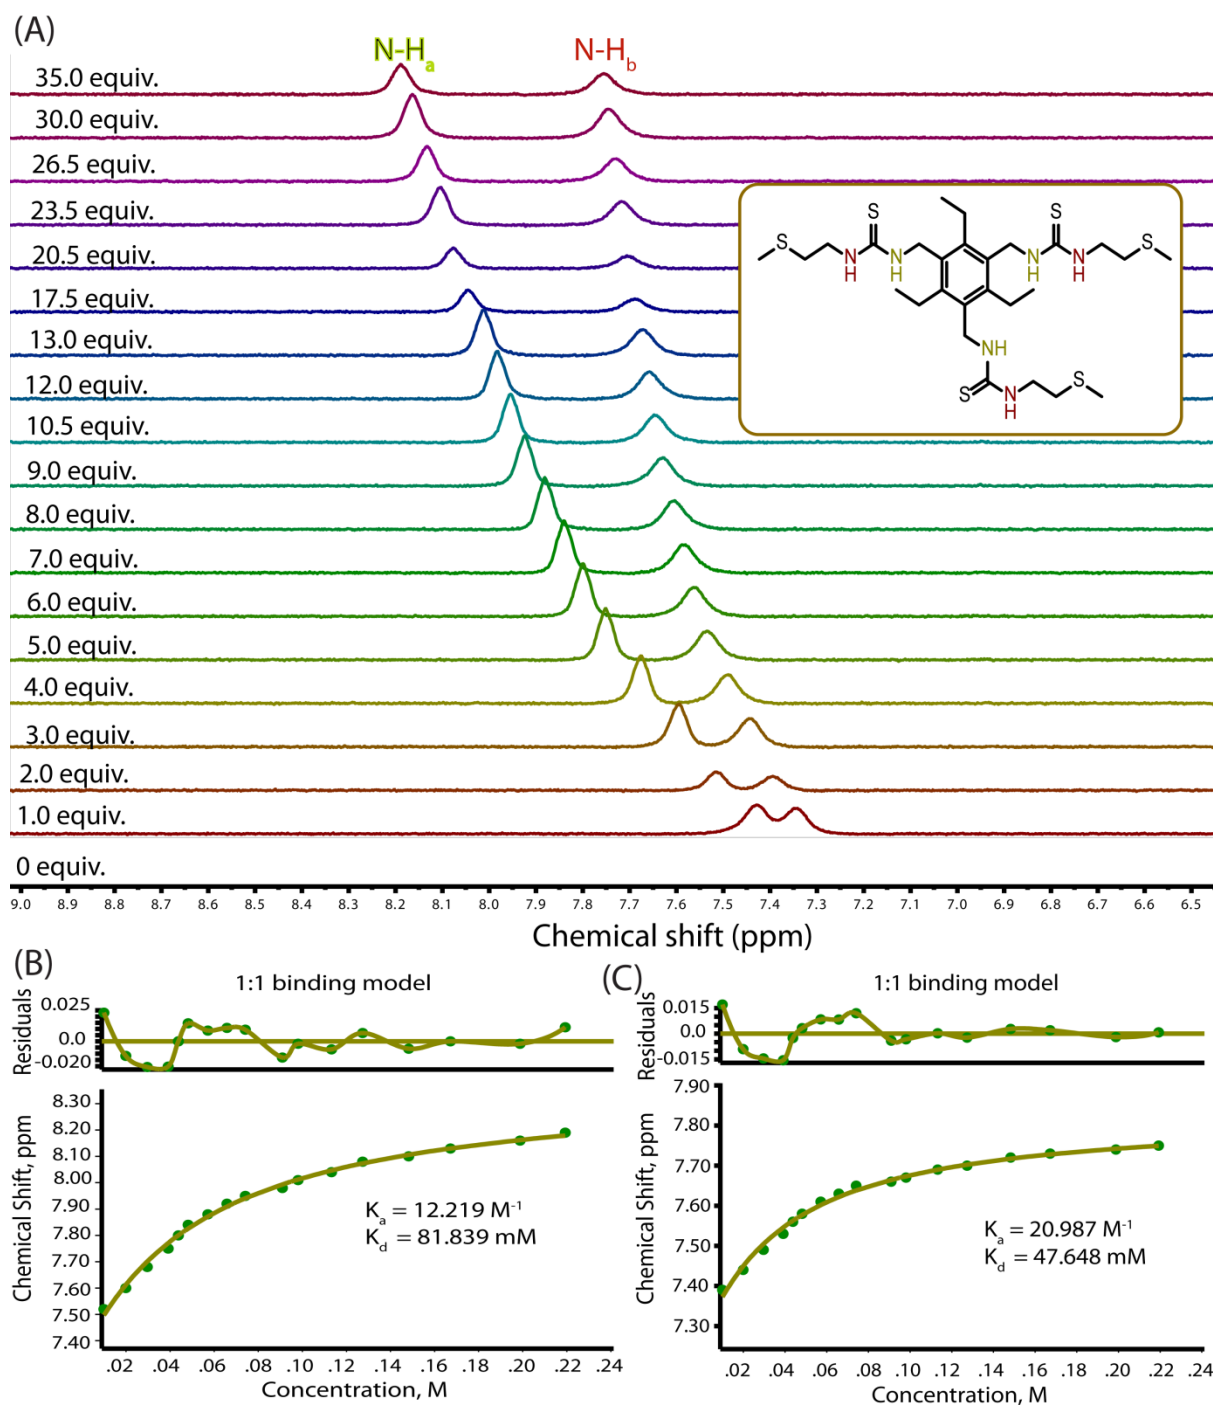

**Figure S2:**  $^1\text{H}$ -NMR (600MHz) titration spectra for compound **3** with sequential addition of TBACl in DMSO- $d_6$  solvent. The amounts of added TBACl are shown on the spectra (A). Plot of concentration of TBACl versus chemical shift of  $^1\text{H}$  signal (for N- $\text{H}_a$ ), fitted to 1:1 binding model of WinEQNMR2 program (B). Plot of concentration of TBACl versus chemical shift of  $^1\text{H}$  signal (for N- $\text{H}_b$ ), fitted to 1:1 binding model of WinEQNMR2 program (C).



**4.2. Determination of anion binding stoichiometry by Job's plot<sup>3, 7, 9</sup>** – A continuous variation method of Job's plot was used to determine the binding stoichiometry of the complex which was formed during the titration of compound **3** in the presence of Cl<sup>-</sup> ion (TBACl). The DMSO-d<sub>6</sub> solvent was used to prepare the stock solutions of host (compound) and the guest (TBACl). During the titration experiments total 10 separate NMR tubes containing the required amount of host and guest concentrations were taken to keep the final concentration fixed to be at 10 mM. The chemical shift values were recorded and the changes of chemical shift of N-H proton at different mole fraction of the Cl<sup>-</sup> ion were tabulated (Table S2). The Job's plot of compound **3** specifies a 1:1 binding stoichiometry of the complex.<sup>7</sup>

**Table S2:** Calculation and result table for the Job's plot analysis.

| Sample No. | Host conc. ([H], mM) | Guest conc. ([G], mM) | [H] + [G] (mM) | [H]/([H]+[G]) | $\delta$ of proton | $\Delta\delta$ | {[H] / ([H] + [G])} * $\Delta\delta$ |
|------------|----------------------|-----------------------|----------------|---------------|--------------------|----------------|--------------------------------------|
| JB-1-1d    | 1.0                  | 9.0                   | 10             | 0.1           | 7.66               | 0.25           | 0.025                                |
| JB-2-1d    | 2.0                  | 8.0                   | 10             | 0.2           | 7.65               | 0.24           | 0.048                                |
| JB-3-1d    | 3.0                  | 7.0                   | 10             | 0.3           | 7.62               | 0.21           | 0.063                                |
| JB-4-1d    | 4.0                  | 6.0                   | 10             | 0.4           | 7.6                | 0.19           | 0.076                                |
| JB-5-1d    | 5.0                  | 5.0                   | 10             | 0.5           | 7.57               | 0.16           | 0.08                                 |
| JB-6-1d    | 6.0                  | 4.0                   | 10             | 0.6           | 7.54               | 0.13           | 0.078                                |
| JB-7-1d    | 7.0                  | 3.0                   | 10             | 0.7           | 7.51               | 0.1            | 0.07                                 |
| JB-8-1d    | 8.0                  | 2.0                   | 10             | 0.8           | 7.48               | 0.07           | 0.056                                |
| JB-9-1d    | 9.0                  | 1.0                   | 10             | 0.9           | 7.44               | 0.03           | 0.027                                |
| JB-10-1d   | 10                   | 0.0                   | 10             | 1             | 7.41               | 0              | 0                                    |

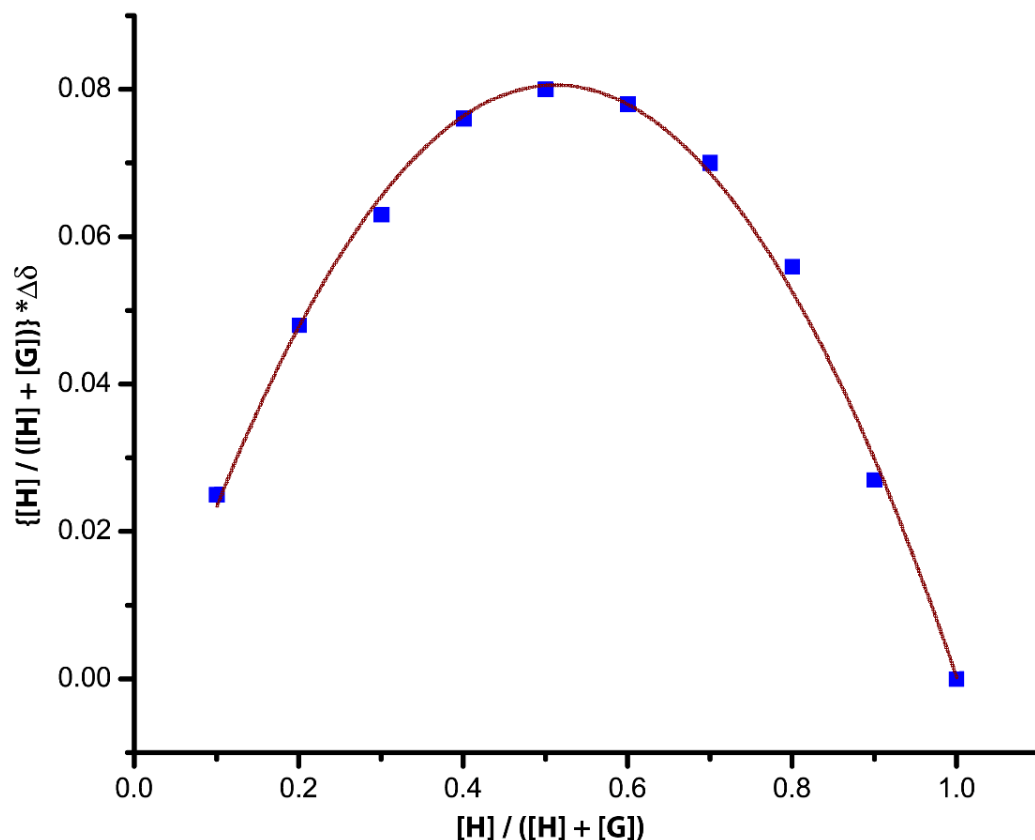

**Figure S3:** Job's plot for the compound **3** (according to Table S2).

### 5. Crystallographic Study:

The crystal was obtained by crystallisation of compound **3** in the presence of  $\text{Me}_4\text{N}^+\text{Cl}^-$  in DMSO solvent at room temperature.<sup>3</sup> The crystallographic data were recorded by the Bruker Nonius SMART APEX CCD diffractometer equipped with a graphite monochromator and Apex CCD camera using SMART software. All crystallographic data were refined using the software SHELXL-2014/7 and or Olex2 1.2-alpha. The ORTEP diagram was obtained with the help of ORTEP software with 50% thermal ellipsoid. The tetrabutylammonium chloride salt was used as a chloride ion source for co-crystallization with the compound **3** in presence of DMSO solvent. The crystallographic parameters and refinement data were listed in Table S3. All H-atoms are omitted from the ORTEP diagram for clarity.

**Table S3:** Crystal parameters and refinement data of the anion complex.

| Parameters                           | Compound 3                      |
|--------------------------------------|---------------------------------|
| Formula                              | C27 H48 N6 S6, C16 H36 N, Cl, O |
| Fw                                   | 942.98                          |
| Crystal system                       | triclinic                       |
| Space group                          | 'P -1'                          |
| a/Å                                  | 12.8015(8)                      |
| b/Å                                  | 13.8204(8)                      |
| c/Å                                  | 16.5396(7)                      |
| $\alpha$ /°                          | 67.517(5)                       |
| $\beta$ /°                           | 87.324(4)                       |
| $\gamma$ /°                          | 85.158(5)                       |
| V/Å <sup>3</sup>                     | 2693.8(3)                       |
| Z                                    | 2                               |
| Dc/g cm <sup>-3</sup>                | 1.163                           |
| $\mu$ Mo K $\alpha$ mm <sup>-1</sup> | 0.341                           |
| F000                                 | 1024.0                          |
| T/K                                  | 293(2)                          |
| $\theta$ max.                        | 25.00                           |
| Total no. of reflections             | 18456                           |
| Independent reflections              | 9485                            |
| Parameters refined                   | 557                             |
| R1, I > 2 $\sigma$ (I)               | 0.0739                          |
| wR2, I > 2 $\sigma$ (I)              | 0.1708                          |
| GOF (F2 )                            | 1.020                           |
| CCDC                                 | 1900065                         |

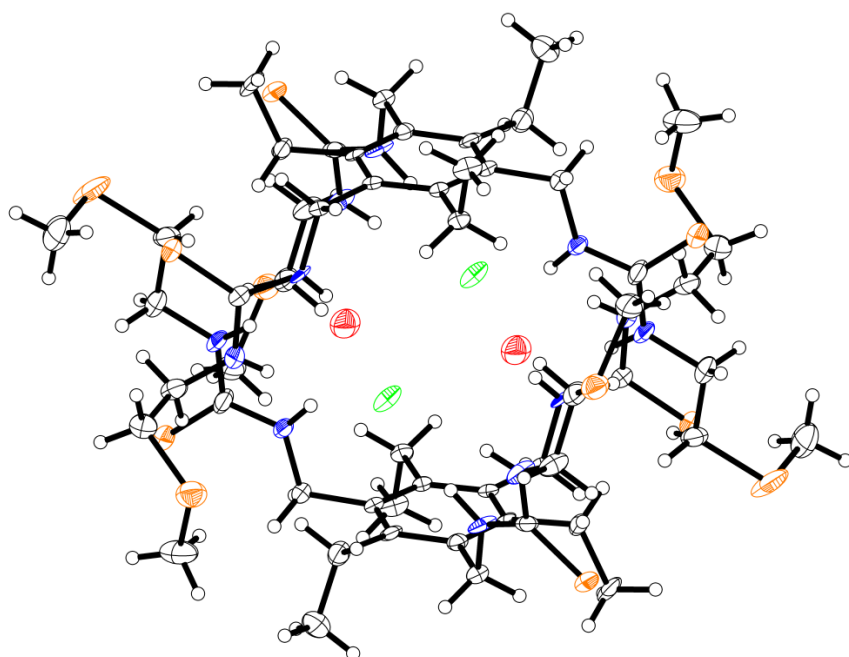

**Figure S4:** ORTEP diagram of complex **3** (50% thermal ellipsoid plot, H-atoms are omitted for clarity). The TBA<sup>+</sup> cations outside the cavity were omitted for clarity.

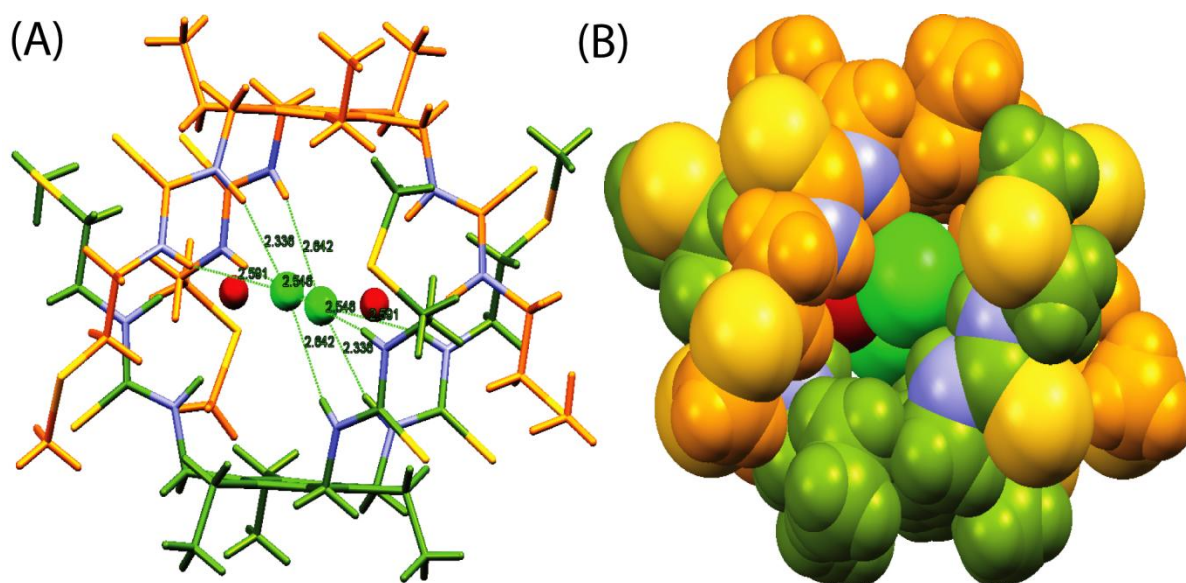

**Figure S5:** X-ray crystal structure depicting the non-covalent interactions involved in 2 : 2 Cl<sup>-</sup> ion encapsulation (capped sticks and spacefill model) by compound **3** ((**3**·Cl<sup>-</sup>·H<sub>2</sub>O)<sub>2</sub>), where the green ball represents the chloride ion, red ball represents the water molecules, the purple colour represents the nitrogen atom and yellow colour represents sulphur atom. One molecule of compound **3** is coloured orange and the other is coloured the grey. The TBA<sup>+</sup> cations outside the cavity were omitted for clarity.

## 6. Ion Transport Activity Studies:

### 6.1. Ion transport activity studies using fluorescence based assay<sup>7,9,10</sup>

**6.1.1. Preparation of EYPC/CHOL-LUV $\Delta$ HPTS** – An appropriate amount of EYPC (stock solution, 50 mg/mL in deacidified CHCl<sub>3</sub>) and cholesterol (stock solution, 25 mg/mL in deacidified CHCl<sub>3</sub>) were taken in a clean and dry glass vial so that the molar ratio of EYPC and cholesterol would be 6:4. The solution was then dried under vacuum for minimum 6 hours to remove any remnants of CHCl<sub>3</sub> to form a transparent thin film. The dry film was then hydrated with 500  $\mu$ L of 20 mM HEPES buffer, pH 7.2 containing 100 mM NaCl and 1 mM HPTS. The solution was then kept at room temperature for 1 hour with occasional vortexing (6-7 times). The suspension was further passed through 12-13 cycles of freeze-thaw (freezing with liquid N<sub>2</sub> and melting with lukewarm water respectively) to break up the multilamellar vesicles. After this the suspension was vortexed for the next 15 minutes. The vesicle solution was extruded through a polycarbonate membrane (using a mini-extruder from Avanti Polar Lipids) having pore size of 200 nm (size of LUVs are > 200 nm) for 19/21-times (as it must be an odd number), to give LUVs with a mean diameter of ~200 nm. All the unencapsulated dye from the extraventricular solution was removed using gel filtration technique (Sephadex G-50) and 20 mM HEPES buffer, pH 7.2 containing 100 mM NaCl as the eluting solvent. The final lipid concentration was 25 mM (assuming 100 % lipid regeneration).

**6.1.2. Ion transport activity across EYPC/CHOL-LUV $\Delta$ HPTS<sup>7, 9, 10</sup>** –The HPTS fluorescence assay was performed according to the reported procedure. Briefly, in a clean and dry 3 mL fluorescence cuvette, 2890  $\mu$ L of buffer solution (20 mM HEPES buffer, pH 7.2 containing 100 mM NaCl), 50  $\mu$ L of 25 mM EYPC/CHOL-LUV $\Delta$ HPTS and 50  $\mu$ L of 0.75 M NaOH were taken and the cuvette was placed in the fluorescence spectrophotometer (Fluoromax-4 spectrofluorometer) under slow stirring condition for approximately 3 minutes. During this time a pH gradient of ~ 0.6 gets generated between the extra and intra-vesicular system. The HPTS fluorescence intensity was monitored (at t = 0 s) at  $\lambda_{em} = 510$  nm ( $\lambda_{ex} = 450$  nm). After addition of 10  $\mu$ L of the compound at t = 50 s, the Cl<sup>-</sup> ion transport kinetics was recorded and finally at t = 450 s, the vesicles were lysed by adding 20  $\mu$ L of 20% Triton X-100 solution. The fluorescence intensity measurement was continued for further 50 s (i.e. up to t = 500 sec).

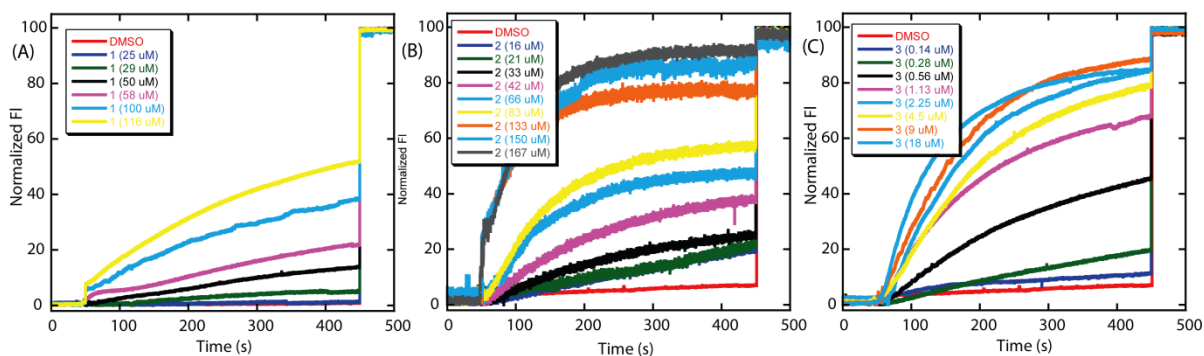

**Figure S6.** Concentration dependent curves for the compounds **1** (A), **2** (B) and **3**(C). The Cl<sup>-</sup> ion transport activity of the compounds were measured across the EYPC/CHOL-LUV $\rightarrow$ HPTS.

**6.1.3. Quantitative measurement of transport activity from HPTS assay<sup>7, 9, 10</sup>** –The fluorescence emission intensities of the HPTS dye were normalized and the intensities appearing at t = 0 and t = 500 s were taken as 0 and 100 units, respectively. The normalized fluorescent intensities (FI) at t = 450 s (prior to the addition of Triton X-100 solution) were considered to measure the transport activity of the compounds.

$$i.e. \text{ Transport activity, } T_{HPTS} = \frac{F_t - F_0}{(F_\infty - F_0)} \times 100 \% \quad \dots\dots\dots \text{Eq.-S2}$$

Where,  $F_t$  = fluorescence intensity at time t = 450 s,  $F_0$  = fluorescence intensity immediately before the addition of the compound (t = 0 s) and  $F_\infty$  = fluorescence intensity after addition of Triton X-100 solution (i.e. at saturation after complete saturation at t = 500 s).

**6.1.4. Measurement of half maximal effective concentrations ( $EC_{50}$ ) of compound from HPTS assay<sup>7, 9, 10</sup>** – The fluorescence signals from the HPTS dye were normalized between 0 to 100 units (t = 0 to t = 400 s). The normalized fluorescent intensity (FI) values at t = 450 s (prior to the addition of Triton X-100 solution) were considered as the transport activity of the compound. The transport activity (T) of a compound at a particular concentration was determined by using previous Eq.-S2. To get the effective concentration ( $EC_{50}$ ) of the compound, the transport activity values were plotted against concentration and fitted using the Hill equation (Eq.-S3).

$$T = T_{\infty} + \frac{T_0 - T_{\infty}}{\left[1 + \left(\frac{c}{EC_{50}}\right)^n\right]} \quad \dots\dots \text{Eq. -S3}$$

Here,  $T_0$  and  $T_{\infty}$  correspond to the transport activity obtained in the absence and at excess concentration of the compound, respectively.  $c$  = Concentration of the compound.  $EC_{50}$  value corresponds to the concentration of compound required to obtain half of the maximum transport activity. The number of molecules required for the transportation of a single ion is given by 'n' and it is the Hill coefficient for the compound.

## **6.2. Ion transport activity studies using ion selective electrode based assay**

### **6.2.1. Chloride ion efflux studies using chloride ion selective electrode (chloride-ISE) –**

The extent of chloride ion efflux by the compounds from the LUVs was measured using a chloride ion selective electrode (chloride ISE from Thermo Scientific™ Orion™). The chloride-ISE was calibrated prior to each experiment with standard 1 ppm, 10 ppm and 100 ppm of aqueous NaCl solution. The  $Cl^-$  ion concentration (ppm) appearing in the display of the ion meter was set in the continuous mode for the time-dependent measurements.

**6.2.2. Preparation of EYPC/CHOL-LUV –** The large unilamellar vesicles (LUVs) were prepared by mixing appropriate amount of EYPC (stock solution, 50 mg/mL in deacidified  $CHCl_3$ ) and cholesterol (stock solution, 25 mg/mL in deacidified  $CHCl_3$ ) in a clean and dry glass vial in the molar ratio of 6:4. The solution was dried under vacuum for minimum 6 hours to remove any remnants of  $CHCl_3$  and to form a transparent thin film. The dry film was then hydrated with 500  $\mu$ L buffer (5 mM phosphate and 100 mM NaCl, pH 7.2). It was then kept at room temperature for 1 hour with occasional vortexing (6-7 times). The suspension was further passed through 12-13 cycles of freeze-thaw (freezing with liquid  $N_2$  and melting with lukewarm water respectively) to break up the multilamellar vesicles. After this the suspension was vortexed for the next 15 minutes. The vesicle solution was extruded through a polycarbonate membrane (using a mini-extruder from Avanti Polar Lipids) having pore size of 200 nm (size of LUVs are  $> 200$  nm) for 19/21-times (as it must be an odd number), to give LUVs with a mean diameter of  $\sim 200$  nm. The unilamellar vesicles were dialyzed with 5 mM phosphate buffer at pH 7.2 containing 100 mM  $NaNO_3$  (iso-osmolar with 100 mM NaCl buffer) to remove the extravesicular NaCl solution. The LUVs were then collected and the

final volume adjusted to 500  $\mu\text{L}$  with 5 mM phosphate buffer at pH 7.2 containing 100 mM  $\text{NaNO}_3$ . The final lipid concentration was 25 mM (assuming 100 % lipid regeneration).

**6.2.3. Chloride efflux study across EYPC/CHOL-LUVs** – To measure the extent of chloride efflux using ISE, the EYPC/CHOL-LUVs (50  $\mu\text{L}$ ) and 5 mM phosphate buffer at pH 7.2, containing 100 mM  $\text{NaNO}_3$  (3940  $\mu\text{L}$ ) were taken in a clean and dry glass vial and kept under mild stirring condition while the glass electrode was immersed into the solution. To initiate the  $\text{Cl}^-$  ion transport kinetics at  $t = 50$  s, 10  $\mu\text{L}$  of the synthetic compound was added into the stirring solution and the readings were noted from the ion meter. After 5 minutes, the vesicles were lysed using 50  $\mu\text{L}$  of 20% Triton X-100 solution. The total  $\text{Cl}^-$  ion efflux reading was taken at 7 minutes (allowing complete disruption of the LUVs). The initial reading was considered as 0%  $\text{Cl}^-$  ion efflux and the final reading at 7 min was considered as 100%  $\text{Cl}^-$  ion efflux.

**6.2.4. Quantitative measurement of transport activity from chloride-ISE assay** – The  $\text{Cl}^-$  ion efflux efficiency of the compounds were normalized and the  $\text{Cl}^-$  ion efflux appearing at  $t = 0$  and  $t = 700$  s were taken as 0 and 100 units, respectively. The normalized chloride efflux efficiencies (EE) at  $t = 500$  s (prior to the addition of Triton X-100 solution) were considered for the measurement of chloride transport efficiency of the compounds-

*i. e. Chloride efflux efficiency,  $EE_{\text{Chloride}} = \frac{EE_t - EE_0}{(EE_\infty - EE_0)} \times 100\%$  ..... Eq.-S1*

Where,  $EE_t$  =  $\text{Cl}^-$  ion efflux efficiency at  $t = 500$  s (prior to the addition of Triton X-100 solution),  $EE_0$  =  $\text{Cl}^-$  ion efflux efficiency immediately before the addition of the compounds ( $t = 0$  s) and  $EE_\infty$  =  $\text{Cl}^-$  ion efflux efficiency after addition of Triton X-100 solution (i.e. at saturation after complete leakage at  $t = 700$  s).

The differences in the  $\text{Cl}^-$  ion transport activities of the compounds between the HPTS and ISE based assays could be due to the concentration differences of the compounds used for both the assay.



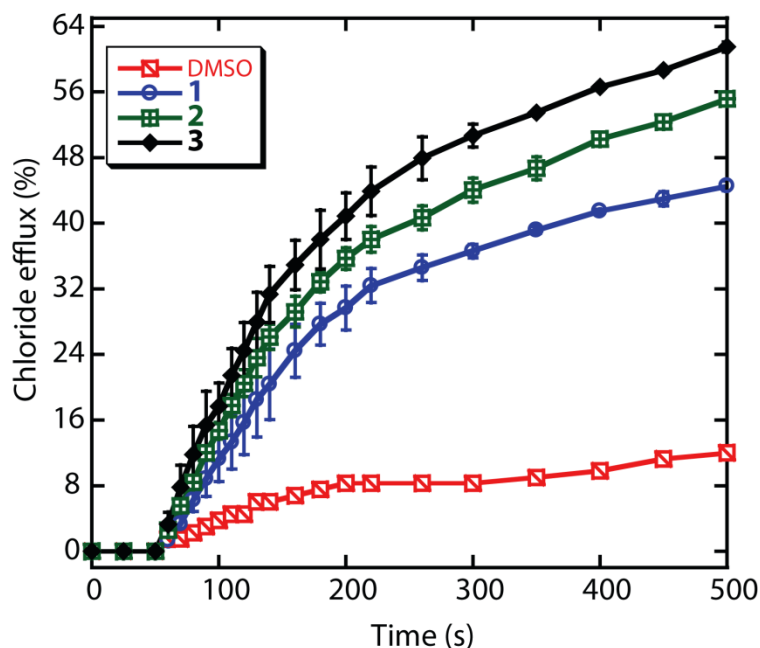

**Figure S7.** Transmembrane  $\text{Cl}^-$  ion transport activity of the compounds (**1-3**, Compound concentration = 18  $\mu\text{M}$ ) across the EYPC/CHOL-LUVs as measured by chloride-ion selective electrode at pH 7.2.

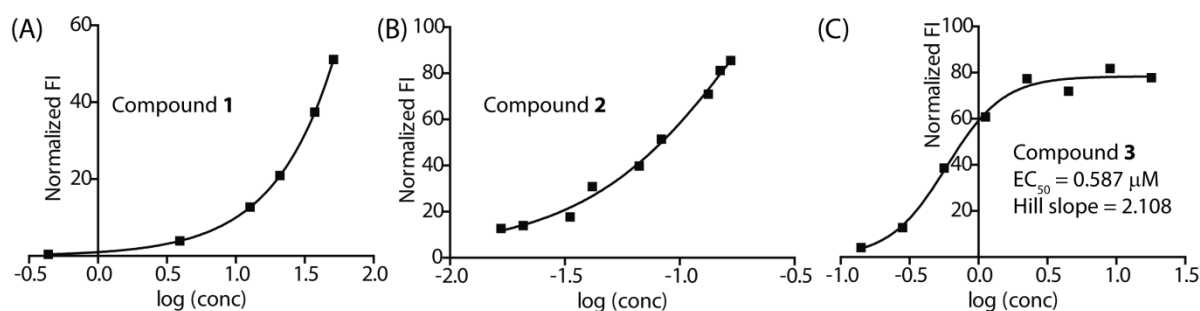

**Figure S8.** Concentration dependent  $\text{Cl}^-$  ion transport activity of the compounds across the EYPC/CHOL-LUV $\rightarrow$ HPTS. Dose-response plot of  $\text{Cl}^-$  ion transport activity of the compounds at 450 sec (after the addition of the compounds). The effect solvent on the transport activities was corrected. The  $\text{EC}_{50}$  values of compounds **1** and **2** cannot be measured because of the aggregation formation at higher concentrations.

## 7. Ion Selectivity Studies using HPTS Assay with Applied pH Gradient:

**7.1. Buffer and stock solution preparation** — Required amount of HEPES buffer and MCl or  $\text{Na}_x\text{A}$  salt (LiCl, NaCl, KCl,  $\text{CaCl}_2$ ,  $\text{MgCl}_2$ , NaBr, NaI,  $\text{NaNO}_3$ , and  $\text{NaClO}_4$ ) were added and dissolved in Milli-Q water to attain a buffer composition of 20 mM HEPES buffer pH 7.2, containing 100 mM of the respective salt (MCl or  $\text{Na}_x\text{A}$ ).

**7.2. EYPC/CHOL-LUV $\supset$ HPTS preparation** — The EYPC/CHOL-LUV $\supset$ HPTS were prepared following a similar procedure as in section 6.1.1.

**7.3. Anion selectivity studies<sup>7, 9, 10</sup>** — For the HPTS fluorescence assay, in a clean and dry 3 mL fluorescence cuvette buffer solution (2890  $\mu$ L of 20 mM HEPES buffer pH 7.2, containing 100 mM Na<sub>x</sub>A, pH = 7.2, where A = Cl<sup>-</sup>, Br<sup>-</sup>, I<sup>-</sup>, NO<sub>3</sub><sup>-</sup>, and ClO<sub>4</sub><sup>-</sup>), 50  $\mu$ L of 25 mM EYPC/CHOL-LUV $\supset$ HPTS and 50  $\mu$ L of 0.75 M NaOH were taken and the cuvette was placed in the fluorescence spectrophotometer under slow stirring condition for approximately 3 minutes. During this time period a pH gradient of  $\sim$  0.6 gets generated between the extra and intra-vesicular system. The HPTS fluorescence intensity was monitored (at t = 0 s) at  $\lambda_{em}$  = 510 nm ( $\lambda_{ex}$  = 450 nm). After addition of 10  $\mu$ L of the respective compound at t = 50 s, the Cl<sup>-</sup> ion transport kinetics was recorded and finally at t = 450 s, the vesicles were lysed by adding 20  $\mu$ L of 20% Triton X-100 solution. The fluorescence intensity measurement was continued for further 50 s.

**7.4. Cation selectivity studies<sup>7, 9, 10</sup>** — For cation selectivity assay a similar procedure was followed as reported in section 7.3. Here, 20 mM HEPES buffer pH 7.2, containing 100 mM MCl (where M = Li<sup>+</sup>, Na<sup>+</sup>, K<sup>+</sup>, Ca<sup>2+</sup>, and Mg<sup>2+</sup>) was used. In this experimental condition no difference in Cl<sup>-</sup> ion transport activity was observed for the cations.

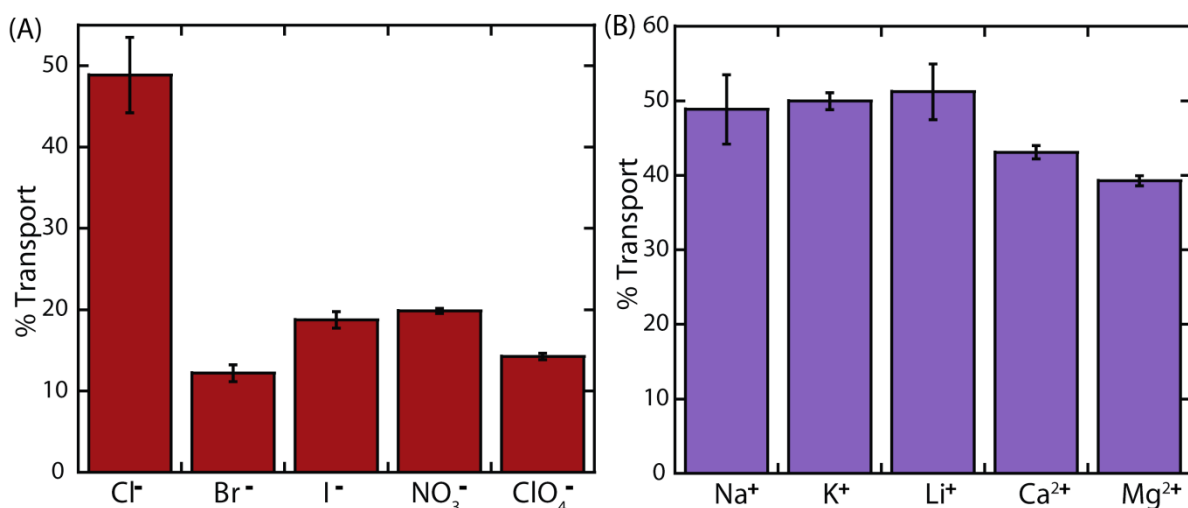

**Figure S9.** Anion (A) and cation (B) selectivity of compound **3** as measured by HPTS-based fluorescence assay in the presence of a pH gradient of  $\sim$ 0.6.

## 8. Evidence for the Mechanistic Pathway for Chloride Ion Transport<sup>7, 9, 10</sup>

**8.1. Preferential ion selectivity assay using FCCP** — The LUVs were prepared by following a similar procedure as discussed in the section 6.1.1. For this assay, 2890  $\mu\text{L}$  of buffer solution (20 mM HEPES buffer, pH 7.2 containing 100 mM NaCl), 50  $\mu\text{L}$  of 25 mM EYPC/CHOL-LUV $\Rightarrow$ HPTS and 50  $\mu\text{L}$  of 0.75 M NaOH were taken in a clean and dry fluorescence cuvette and the cuvette was placed in the fluorescence spectrophotometer under slow stirring condition for approximately 3 minutes. During this time a pH gradient of  $\sim 0.6$  gets generated between the extra and intra-vesicular system. The HPTS fluorescence intensity was monitored (at  $t = 0$  s) at  $\lambda_{\text{em}} = 510$  nm ( $\lambda_{\text{ex}} = 450$  nm). The time-dependent  $\text{Cl}^-$  ion transport activities were measured in the presence of compound (8  $\mu\text{L}$ ), and/or FCCP (2  $\mu\text{L}$  from 1.5  $\mu\text{M}$  stock solution). The kinetics measurements were initiated at  $t = 50$  s and finally at  $t = 450$  s, the vesicles were lysed by adding 20  $\mu\text{L}$  of 20% Triton X-100 solution. The fluorescence intensity measurement was continued for further 50 s. To investigate whether the anionophore is transporting  $\text{H}^+$  the assay was done both in presence and in absence of FCCP (2  $\mu\text{L}$  of DMSO was used in place of 2  $\mu\text{L}$  of FCCP in the latter case).

**8.2. Preferential ion selectivity assay using valinomycin** — The LUVs were prepared by following a similar procedure as discussed in the section 6.1.1. In this assay 20 mM HEPES buffer, pH 7.2 containing 100 mM KCl was used as the extravesicular buffer. To investigate the preferential ion selectivity, 2890  $\mu\text{L}$  of buffer solution (20 mM HEPES buffer, pH 7.2 containing 100 mM KCl), 50  $\mu\text{L}$  of 25 mM EYPC/CHOL-LUV $\Rightarrow$ HPTS and 50  $\mu\text{L}$  of 0.75 M NaOH were taken in a clean and dry fluorescence cuvette and the cuvette was placed in the fluorescence spectrophotometer under slow stirring condition for approximately 3 minutes. During this time a pH gradient of  $\sim 0.6$  gets generated between the extra and intra-vesicular system. The HPTS fluorescence intensity was monitored (at  $t = 0$  s) at  $\lambda_{\text{em}} = 510$  nm ( $\lambda_{\text{ex}} = 450$  nm). After addition of 8  $\mu\text{L}$  of the compound and 2  $\mu\text{L}$  of valinomycin (2.0 pM) at  $t = 50$  s, the kinetics was initiated and finally at  $t = 450$  s, the vesicles were lysed by adding 20  $\mu\text{L}$  of 20% Triton X-100 solution. The fluorescence intensity measurement was continued for further 50 s. The data was recorded once using valinomycin and again in absence of valinomycin (2  $\mu\text{L}$  of valinomycin was replaced with 2  $\mu\text{L}$  of DMSO in the latter case).

### **8.3. Evidence for mobile carrier mechanism**

**8.3.1. Cholesterol dependency assay**<sup>7</sup> — The LUVs were prepared according to the procedure mentioned in 5.1.2. by varying the molar ratios of EYPC and cholesterol as 6:4, 8:2 and 10:0 to delve into the fact whether increasing the cholesterol concentration in preparing the vesicles (cholesterol is known to increase the rigidity of the lipid bilayer) has any effect on the  $\text{Cl}^-$  ion transport activity of the compound. The chloride transport activity of the compound was measured using ISE. In case of a mobile carrier the transport activity was anticipated to decrease on increasing the molar ratio of cholesterol (increasing cholesterol slows the diffusion process) while for an ion channel mechanistic pathway no difference in transport activity should be there. For this assay similar procedure as described in section 6.2.3 was followed using three compositions of liposomes. No significant change was observed in the chloride ion transport activity indicating mobile carrier mechanism being followed by the compound.

**8.3.2. U-tube experiment** — The ‘U-tube’ experiment was performed to confirm the mechanistic pathway for the  $\text{Cl}^-$  ion transport. The lipid bilayer was mimicked here by using nitrobenzene as the organic layer. First, compound (0.2 mM) and  $\text{TBA}^+\text{PF}_6^-$  (2 mM) were dissolved in nitrobenzene (16 mL) and placed in a U-tube (1.5 cm cone with 15 cm arm length). The  $\text{TBA}^+\text{PF}_6^-$  (2 mM) was used to provide a counter anion for the transportation of  $\text{Cl}^-$  ion. In the source end 8 mL of 5 mM phosphate buffer at pH 7.2 containing 489 mM NaCl was used. In the receiver end 10 mL of 5 mM phosphate buffer at pH 7.2 containing 489 mM  $\text{NaNO}_3$  was used. The organic phase was stirred gently using a magnetic stirrer and the  $\text{Cl}^-$  ion concentration of the receiver end was monitored using a chloride ion selective electrode.

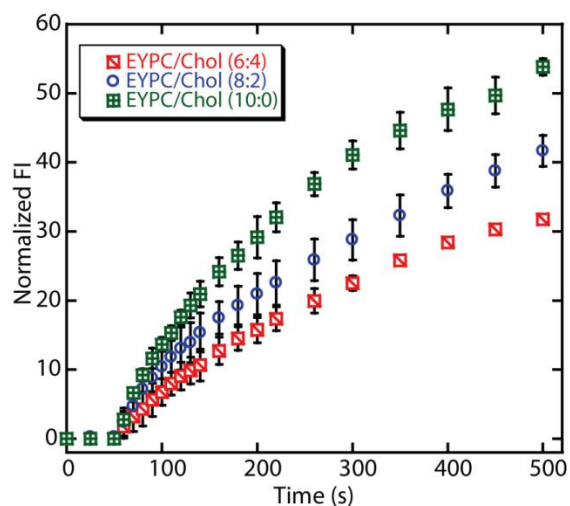

**Figure S10.** Effect of the concentration of cholesterol in the EYPC/cholesterol membrane on  $\text{Cl}^-$  ion transport activity of compound **3**.

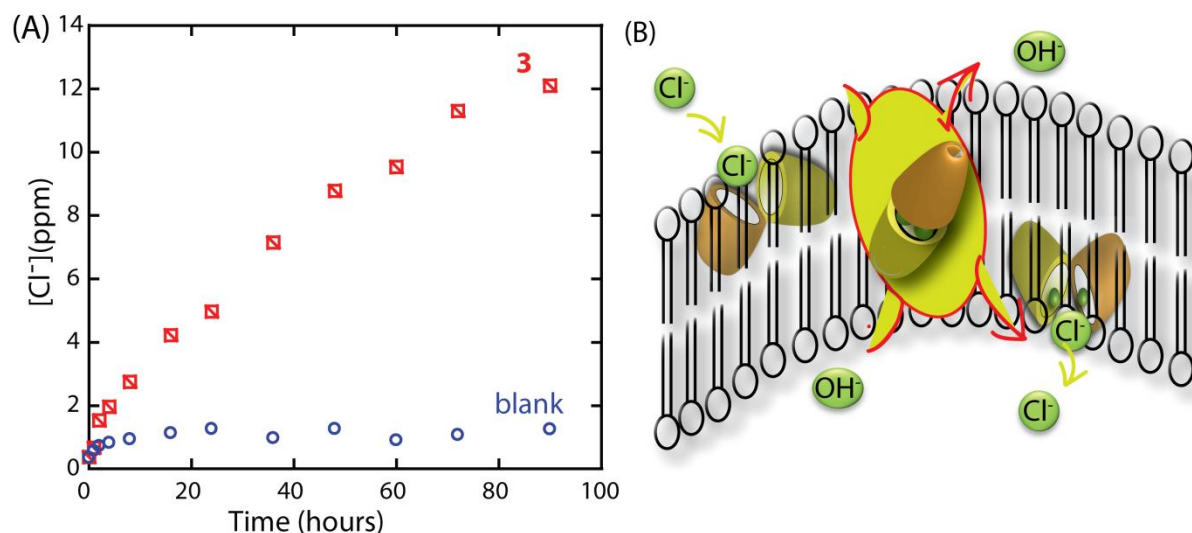

**Figure S11.** Measurement of the  $\text{Cl}^-$  ion transport efficacy by U-tube assay in the presence of compound **3**, using a chloride ISE and NaCl gradient (A). Schematic representation to illustrate the transport of  $\text{Cl}^-$  ion via carrier mechanism (B).

#### 8.4. Test for the leaching-out of the compounds from the membrane bilayer environment

<sup>7</sup>— To confirm that these synthetic compounds reside in the EYPCV/CHOL membrane bilayer and do not come out in the aqueous solution over the period of time, leaching test was performed. It is hypothesized that if the compounds leached out from the membrane bilayer environment to the aqueous medium then transport rate of the compounds will be greatly affected (reduced) by the dilution of the vesicular solution. Whereas dilution factor will not affect the transport rate if the compounds are localized inside the bilayer environment. For

this assay, various concentrations of EYPC/CHOL-LUV $\Delta$ HPTS and the buffer solution (20 mM HEPES and 100 mM NaCl, pH 7.2, final concentration of the vesicles were 300  $\mu$ M, 400  $\mu$ M, 500  $\mu$ M and 600  $\mu$ M respectively in each case) and 50  $\mu$ L of 0.75 M NaOH were taken in a clean and dry 3 mL fluorescence cuvette which was placed in a slow stirring condition for about 3 minutes followed by addition of the compound (10  $\mu$ L from the DMSO stock solution to maintain a fixed anionophore/lipid ratio in all cases) at  $t = 50$  s. The HPTS fluorescence intensity was monitored (at  $t = 0$  s) at  $\lambda_{em} = 510$  nm ( $\lambda_{ex} = 450$  nm). Finally at  $t = 450$  s, the vesicles were lysed by adding 20  $\mu$ L of 20% Triton X-100 solution. The fluorescence intensity measurement was continued for further 50 s. The results confirm that the compound remains in the lipid bilayer during the course of all our experiments.

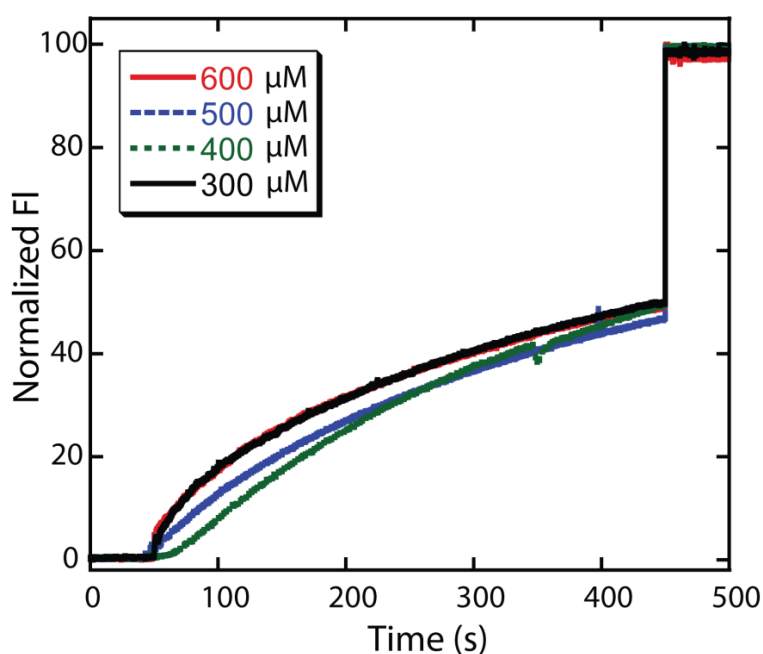

**Figure S12.** Leaching experiment of compound **3** (at compound to lipid ratio of 0.142 mol%).

### 9. Evidence of Vesicle Stability in the Presence of the Compounds:

*Calcein leakage assay*<sup>7</sup> — The vesicles were prepared according to the method described in section 6.1.1, with the exception that in this assay 50 mM calcein was used for the vesicle preparation (instead of 1 mM HPTS). For this assay, 2940  $\mu$ L of buffer (20 mM HEPES buffer and 34 mM Na<sub>2</sub>SO<sub>4</sub>) and 50  $\mu$ L of 25 mM EYPC/CHOL-LUV $\Delta$ calcein were taken in a clean and dry fluorescence cuvette and kept under a slow stirring condition for about 3 minutes. The calcein fluorescence intensity was monitored ( $t = 0$  s) at 520 nm ( $\lambda_{ex} = 490$  nm).

After  $t = 50$  s, compound (4 mol%) was added and the change in calcein fluorescence intensity were monitored using the fluorescence spectrophotometer. Finally the vesicles were lysed by adding 50  $\mu\text{L}$  of 20% Triton X-100 solution to the cuvette and the fluorescence measurement was carried out for further 50 s. The result shows that the synthetic compound didn't cause any disruption of the vesicles during the various assays performed (the vesicles were stable during the experimental conditions) and that no large channels were being formed in the EYPC/CHOL membrane, hence our transporter behave as a mobile carrier.

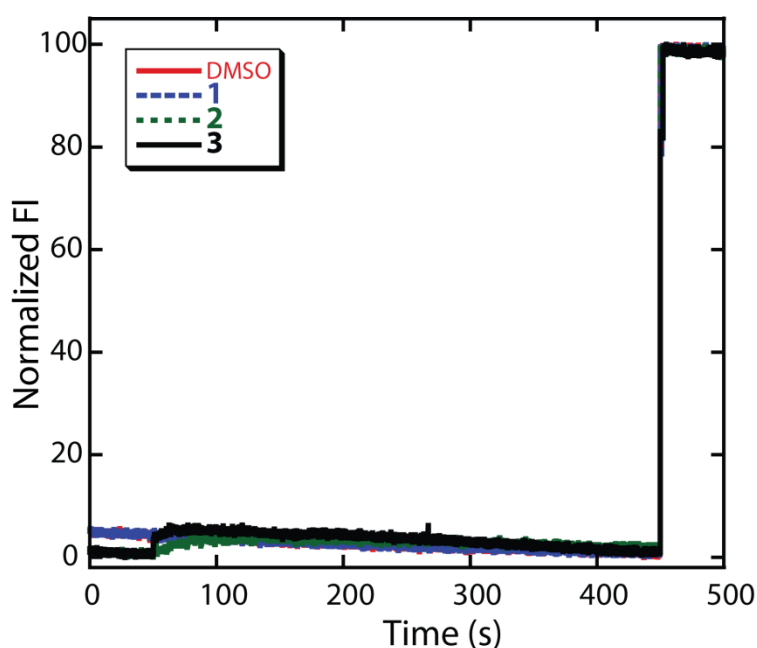

**Figure S13.** Extent of calcein leakage from the EYPC/CHOL-LUV $\supset$ calcein in the presence of compounds. After time  $t = 50$ , DMSO solutions of compound or DMSO (blank) was added and the fluorescence intensity ( $\lambda_{\text{ex}} = 490$  nm,  $\lambda_{\text{em}} = 520$  nm) was recorded. After  $t = 450$  sec the LUVs were lysed using triton X-100.

The leaching test confirmed the membrane localization of the compound (Figure S12). The non-leaky property of the calcein dye from the vesicles in the absence or presence of compounds confirms the integrity of the vesicles (Figure S13).

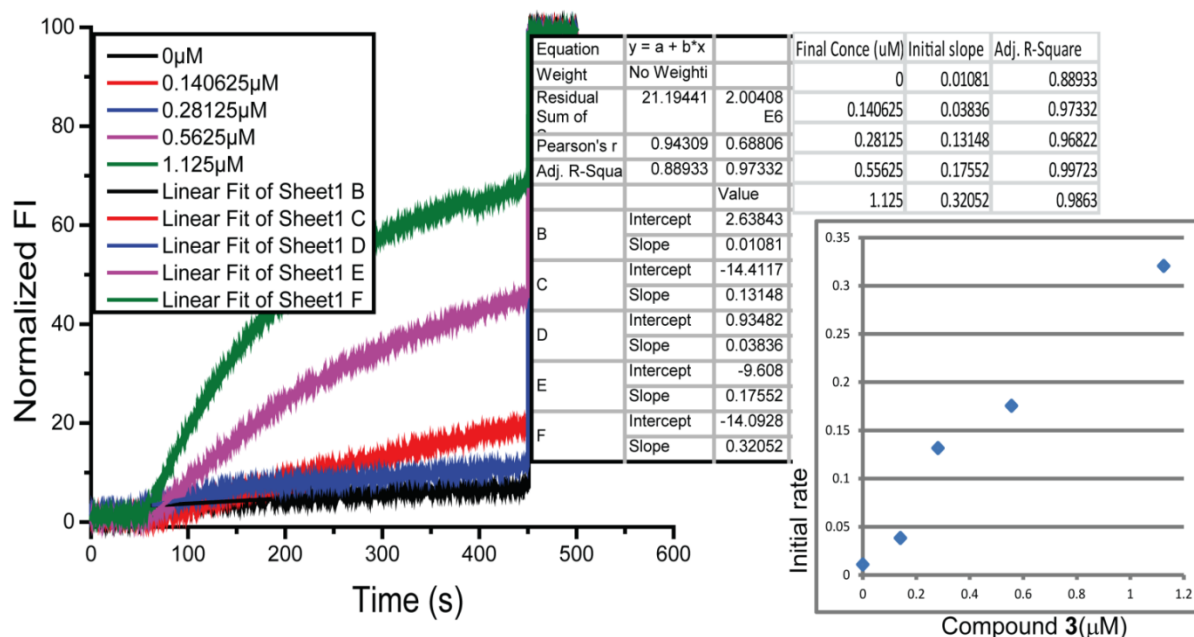

**Figure S14.** Calculation of the initial slope from the concentration dependent transport activities of compound 3. Plot of the initial rates of  $\text{Cl}^-$  ion transport activities at different concentrations of compound 3.

**Table S4.** Aqueous solubility of the selected compounds.

| Compound Code | Aqueous solubility (mg/mL) |
|---------------|----------------------------|
| <b>3</b>      | insoluble <sup>a</sup>     |
| <b>5</b>      | 2.0                        |
| <b>6</b>      | 3.3                        |
| <b>7</b>      | 4.0                        |
| <b>8</b>      | 2.5                        |
| <b>9</b>      | 3.3                        |

<sup>a</sup>insoluble in 1 mL water.

### 10. Regeneration of the Active Transporter by Dealkylation of the Proanionophores:

The tetrafluoroboratesulfonium salt **7** (1 mM) was dissolved in 10 mM PBS, pH 7.4 containing 10 mM reduced glutathione (GSH) and the mixture was incubated in 37 °C. At different time points, an aliquot of the reaction solution was removed and monitored by HPLC analysis. The aliquot was dissolved in methanol before its injection to the analytical HPLC (Waters 600E HPLC) system. The Hypersil GOLD™ C18 Selectivity LC Column and a UV-detector (214 nm) was used for the analysis. Methanol/water gradient (70%



methanol and 30% water) was used as the mobile phase at a flow rate of 1.0 mL/minute for 20 minutes run time. Regeneration of lead compound and reduction of sulfonium compound were analysed by inbuilt software and confirmed by ES-MS (ESI+).

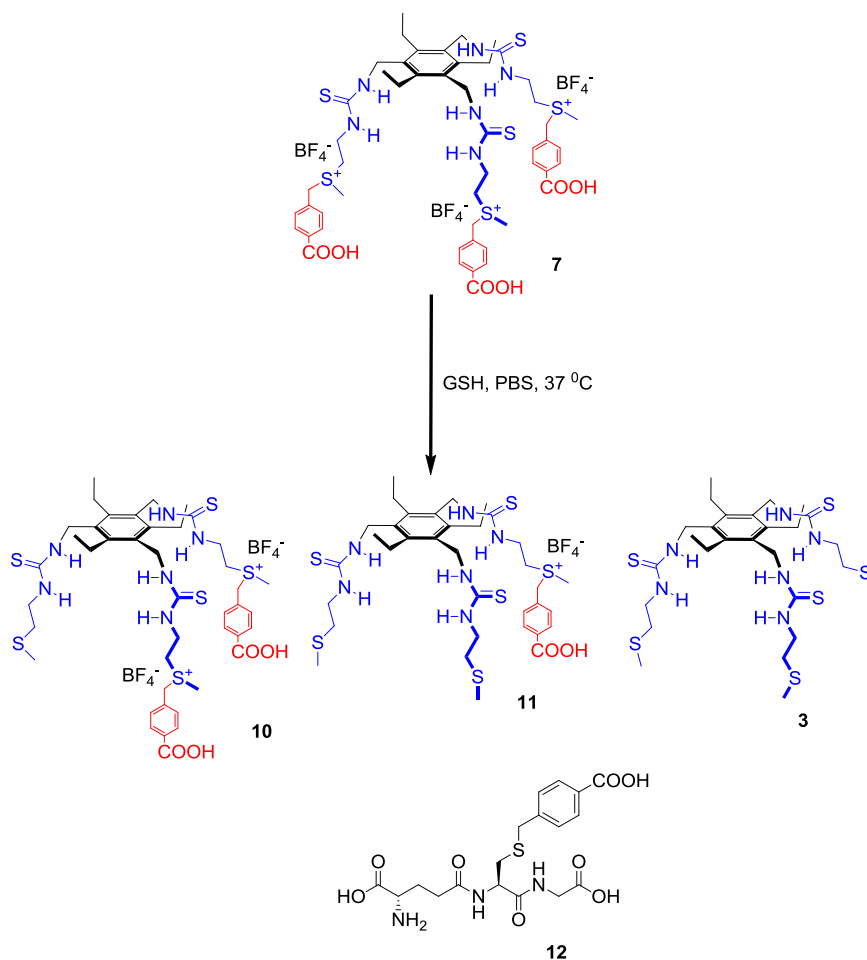

**Figure S15.** Reaction of compound **7** in the presence of GSH in PBS at 37 °C. Regeneration of compound **3** and formation of mono- (**10**) and di-dealkylated (**11**) intermediates and GSH derivative (**12**).

|                    |                    |                               |         |                        |                                 |
|--------------------|--------------------|-------------------------------|---------|------------------------|---------------------------------|
| <b>Sample Name</b> | SAMPLE             | <b>Position</b>               | P1-D11  | <b>Instrument Name</b> | Instrument 1                    |
| <b>User Name</b>   |                    | <b>Inj Vol</b>                | 20      | <b>InjPosition</b>     |                                 |
| <b>Sample Type</b> | Sample             | <b>IRM Calibration Status</b> | Success | <b>Data Filename</b>   | DI-ADUCT-HPLC.d                 |
| <b>ACQ Method</b>  | ESI ALS 200-1500.m | <b>Comment</b>                |         | <b>Acquired Time</b>   | 17-05-2019 12:54:29 (UTC+05:30) |

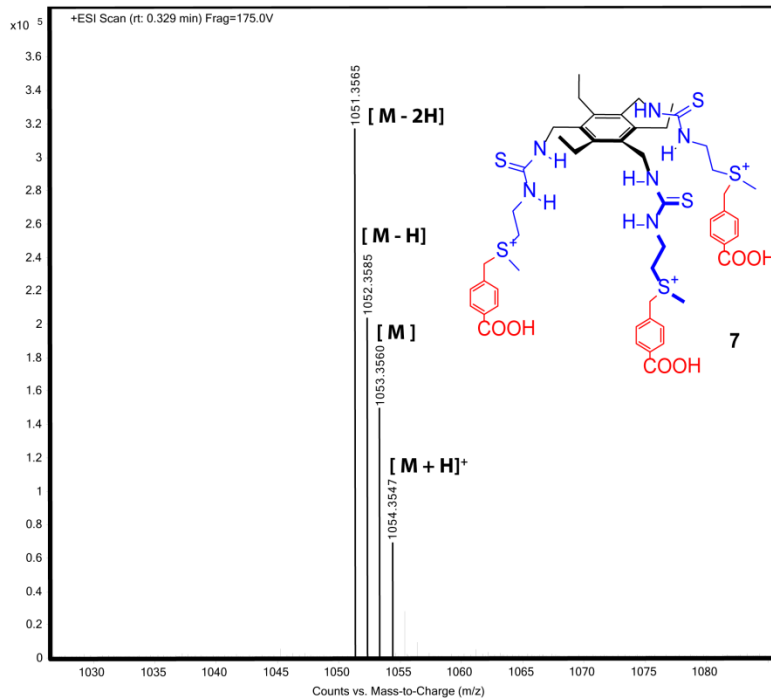

|                    |                    |                               |         |                        |                                 |
|--------------------|--------------------|-------------------------------|---------|------------------------|---------------------------------|
| <b>Sample Name</b> | SAMPLE 11          | <b>Position</b>               | P2-A6   | <b>Instrument Name</b> | Instrument 1                    |
| <b>User Name</b>   |                    | <b>Inj Vol</b>                | 20      | <b>InjPosition</b>     |                                 |
| <b>Sample Type</b> | Sample             | <b>IRM Calibration Status</b> | Success | <b>Data Filename</b>   | EXP-M-ADD-HPLC.d                |
| <b>ACQ Method</b>  | ESI ALS 100-1500.m | <b>Comment</b>                |         | <b>Acquired Time</b>   | 22-05-2019 16:10:55 (UTC+05:30) |

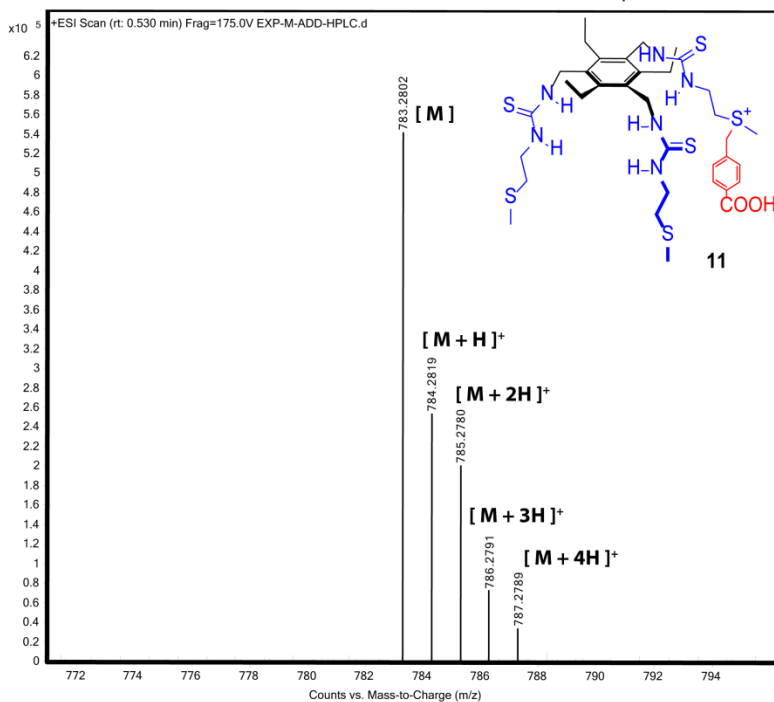

**Figure S16.** Mass spectral signals of compounds **7** and **11** (in water) after separation by HPLC analyses.

|                    |                    |                               |         |                        |                                 |
|--------------------|--------------------|-------------------------------|---------|------------------------|---------------------------------|
| <b>Sample Name</b> | SAMPLE 10          | <b>Position</b>               | P2-A5   | <b>Instrument Name</b> | Instrument 1                    |
| <b>User Name</b>   |                    | <b>Inj Vol</b>                | 20      | <b>InjPosition</b>     |                                 |
| <b>Sample Type</b> | Sample             | <b>IRM Calibration Status</b> | Success | <b>Data Filename</b>   | EXP-DI-ADD-HPLC.d               |
| <b>ACQ Method</b>  | ESI ALS 100-1500.m | <b>Comment</b>                |         | <b>Acquired Time</b>   | 22-05-2019 16:09:01 (UTC+05:30) |

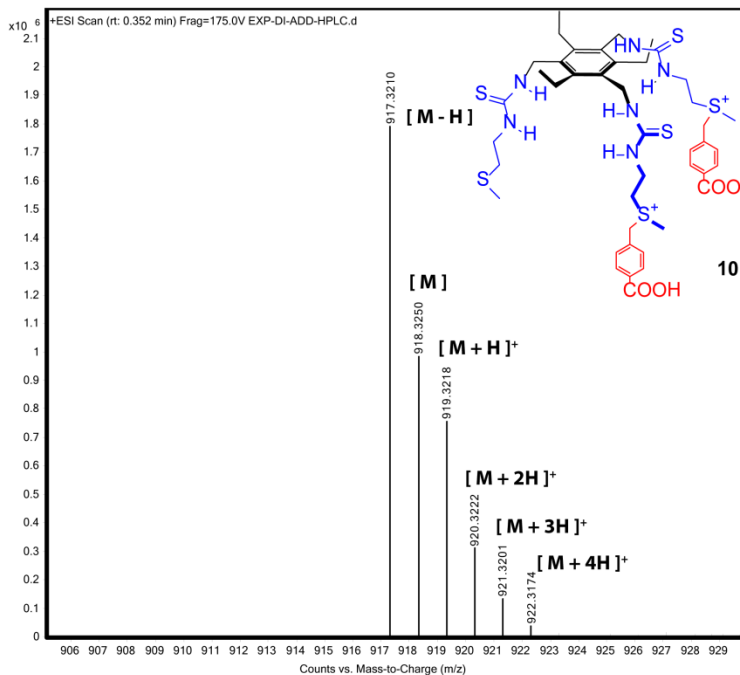

|                    |                    |                               |         |                        |                                 |
|--------------------|--------------------|-------------------------------|---------|------------------------|---------------------------------|
| <b>Sample Name</b> | SAMPLE 13          | <b>Position</b>               | P2-A8   | <b>Instrument Name</b> | Instrument 1                    |
| <b>User Name</b>   |                    | <b>Inj Vol</b>                | 20      | <b>InjPosition</b>     |                                 |
| <b>Sample Type</b> | Sample             | <b>IRM Calibration Status</b> | Success | <b>Data Filename</b>   | EXP-MAIN-HPLC.d                 |
| <b>ACQ Method</b>  | ESI ALS 100-1500.m | <b>Comment</b>                |         | <b>Acquired Time</b>   | 22-05-2019 16:14:41 (UTC+05:30) |

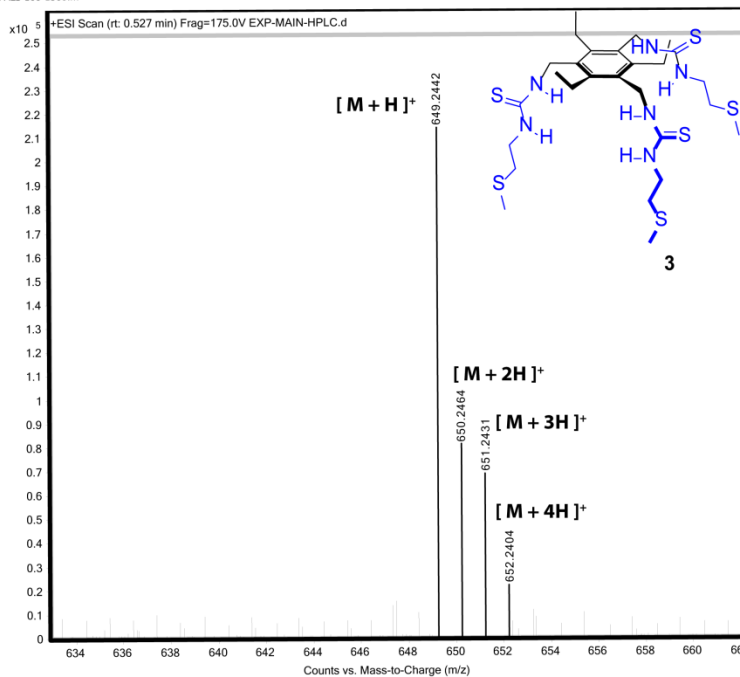

**Figure S17.** Mass spectral signals of compounds **10** and **3** (in water) after separation by HPLC analyses.

|                    |                    |                               |         |                        |                                 |
|--------------------|--------------------|-------------------------------|---------|------------------------|---------------------------------|
| <b>Sample Name</b> | SAMPLE 12          | <b>Position</b>               | P2-A7   | <b>Instrument Name</b> | Instrument 1                    |
| <b>User Name</b>   |                    | <b>Inj Vol</b>                | 20      | <b>InjPosition</b>     |                                 |
| <b>Sample Type</b> | Sample             | <b>IRM Calibration Status</b> | Success | <b>Data Filename</b>   | EXP-FNT-HPLC.d                  |
| <b>ACQ Method</b>  | ESI ALS 100-1500.m | <b>Comment</b>                |         | <b>Acquired Time</b>   | 22-05-2019 16:12:49 (UTC+05:30) |

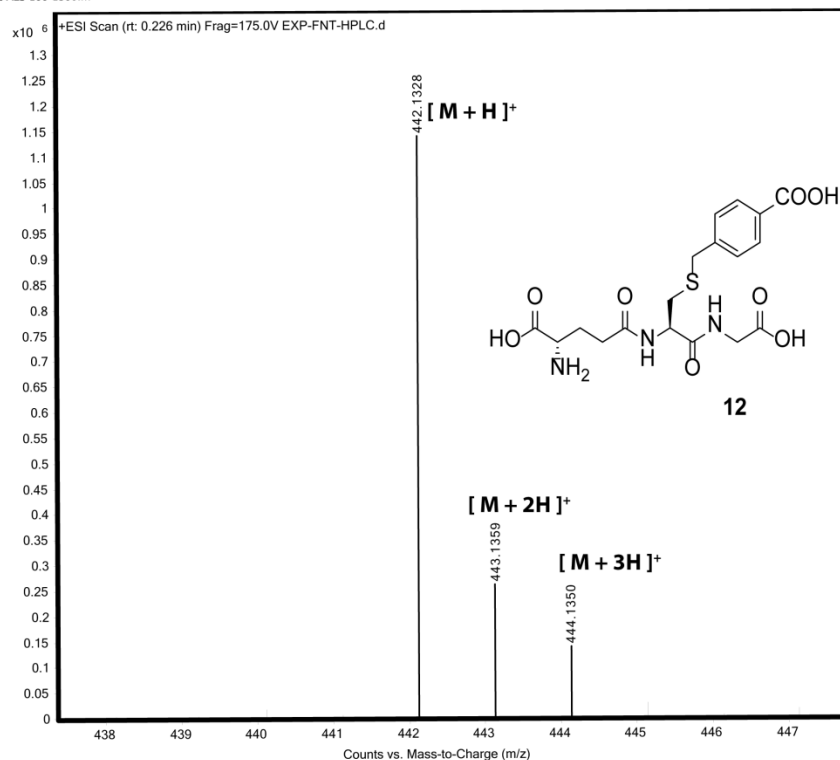

**Figure S18.** Mass spectral signals of GSH derivative, **12** in water (from reaction mixture).

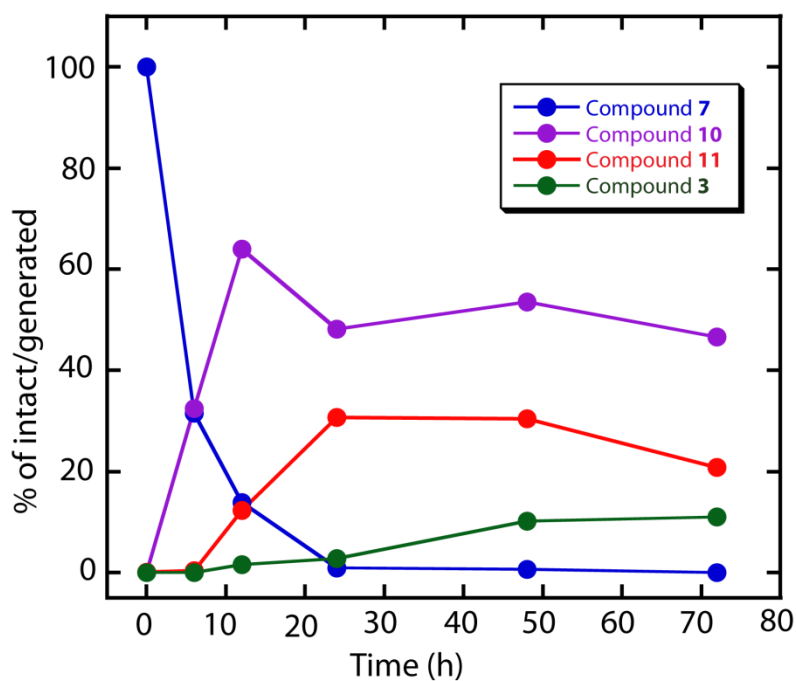

**Figure S19.** Plot of dealkylated compounds at different time intervals.

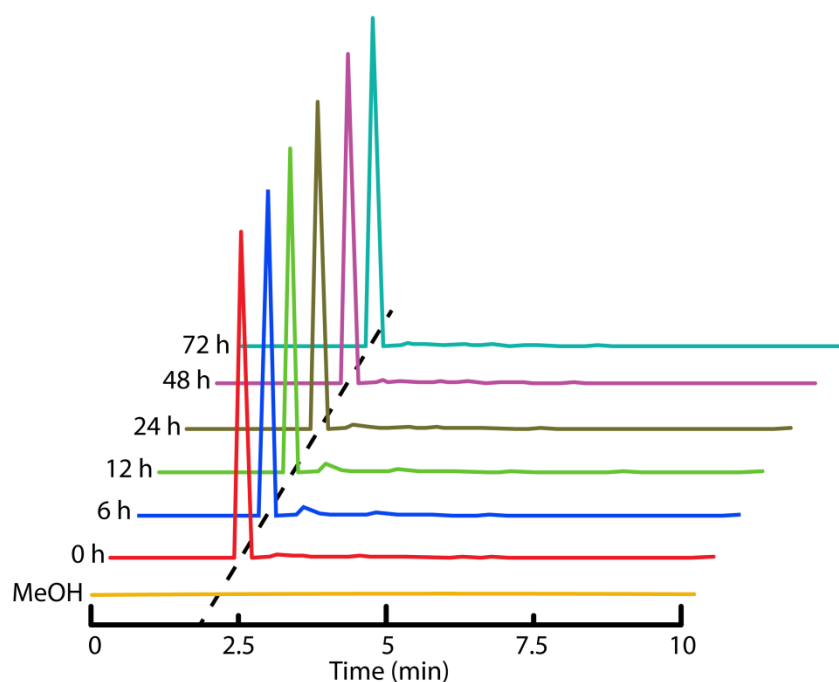

**Figure S20.** HPLC traces of compound **7** at different time intervals in the absence of GSH.

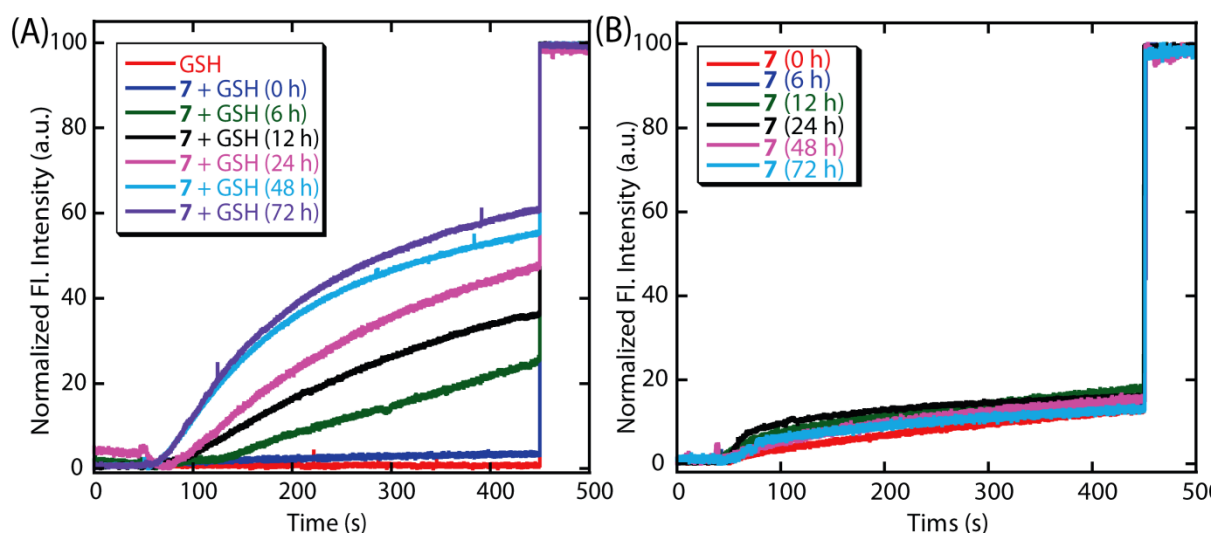

**Figure S21.** Transport of  $\text{Cl}^-$  ion by the regenerated compound **3** in the presence of GSH at different time intervals (A). Transport of  $\text{Cl}^-$  ion by the compound **7** in the absence of GSH at different time intervals (B).

## 11. Biological Activities of the Compounds:

**11.1. MTT-based cytotoxicity assay**<sup>7</sup> – HeLa, BHK-21 and MDCK cells were seeded in a 96-well flat bottom tissue culture plates at a density of  $10^4$  cells/well (per 100  $\mu\text{L}$ ) in Dulbecco's modified Eagle medium (DMEM) containing 10% fetal bovine serum (FBS). The cells were incubated in three different plate at 37  $^\circ\text{C}$  and 5%  $\text{CO}_2$  for 16 h. The media was discarded and

each well was washed with PBS. The compounds were added with media to each well in different concentrations (0, 5, 10, 20, 40, and 80  $\mu\text{M}$ ) and incubated. At every 24 hours intervals, MTT solution (10  $\mu\text{L}$  of 5 mg MTT/mL of PBS) was added in each plate and cells were incubated for 4 hours. MTT containing media was removed from each well and 100  $\mu\text{L}$  of DMSO was added (in each well) to dissolve the formazan crystals. The absorbance was recorded in a microplate reader (Multiskan™ GO) at the wavelength of 570 nm. All experiments were performed in triplicate, and the relative cell viability (%) was expressed as a percentage relative to the untreated cells.

**11.2. Measurement  $\text{Cl}^-$  transport in the presence of the compounds<sup>9</sup>** – Transport of  $\text{Cl}^-$  ion in presence of compound into the HeLa cell was measured by using chloride selective cell permeable fluorescent dye *N*- (ethoxycarbonylmethyl)-6 methoxyquinolinium bromide (MQAE). Cells were seeded in a 96-well flat bottom tissue culture treated plates at density of  $10^4$  cells/well (per 100  $\mu\text{L}$ ) and incubated at 37 °C, and 5%  $\text{CO}_2$  for 16 hours. The plain DMEM with MQAE dye added to each well by maintaining final concentration as 5 mM for 4 hours. Cells were washed with PBS to remove the extracellular dye and compound was added in plain DMEM at three different concentrations (10 and 20  $\mu\text{M}$ ) and incubate for 4 hours then visualized a fluorescence microscope (Thermo Fisher Scientific) using a blue channel.

**11.3. Cellular uptake of the compounds** – The uptake of NBD-tagged compounds was also investigated under the cellular environment. The HeLa cells were seeded on cover slip and incubate for 16 hours at 37 °C and 5%  $\text{CO}_2$ . After the incubation period the media was removed and washed three-times with PBS. The NBD-tagged compounds were added at 50 and 100  $\mu\text{M}$  concentrations, and incubated for additional 4 hours. The cells were then washed three-times with PBS and fixation was performed with 4% formaldehyde at room temperature for 10 minutes. After that, cells were washed 3-4 times and the slides were prepared for microscopic (both confocal and fluorescence) analyses

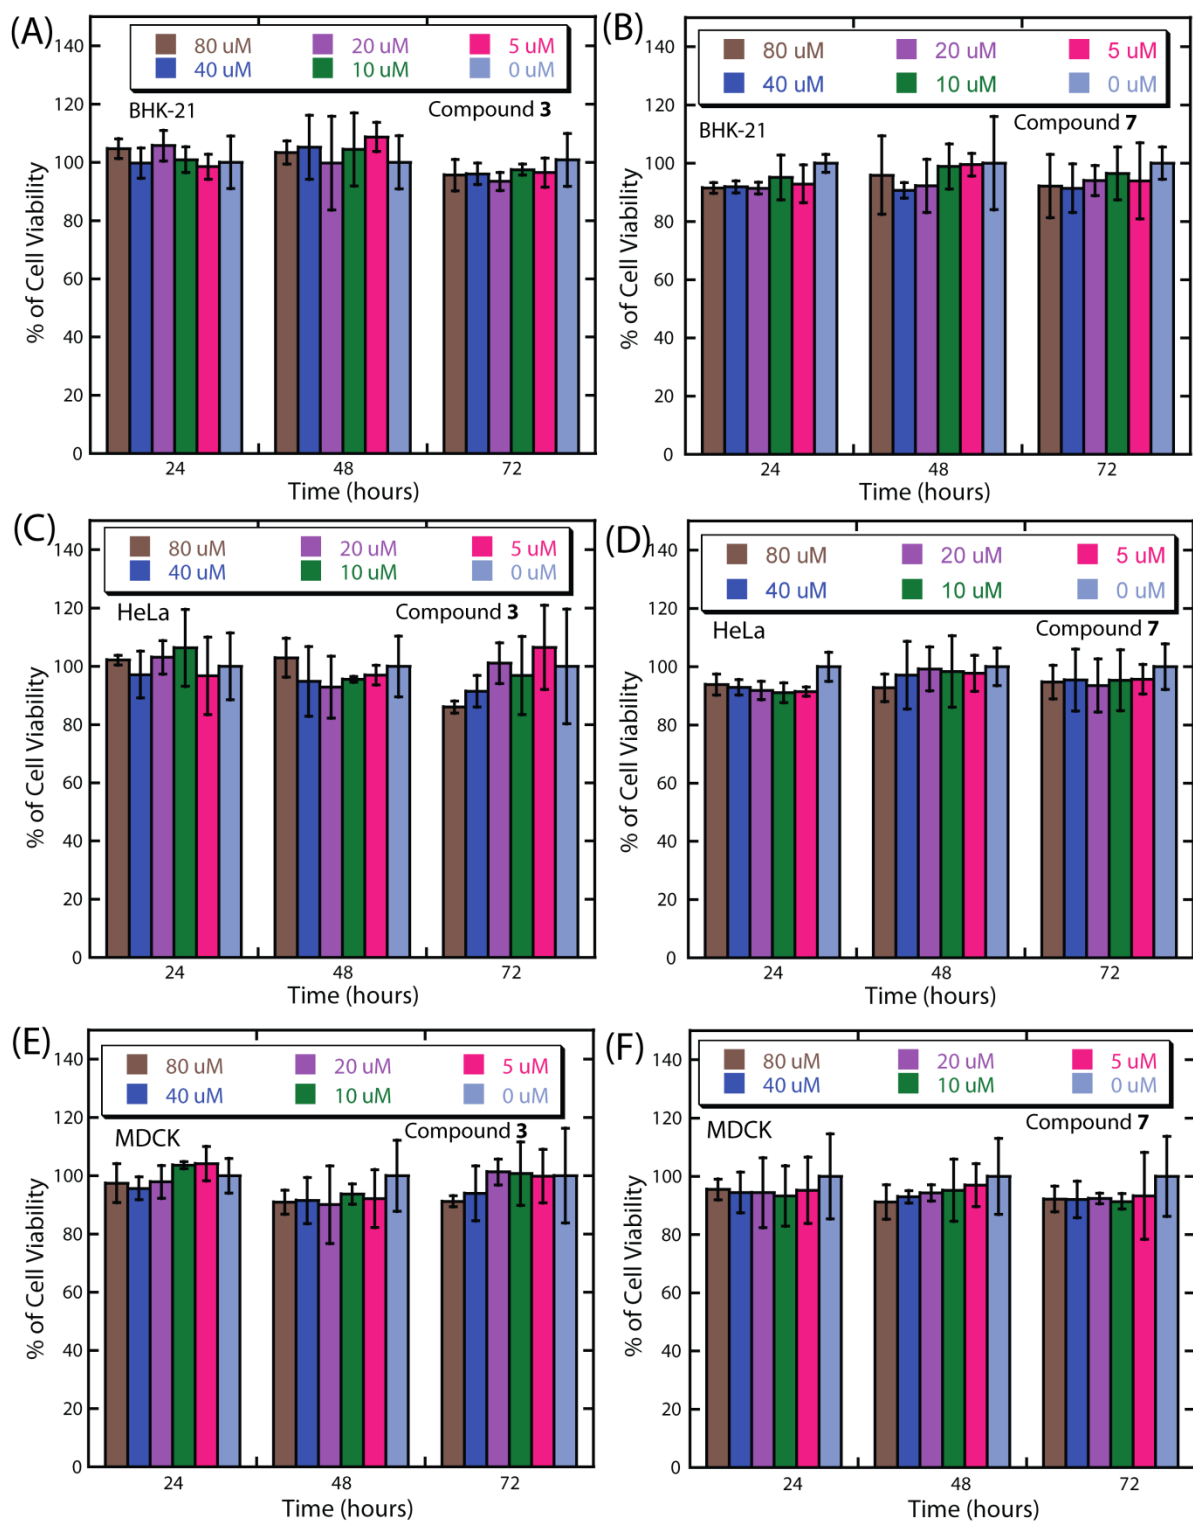

**Figure S22.** Cell viability of the compounds **3** and **7** was measured at different concentrations of 0-80  $\mu\text{M}$ . Cell viability was measured in BHK-21, HeLa and MDCK cells after 24, 48 and 72 hours of compound treatment. All experiments were performed in triplicates.



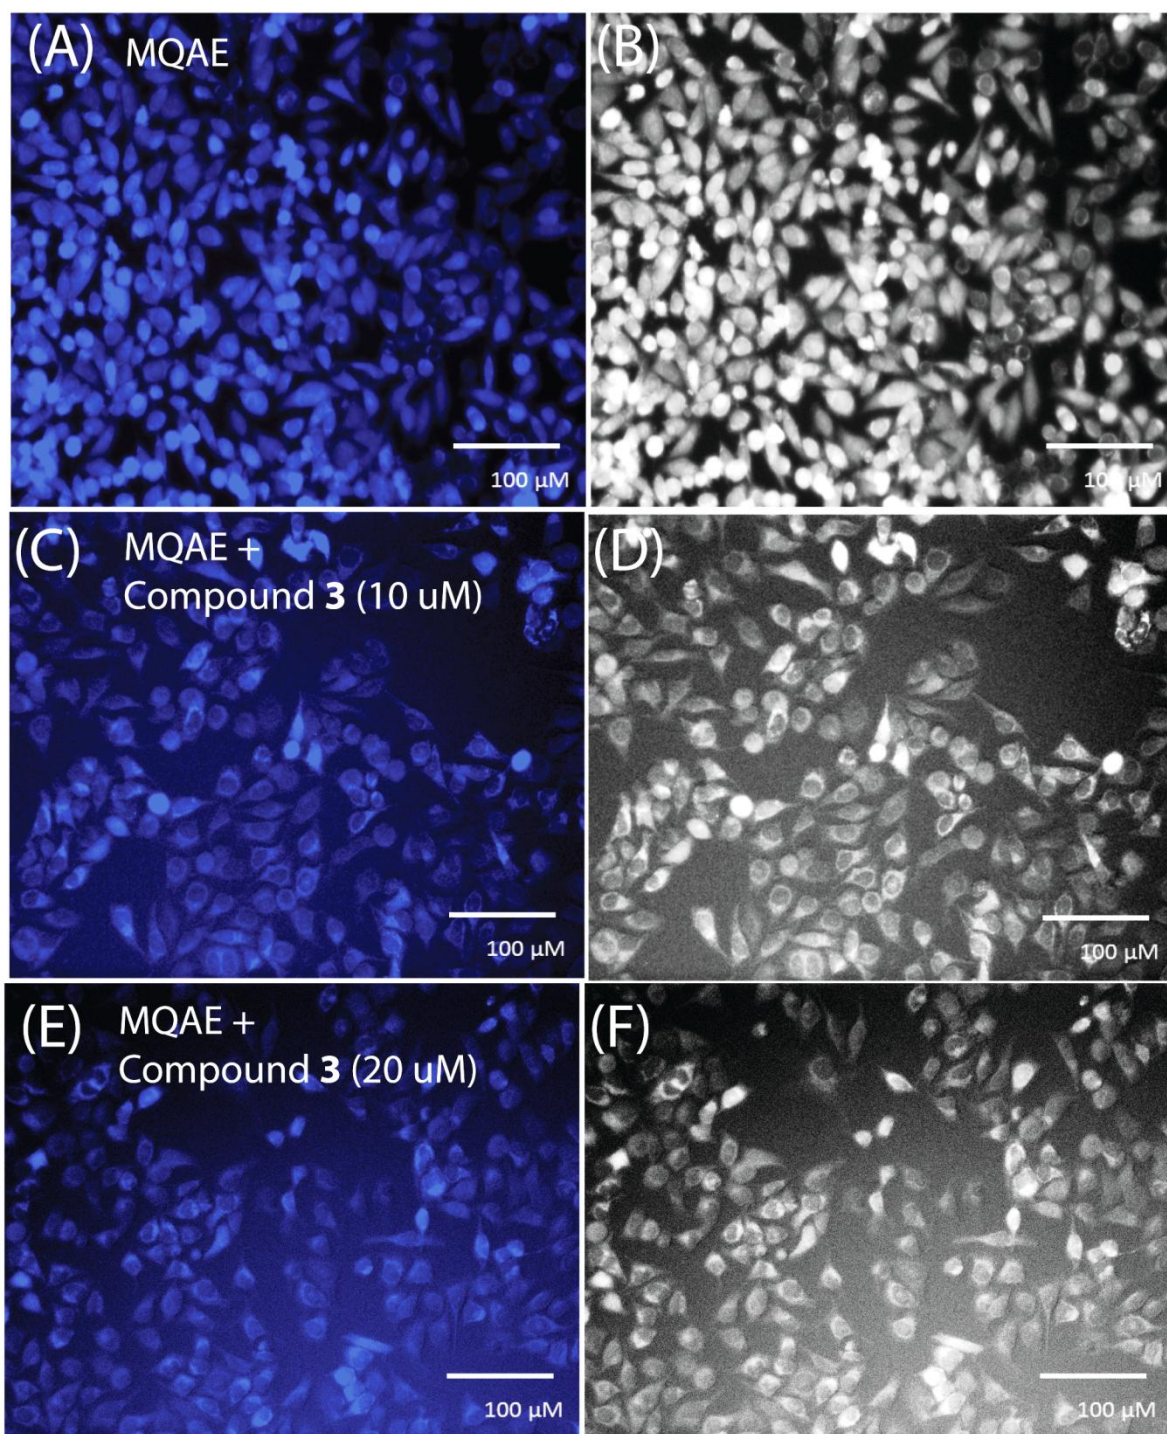

**Figure S23.** Fluorescence microscopic images of the MQAE dye ( $\lambda_{\text{ex}} = 350 \text{ nm}$  and  $\lambda_{\text{em}} = 460 \text{ nm}$ ) labelled HeLa cells in the absence and presence of the compound **3**. Both blue channel (A, C and E) and grey channel (B, D and F) illustrate the fluorescence intensity of the MQAE dye in the absence and presence of the compound **3**.



## 12. Transport of Chloride Ion across Giant Unilamellar Vesicles (GUVs):

**12.1. Preparation of GUVs<sup>II</sup>** — In a clean and dry glass vial EYPC, cholesterol and DPPS (from the respective stock solution) were taken in the molar ratio of 6:3.5:0.5 and dried under vacuum for 6 hours. To that lipid film, 200  $\mu$ L of light liquid paraffin oil was added and the mixture was sonicated for 30 minutes; until the lipid film gets fully dissolved in the paraffin oil. After that, 20  $\mu$ L of the upper buffer (100 mM HEPES, 200 mM sucrose, 1 mM 8-hydroxypyrene-1,3,6-trisulfonic acid (HPTS) in H<sub>2</sub>O, pH = 7.4) was added and the solution was mixed thoroughly to form an emulsion. The emulsion was then carefully added to 500  $\mu$ L of lower buffer (100 mM HEPES, 200 mM glucose in H<sub>2</sub>O, pH = 7.4) in a centrifuge tube and the whole mixture was pipetted up and down thoroughly to mix everything. The emulsion was centrifuged for 15 minutes at 10000 rpm to remove the oil as well as the extravehicular free dye. This process was repeated for 4-5 times to remove maximum amount of the paraffin oil from the solution. The final pellet (dense solution containing the GUVs) was mixed with 100  $\mu$ L of lower buffer (final vesicle conc. of 15 mM).

**12.2. Ion transport measurements using GUVs coated on the glass surface** — The coated glass surface was prepared by following the reported method with minor modifications. In an acid washed glass vial, *N*-(3,4-dihydroxyphenethyl)palmitamide and DPPS solutions were taken in the molar ratio of 1:4 and dried under reduced pressure for 6 hours to remove any traces of organic solvents. The lipid mixture was then dissolved in 0.1 mL of THF/water (9:1 v/v) and the solution was added to 0.9 mL of 5 mM PBS buffer, pH 5.6 (final conc. of 0.2 mM). The solution was then sonicated for 5 minutes. The prepared vesicle solution was directly used for the glass coating. The vesicle solution was drop casted on the surface of a glass bottom disk and incubated for overnight at 37 °C. Finally, the substrate was washed by HEPES buffer thoroughly.

The prepared GUV solution (100  $\mu$ L) and compound **3** were added on the hydrophobic coated glass bottom dish. The GUVs were allowed to settle down for 5 hours. After that, NaCl solution (0.1 M) was added. The images were recorded (in a Nikon ECLIPSE Ts2R fluorescence microscope) before and after the addition of NaCl in the green as well as in the bright field channel to ensure the integrity of the GUVs and quenching of HPTS fluorescence intensity. Here the decay of the HPTS fluorescence intensity is due to Cl<sup>-</sup> influx and consequently OH<sup>-</sup> efflux (as compound follow OH<sup>-</sup>/Cl<sup>-</sup> antiport mechanism for its chloride transport activity).

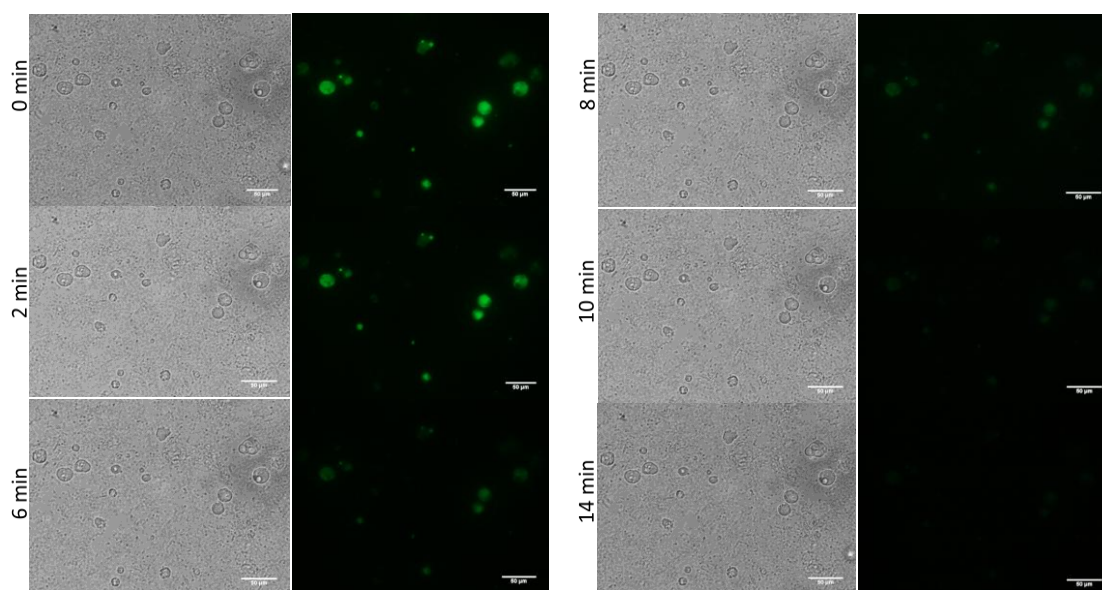

**Figure S24.** Fluorescence microscopic images of the HPTS loaded GUVs were recorded at different time intervals (0, 2, 10, 20, and 30 minutes), after the addition of compound **3** and NaCl (0.1 M). The change in integrity of the GUVs and encapsulated HPTS fluorescence intensity were monitored using bright-field and green channels, respectively.

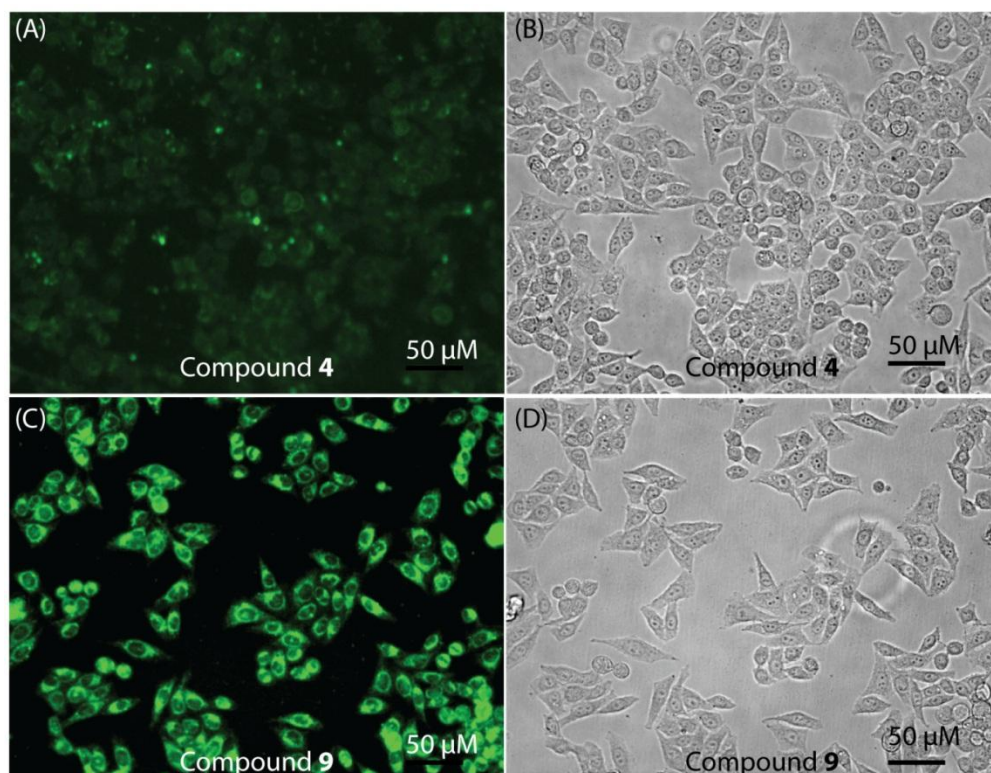

**Figure S25.** Fluorescence microscopic images of the HeLa cells treated with NBD-labelled compounds **4** and **9**. Green channel illustrating compound uptake, bright field illustrating the cell morphology.

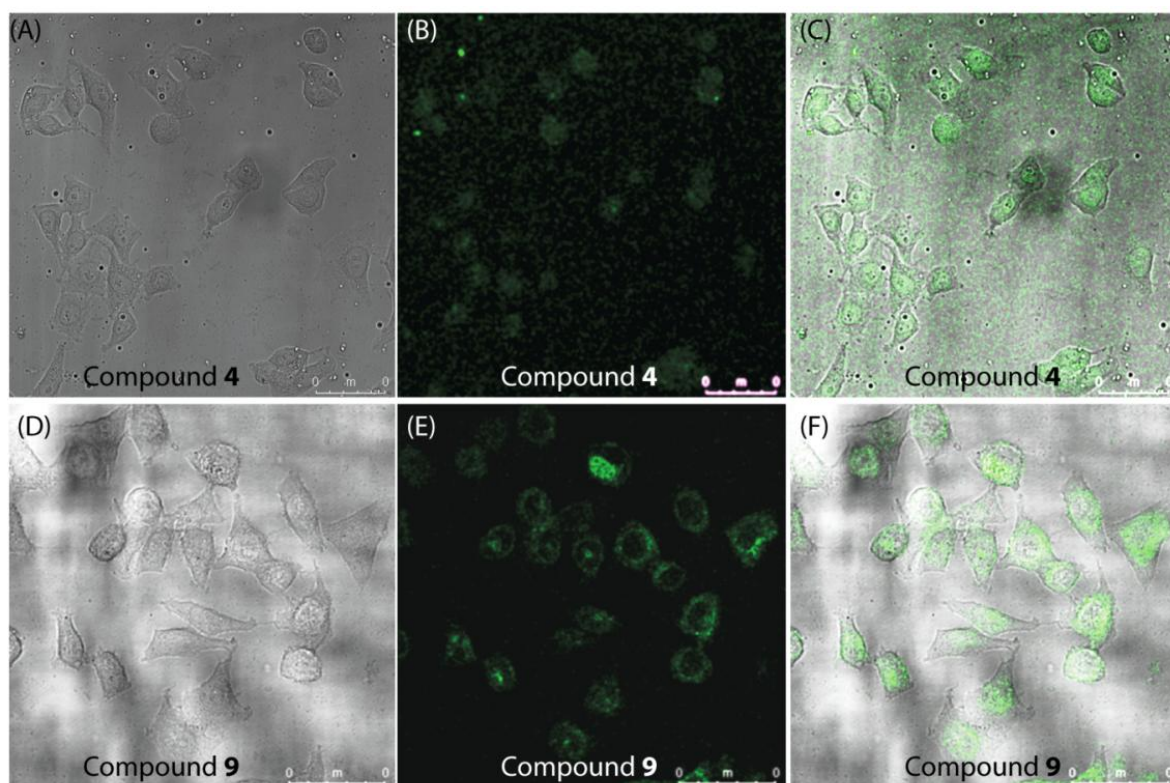

**Figure S26.** Confocal microscopic images of the HeLa cells treated with NBD-labelled compounds **4** and **9**. Green channel illustrating compound uptake, bright field illustrating the cell morphology, merge of green and bright field channels illustrating cell morphology in the presence of NBD-labelled compounds.

### **13. Regeneration of Anionophore from Proanionophore under Cellular Environments:**

HeLa cells were been cultured in T25 culture flasks containing Dulbecco's Modified Eagle's Medium (DMEM) (Gibco) along with 10% fetal bovine serum (FBS), 1% L-glutamine, 1% penicillin/streptomycin, and 1% pyruvate (Gibco), maintaining at 37 °C in a humidified atmosphere with 5% CO<sub>2</sub>. Cells were re-cultured and maintained for further study. The cells are counted using trypan blue stain using Countess II FL Automated Cell counter (Thermo Fisher Scientific). In order to examine the effect of GSH and GSH inhibitor,  $5 \times 10^6$  cells/well were seeded onto six well plate and maintained in DMEM media containing 10% FBS. After 12 h the cells were washed twice with PBS and treated with external GSH (10 mM) and GSH inhibitor (1 mM) in serum free media for 12 h, after incubation period GSH and GSH inhibitor were aspirated and replaced with media containing 2%FBS. After 72 h the media was aspirated and washed twice with PBS. The cells were harvested by centrifugation at 480g for 10 min. The cell pellet were washed twice with ice-cold PBS and kept on ice. The pellets

were re-suspended in 1 mL of the lysis buffer (150 mM NaCl + 50mM Tris-Cl (pH 7.4) and incubated in ice for 15 min. The lysate was centrifuged at 20,000g for 10 min at 4<sup>0</sup>C. The supernatant was removed carefully in a fresh tube and the samples were used for further experiments.

Later, matrix-assisted laser desorption/ionization time of flight (MALDI-TOF) mass spectrometry (Autoflex speed, Bruker, Germany) analysis was carried out to conform the formation of aninophore and intermediates. The HeLa cell lysates were mixed with matrix (Sinapinic acid) as 1:1 ratio for the MALDI-TOF analysis.

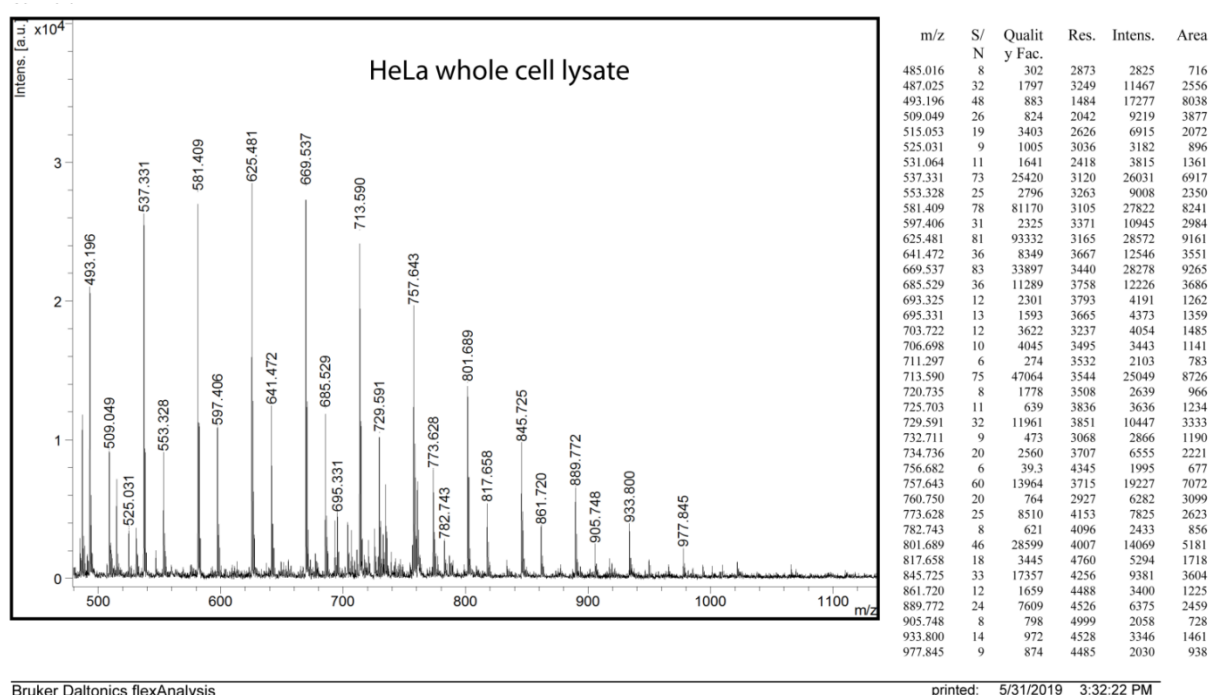

**Figure S27.** MALDI-TOF mass spectral analysis of HeLa whole cell lysate.



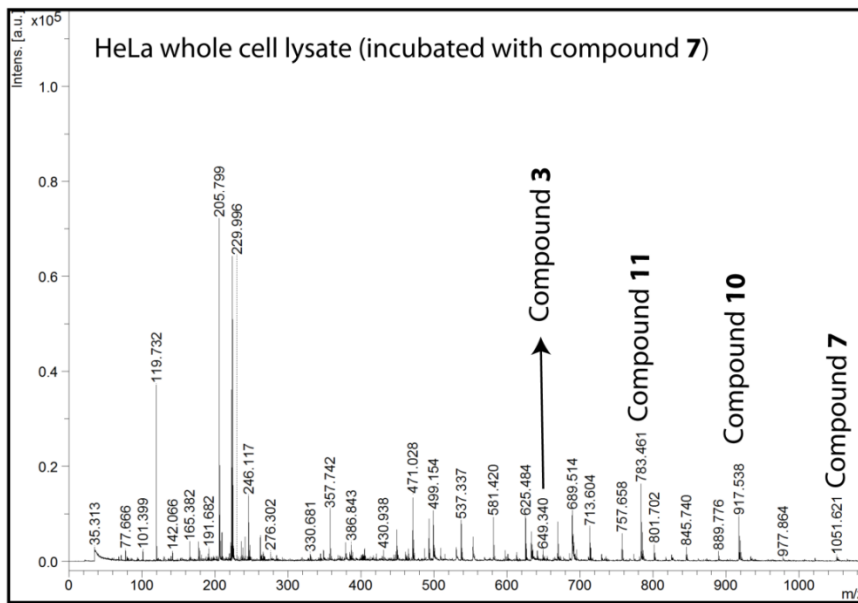

| m/z     | S/N | Quality Fac. | Res. | Intens. | Area |
|---------|-----|--------------|------|---------|------|
| 35.313  | 26  | 169          | 95.5 | 2624    | 1142 |
| 36.861  | 17  | 298          | 29.2 | 2173    | 2470 |
| 38.678  | 9   | 144          | 58.4 | 1328    | 657  |
| 39.683  | 7   | 190          | 41.7 | 1220    | 841  |
| 71.592  | 9   | 845          | 900  | 1155    | 1111 |
| 77.666  | 16  | 3539         | 1019 | 2028    | 181  |
| 101.399 | 17  | 3807         | 1767 | 2225    | 156  |
| 119.732 | 282 | 77594        | 1982 | 37225   | 2717 |
| 129.786 | 6   | 267          | 1513 | 841     | 88.7 |
| 140.031 | 7   | 303          | 1296 | 954     | 141  |
| 142.066 | 13  | 325          | 1996 | 1784    | 147  |
| 165.382 | 26  | 1982         | 2401 | 3861    | 333  |
| 177.524 | 25  | 4050         | 2379 | 3838    | 340  |
| 178.541 | 12  | 317          | 2483 | 1956    | 161  |
| 179.563 | 12  | 352          | 2682 | 1944    | 149  |
| 181.572 | 7   | 274          | 3302 | 1129    | 83.4 |
| 190.679 | 7   | 377          | 1310 | 1206    | 232  |
| 191.682 | 15  | 943          | 2321 | 2398    | 240  |
| 205.799 | 434 | 173230       | 2107 | 71376   | 9125 |
| 206.818 | 78  | 15871        | 3158 | 12963   | 1091 |
| 209.616 | 35  | 14158        | 1543 | 5923    | 1049 |
| 219.945 | 9   | 144          | 3166 | 1528    | 122  |
| 221.935 | 22  | 274          | 2709 | 3682    | 373  |
| 222.948 | 212 | 30792        | 2457 | 35737   | 4144 |
| 223.964 | 359 | 129645       | 2314 | 60571   | 7622 |
| 224.988 | 58  | 6581         | 3280 | 9847    | 883  |
| 229.996 | 6   | 359          | 2167 | 1104    | 152  |
| 236.059 | 23  | 1536         | 2683 | 3971    | 439  |
| 238.092 | 15  | 703          | 2502 | 2636    | 306  |
| 241.304 | 29  | 7702         | 3087 | 5057    | 595  |
| 246.117 | 77  | 29118        | 2818 | 13406   | 1528 |
| 248.138 | 17  | 1550         | 2717 | 3037    | 378  |
| 262.190 | 32  | 12260        | 2746 | 5579    | 743  |
| 264.247 | 7   | 302          | 2318 | 1208    | 175  |
| 266.261 | 10  | 181          | 3282 | 1892    | 201  |
| 276.302 | 6   | 207          | 1622 | 1135    | 268  |
| 330.681 | 6   | 80.7         | 2164 | 1207    | 227  |
| 344.692 | 8   | 310          | 4160 | 1576    | 182  |
| 348.766 | 11  | 301          | 2913 | 2221    | 369  |

Bruker Daltonics flexAnalysis

printed: 5/31/2019 3:36:43 PM

**Figure S28.** MALDI-TOF mass spectral analysis of HeLa whole cell lysate. The HeLa cells were incubated with compound 7 (50  $\mu$ M).

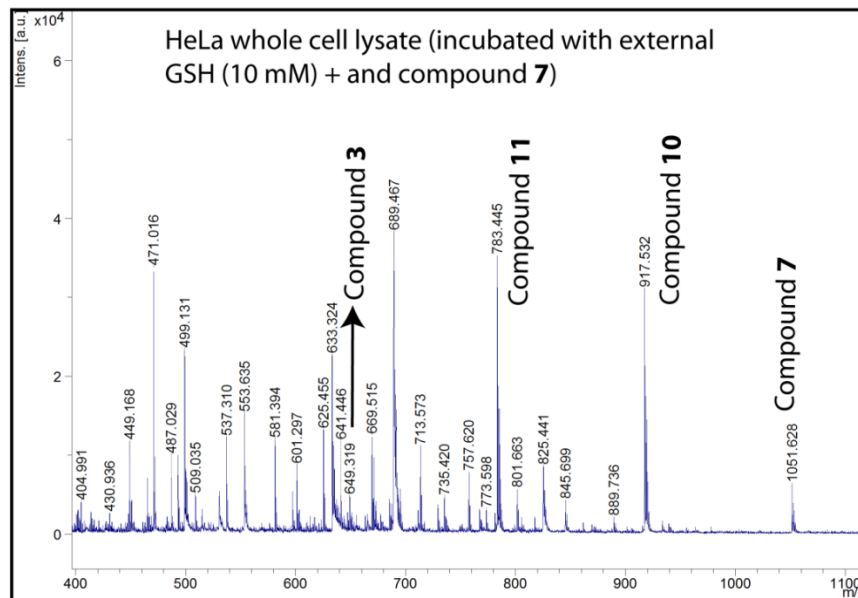

| m/z     | S/N | Quality Fac. | Res. | Intens. | Area  |
|---------|-----|--------------|------|---------|-------|
| 71.588  | 67  | 12465        | 1467 | 6243    | 372   |
| 77.670  | 57  | 8840         | 1703 | 5447    | 285   |
| 94.047  | 53  | 6553         | 1928 | 5599    | 308   |
| 96.083  | 23  | 6745         | 2075 | 2455    | 136   |
| 110.359 | 19  | 3232         | 2210 | 2299    | 130   |
| 119.721 | 77  | 42935        | 2002 | 9792    | 704   |
| 122.608 | 20  | 10037        | 1740 | 2579    | 222   |
| 138.833 | 20  | 5829         | 1716 | 3093    | 305   |
| 142.056 | 12  | 2545         | 2222 | 1903    | 151   |
| 149.122 | 14  | 2366         | 2188 | 2360    | 208   |
| 155.040 | 11  | 1248         | 1897 | 1964    | 192   |
| 165.368 | 22  | 6742         | 2063 | 4105    | 424   |
| 177.509 | 24  | 5622         | 2012 | 5167    | 584   |
| 179.543 | 9   | 265          | 1834 | 2029    | 247   |
| 181.578 | 10  | 282          | 2239 | 2163    | 208   |
| 191.670 | 13  | 895          | 2566 | 3009    | 283   |
| 197.794 | 31  | 1911         | 2442 | 7435    | 790   |
| 199.823 | 10  | 322          | 2601 | 2394    | 239   |
| 205.789 | 336 | 174602       | 1823 | 83490   | 12559 |
| 206.802 | 68  | 14958        | 2361 | 16980   | 1952  |
| 209.610 | 26  | 6270         | 1412 | 6653    | 1279  |
| 209.879 | 41  | 10222        | 3007 | 10310   | 890   |
| 210.902 | 13  | 729          | 4131 | 3475    | 224   |
| 212.938 | 9   | 1538         | 2770 | 2504    | 245   |
| 214.977 | 19  | 1710         | 2403 | 5076    | 602   |
| 221.914 | 18  | 891          | 2342 | 4877    | 636   |
| 222.932 | 162 | 42123        | 2259 | 42827   | 5647  |
| 223.950 | 248 | 84337        | 2061 | 65480   | 9590  |
| 224.969 | 45  | 5711         | 2474 | 11909   | 1483  |
| 236.049 | 13  | 2619         | 2368 | 3618    | 460   |
| 238.073 | 14  | 1042         | 2909 | 3962    | 406   |
| 241.288 | 581 | 184050       | 3180 | 161208  | 16244 |
| 246.103 | 82  | 30973        | 2430 | 23199   | 3191  |
| 248.129 | 13  | 1526         | 1973 | 3841    | 657   |
| 252.243 | 6   | 433          | 4599 | 1976    | 134   |
| 262.179 | 38  | 25615        | 2867 | 11231   | 1415  |
| 267.369 | 65  | 24593        | 4042 | 19456   | 1644  |
| 284.340 | 12  | 880          | 1916 | 3796    | 698   |
| 330.694 | 8   | 98.8         | 3766 | 2698    | 289   |

Bruker Daltonics flexAnalysis

printed: 6/6/2019 3:50:02 PM

**Figure S29.** MALDI-TOF mass spectral analysis of HeLa whole cell lysate. The HeLa cells were incubated with external GSH (10 mM) and compound 7 (50  $\mu$ M).

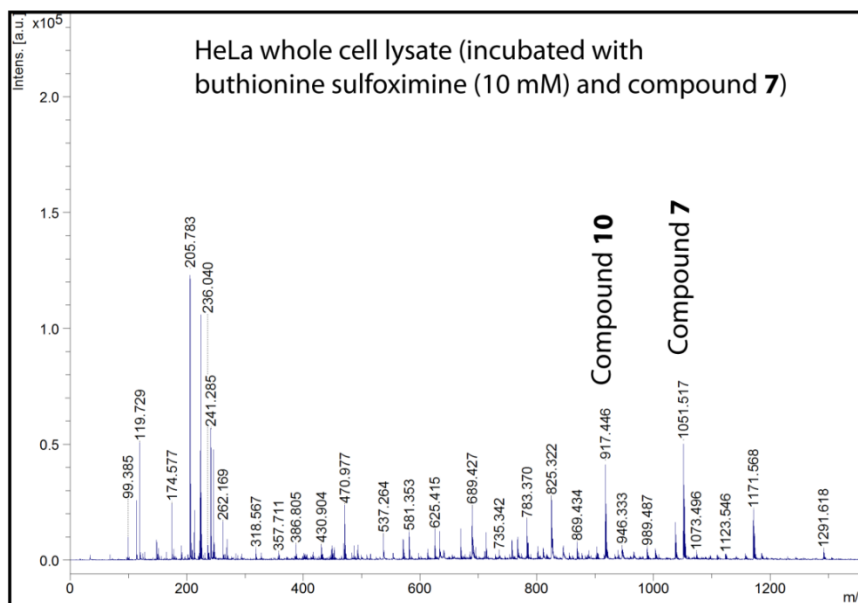

| m/z     | S/N | Quality Fac. | Res. | Intens. | Area  |
|---------|-----|--------------|------|---------|-------|
| 99.385  | 92  | 85418        | 1615 | 10076   | 727   |
| 113.685 | 202 | 46563        | 1890 | 25234   | 1806  |
| 119.729 | 384 | 102444       | 1832 | 50722   | 3922  |
| 124.864 | 19  | 3967         | 1775 | 2604    | 215   |
| 127.945 | 24  | 4396         | 2071 | 3380    | 253   |
| 148.195 | 53  | 13836        | 2236 | 8601    | 686   |
| 150.218 | 15  | 644          | 1942 | 2429    | 216   |
| 151.266 | 29  | 6337         | 1820 | 4754    | 479   |
| 165.374 | 17  | 1477         | 1848 | 3019    | 358   |
| 174.577 | 125 | 36452        | 2493 | 24014   | 2042  |
| 177.564 | 24  | 457          | 1130 | 4610    | 841   |
| 190.757 | 29  | 6692         | 2055 | 5902    | 666   |
| 191.669 | 16  | 1793         | 2267 | 3293    | 373   |
| 201.897 | 10  | 187          | 2103 | 2208    | 254   |
| 205.783 | 571 | 189999       | 2064 | 125576  | 16223 |
| 206.805 | 98  | 17521        | 2786 | 21590   | 2002  |
| 209.600 | 17  | 2497         | 1363 | 3922    | 802   |
| 212.964 | 94  | 25963        | 2492 | 20975   | 2237  |
| 221.912 | 36  | 3283         | 2684 | 8398    | 899   |
| 222.928 | 196 | 29159        | 2603 | 45366   | 4948  |
| 223.945 | 439 | 105728       | 2344 | 101336  | 12506 |
| 224.964 | 81  | 15743        | 3176 | 18904   | 1797  |
| 231.103 | 12  | 877          | 1909 | 2863    | 433   |
| 236.040 | 29  | 2643         | 2574 | 6847    | 805   |
| 238.066 | 14  | 835          | 2186 | 3275    | 469   |
| 241.285 | 235 | 170884       | 2742 | 56202   | 6486  |
| 245.067 | 16  | 742          | 2633 | 3987    | 515   |
| 246.089 | 197 | 111856       | 2684 | 47371   | 5754  |
| 262.169 | 67  | 55770        | 3116 | 16570   | 1759  |
| 266.255 | 9   | 329          | 3149 | 2199    | 219   |
| 268.213 | 23  | 6656         | 2779 | 5698    | 719   |
| 269.348 | 36  | 6279         | 2822 | 9053    | 1091  |
| 284.305 | 11  | 991          | 2057 | 2696    | 493   |
| 294.401 | 10  | 815          | 2329 | 2443    | 439   |
| 318.567 | 19  | 3858         | 3096 | 5009    | 690   |
| 327.610 | 10  | 409          | 2924 | 2742    | 388   |
| 357.711 | 12  | 1652         | 2990 | 3246    | 529   |
| 386.805 | 23  | 8993         | 3310 | 6575    | 1054  |
| 400.833 | 9   | 1481         | 3741 | 2597    | 398   |

Bruker Daltonics flexAnalysis

printed: 6/6/2019 2:33:30 PM

**Figure S30.** MALDI-TOF mass spectral analysis of HeLa whole cell lysate. The HeLa cells were incubated with buthionine sulfoximine (BSO; 1 mM) and compound 7 (50 μM).

## 14. NMR- Spectra of the Synthesized Compounds

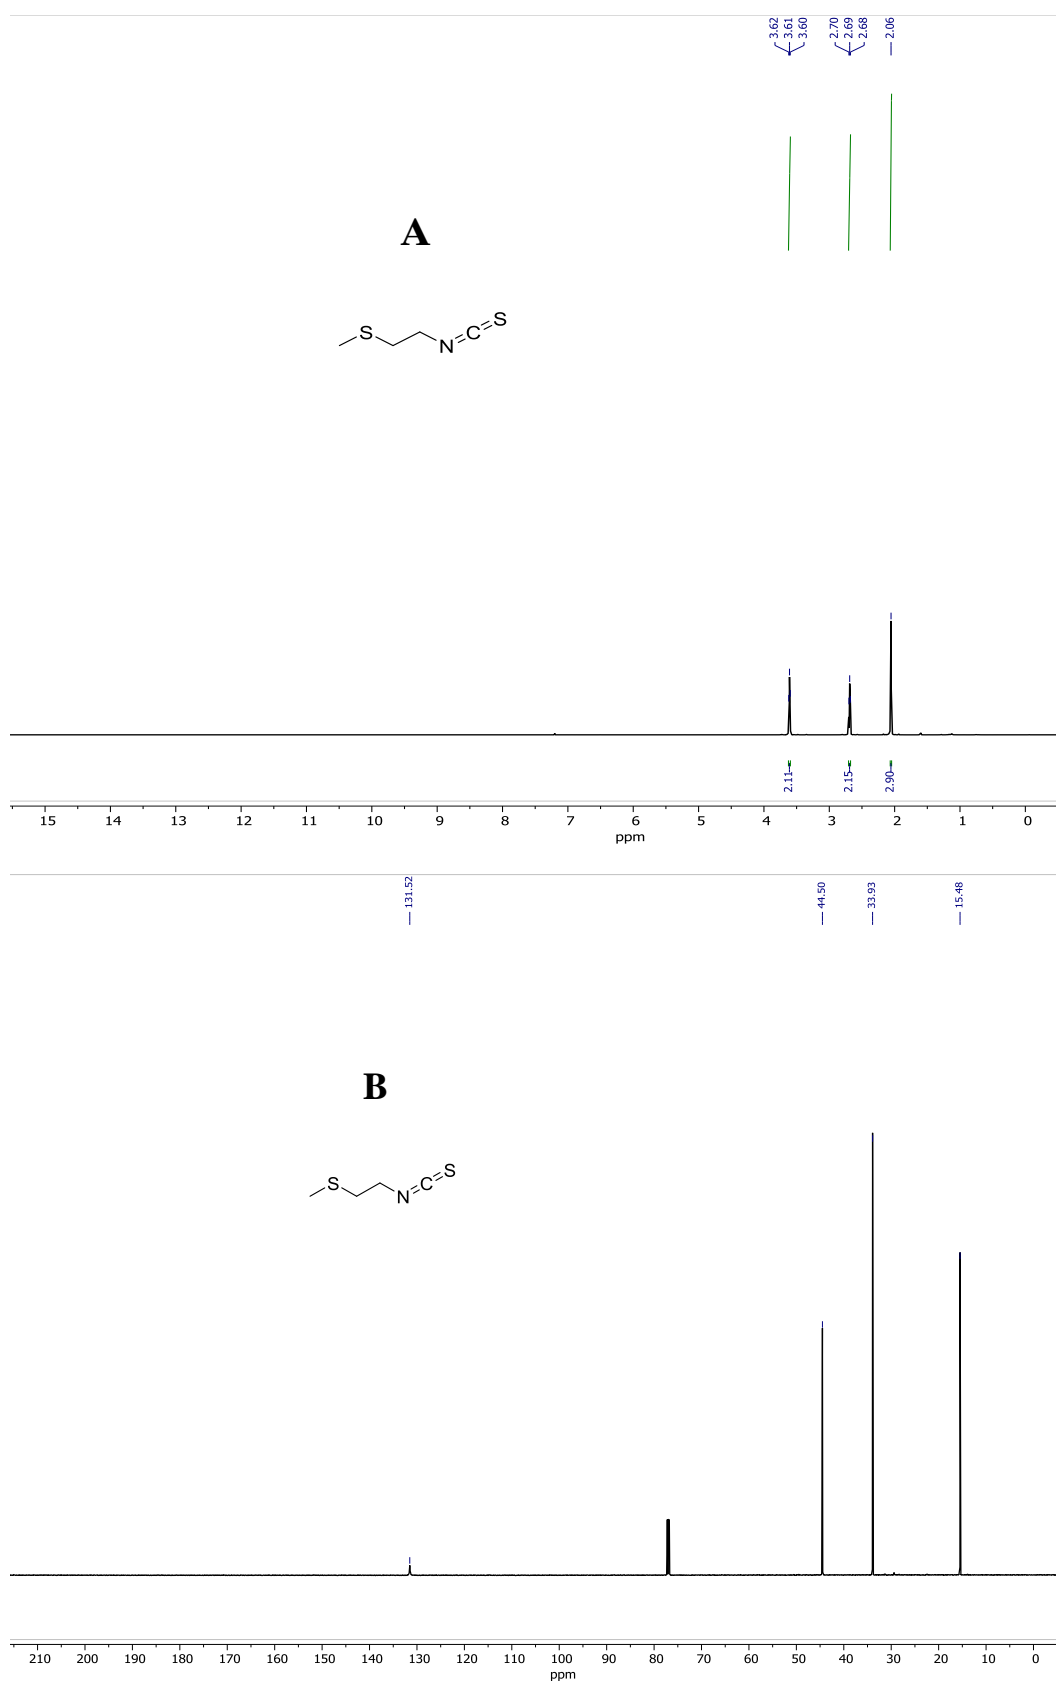

**Figure S31:**  $^1\text{H}$  NMR (A) and  $^{13}\text{C}$  NMR (B) spectra of (2-isothiocyanatoethyl)(methyl)sulfane.

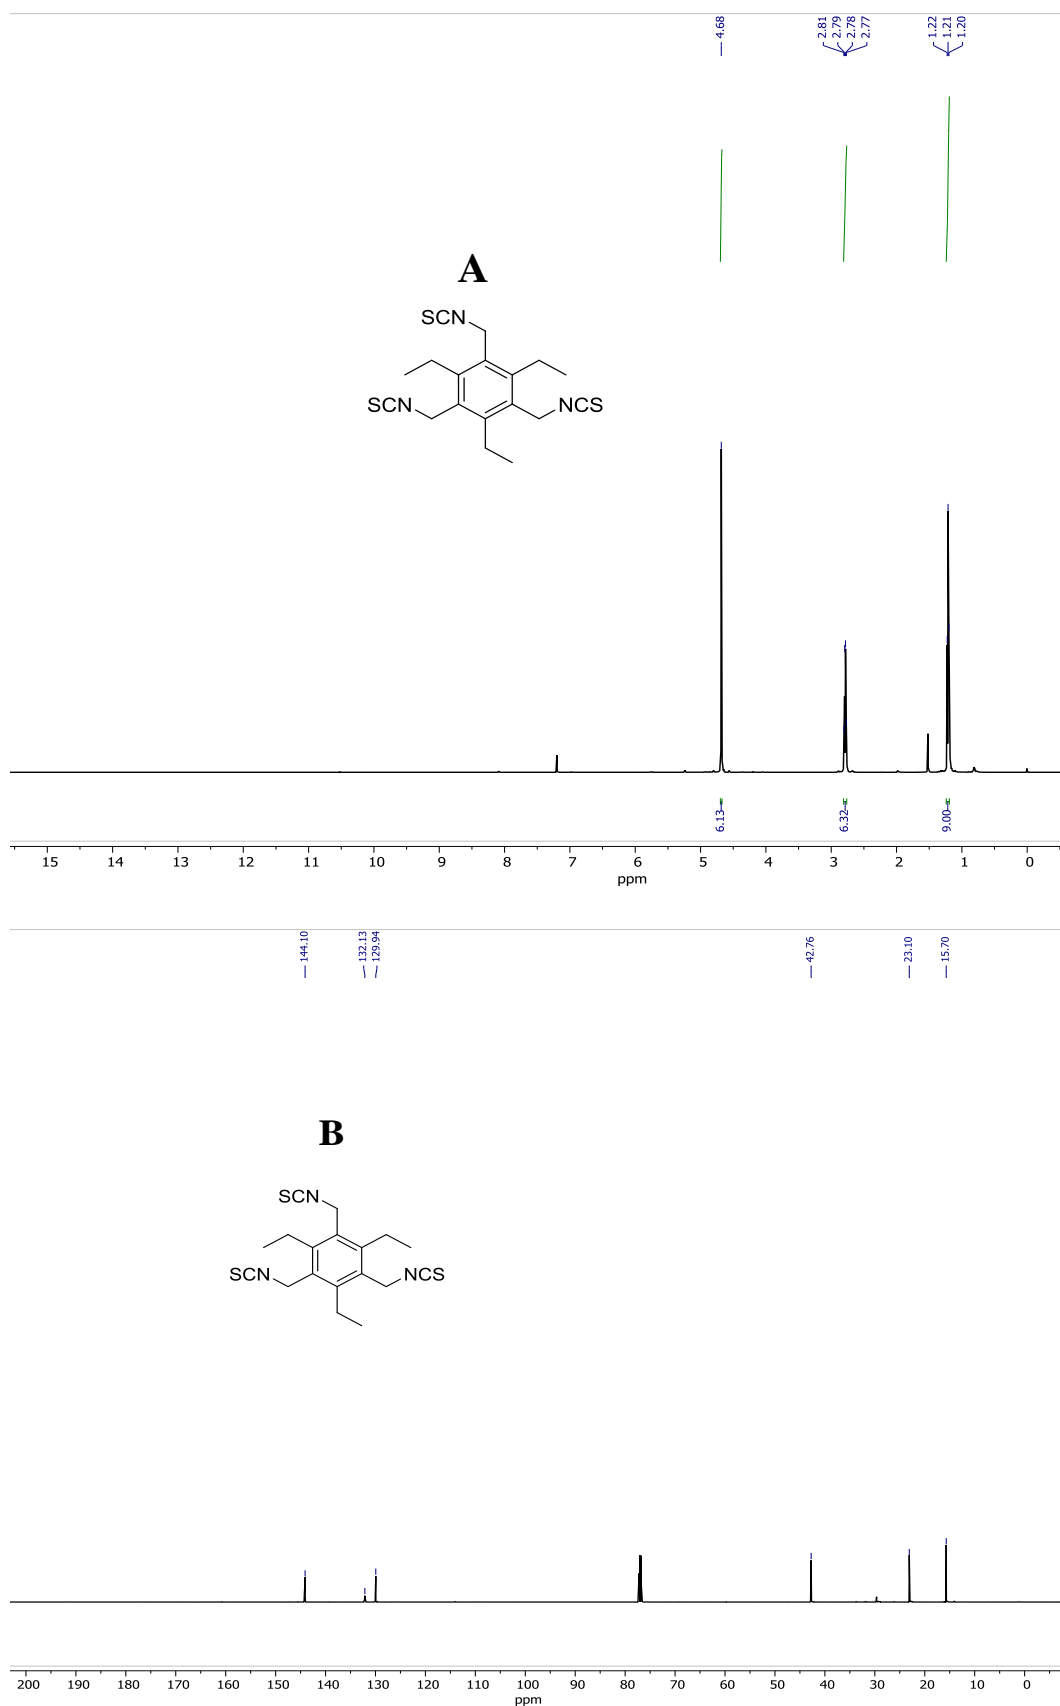

**Figure S32:**  $^1\text{H}$  NMR (A) and  $^{13}\text{C}$  NMR (B) spectra of 1,3,5-triethyl-2,4,6-tris(isothiocyatomethyl)benzene.



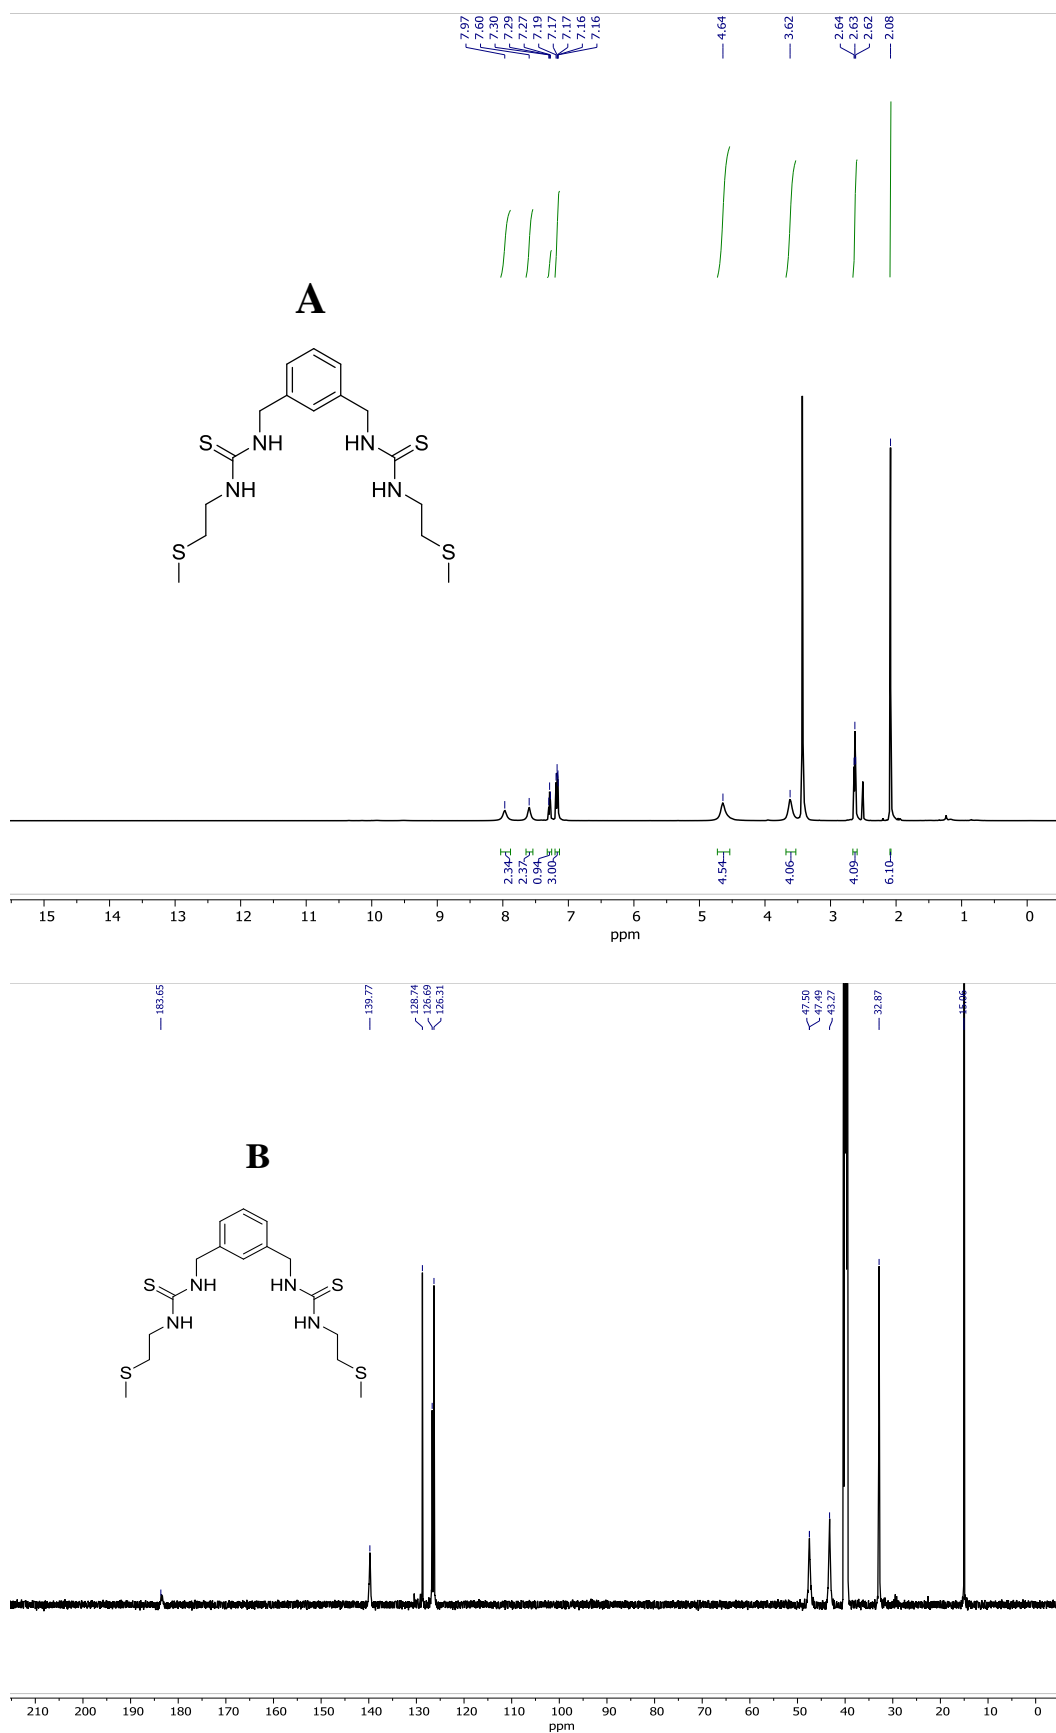

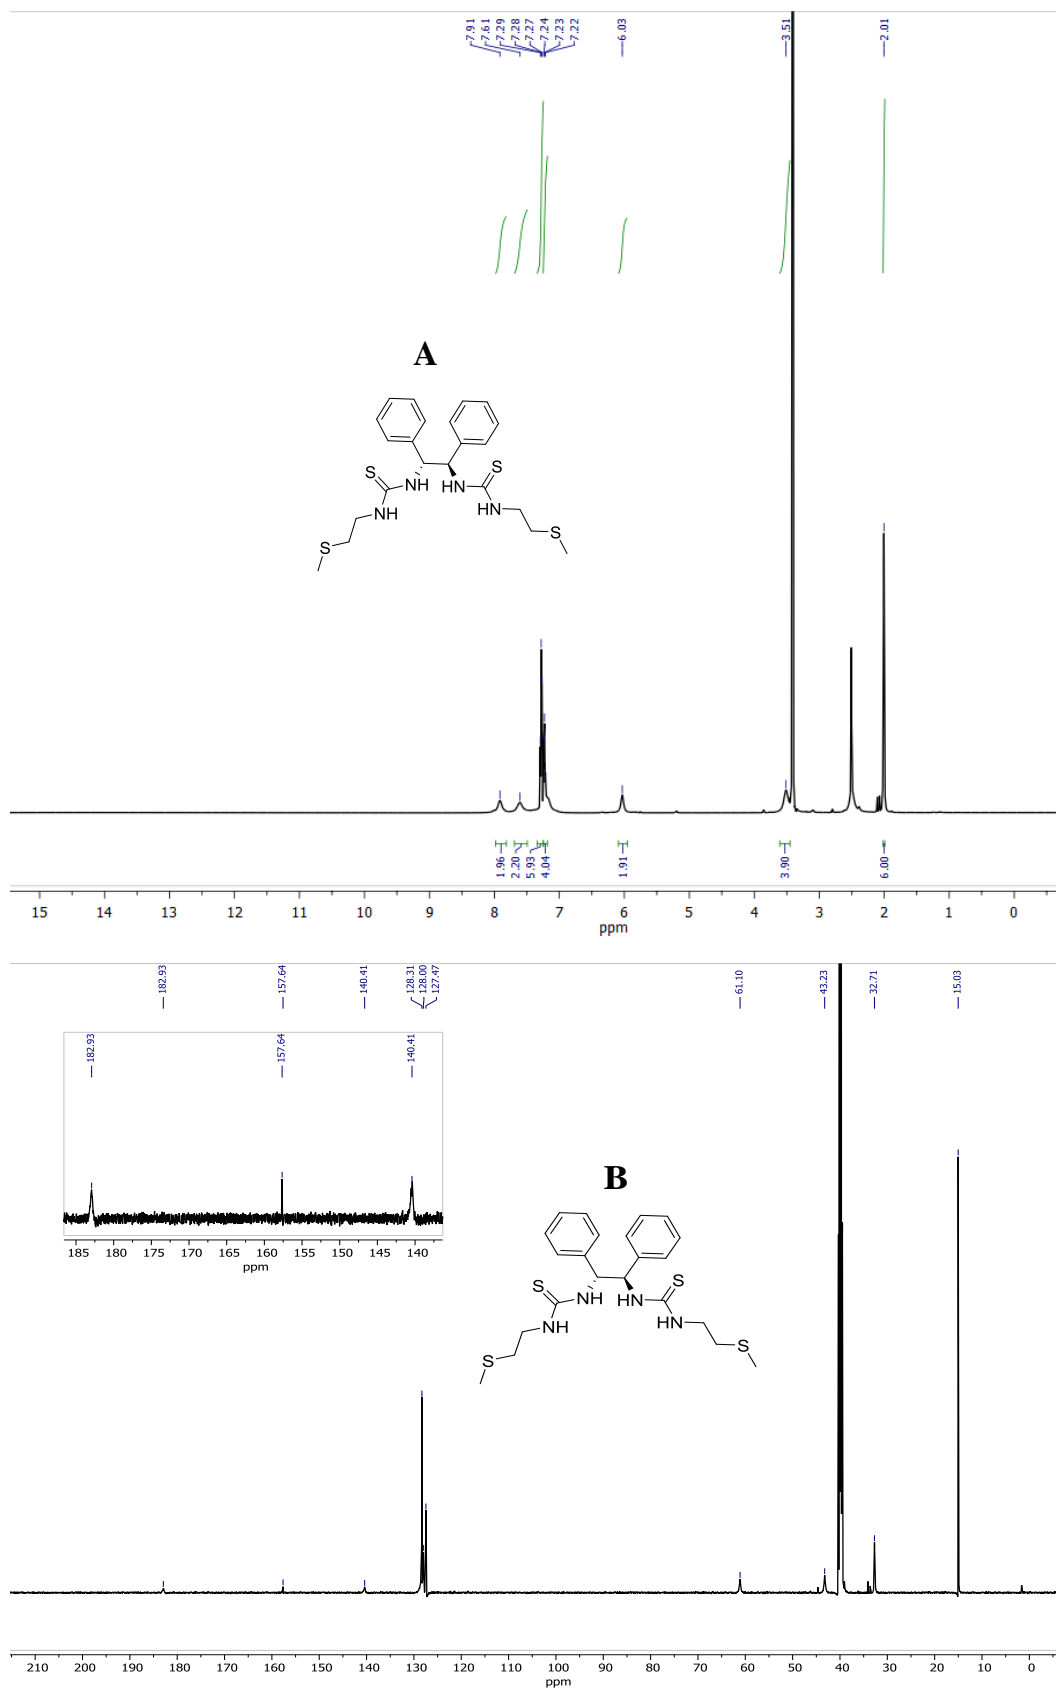

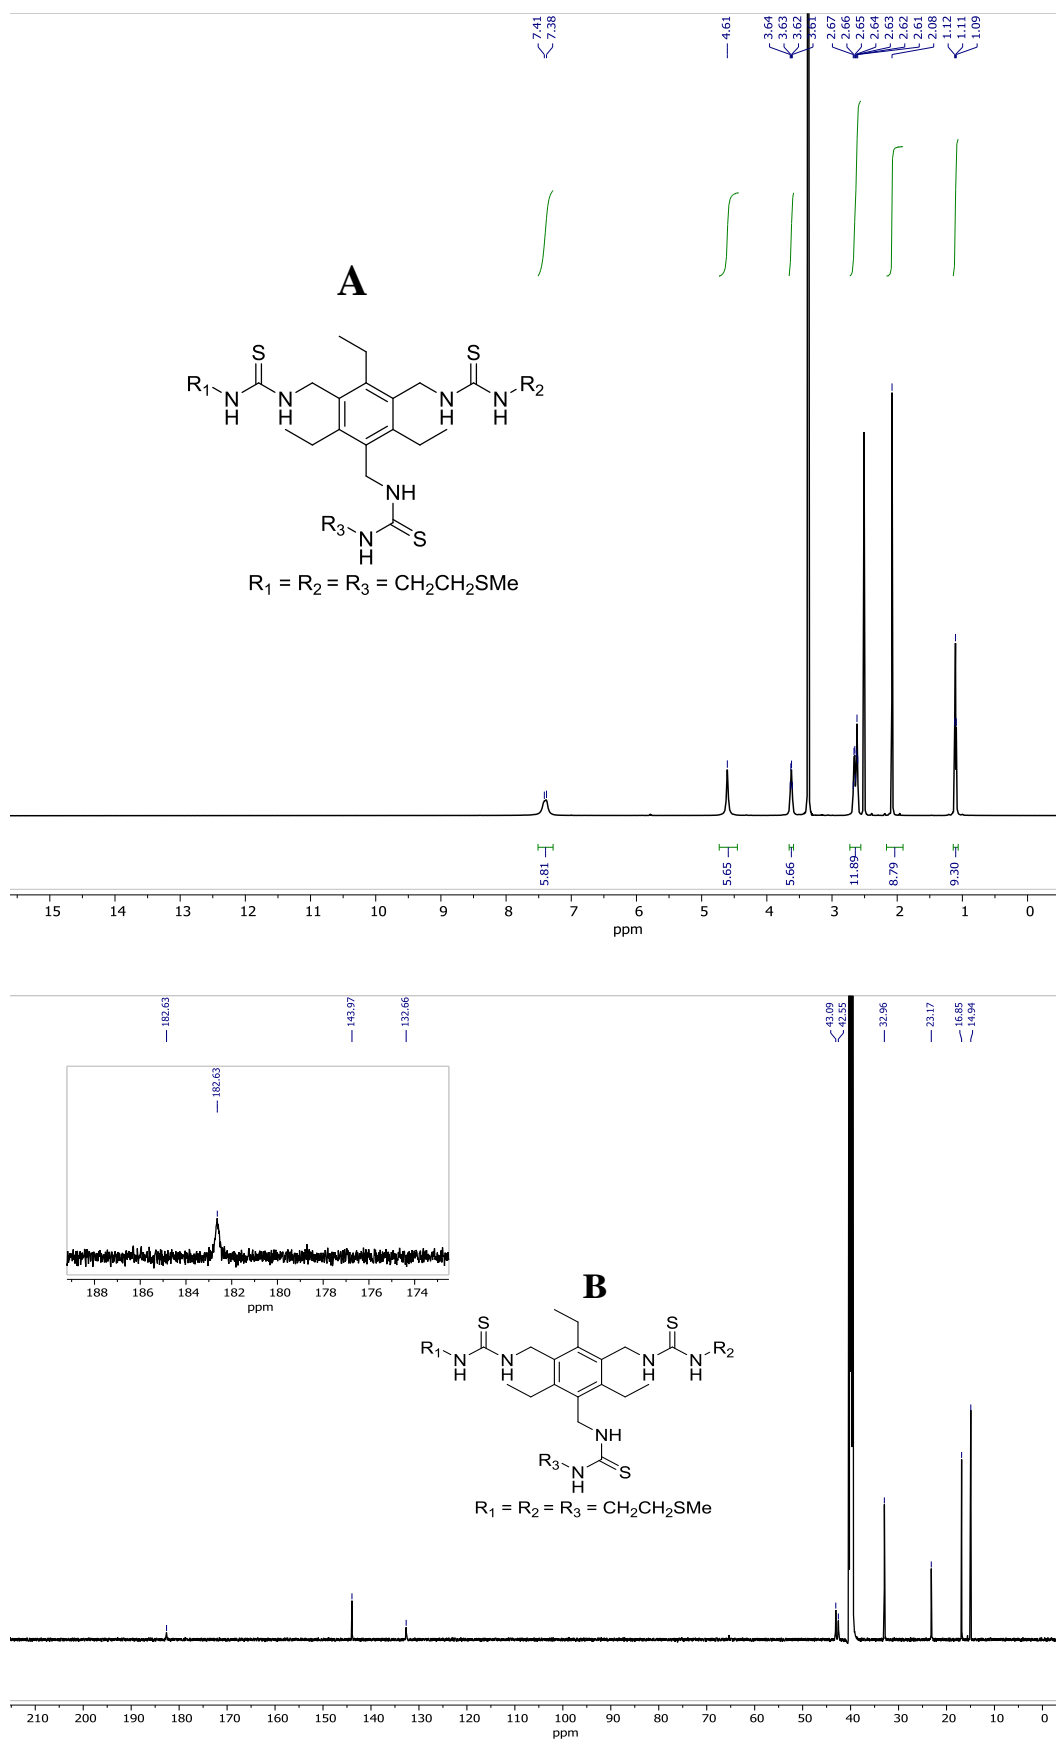

**Figure S35:**  $^1\text{H}$  NMR (A) and  $^{13}\text{C}$  NMR (B) spectra of compound **3**.

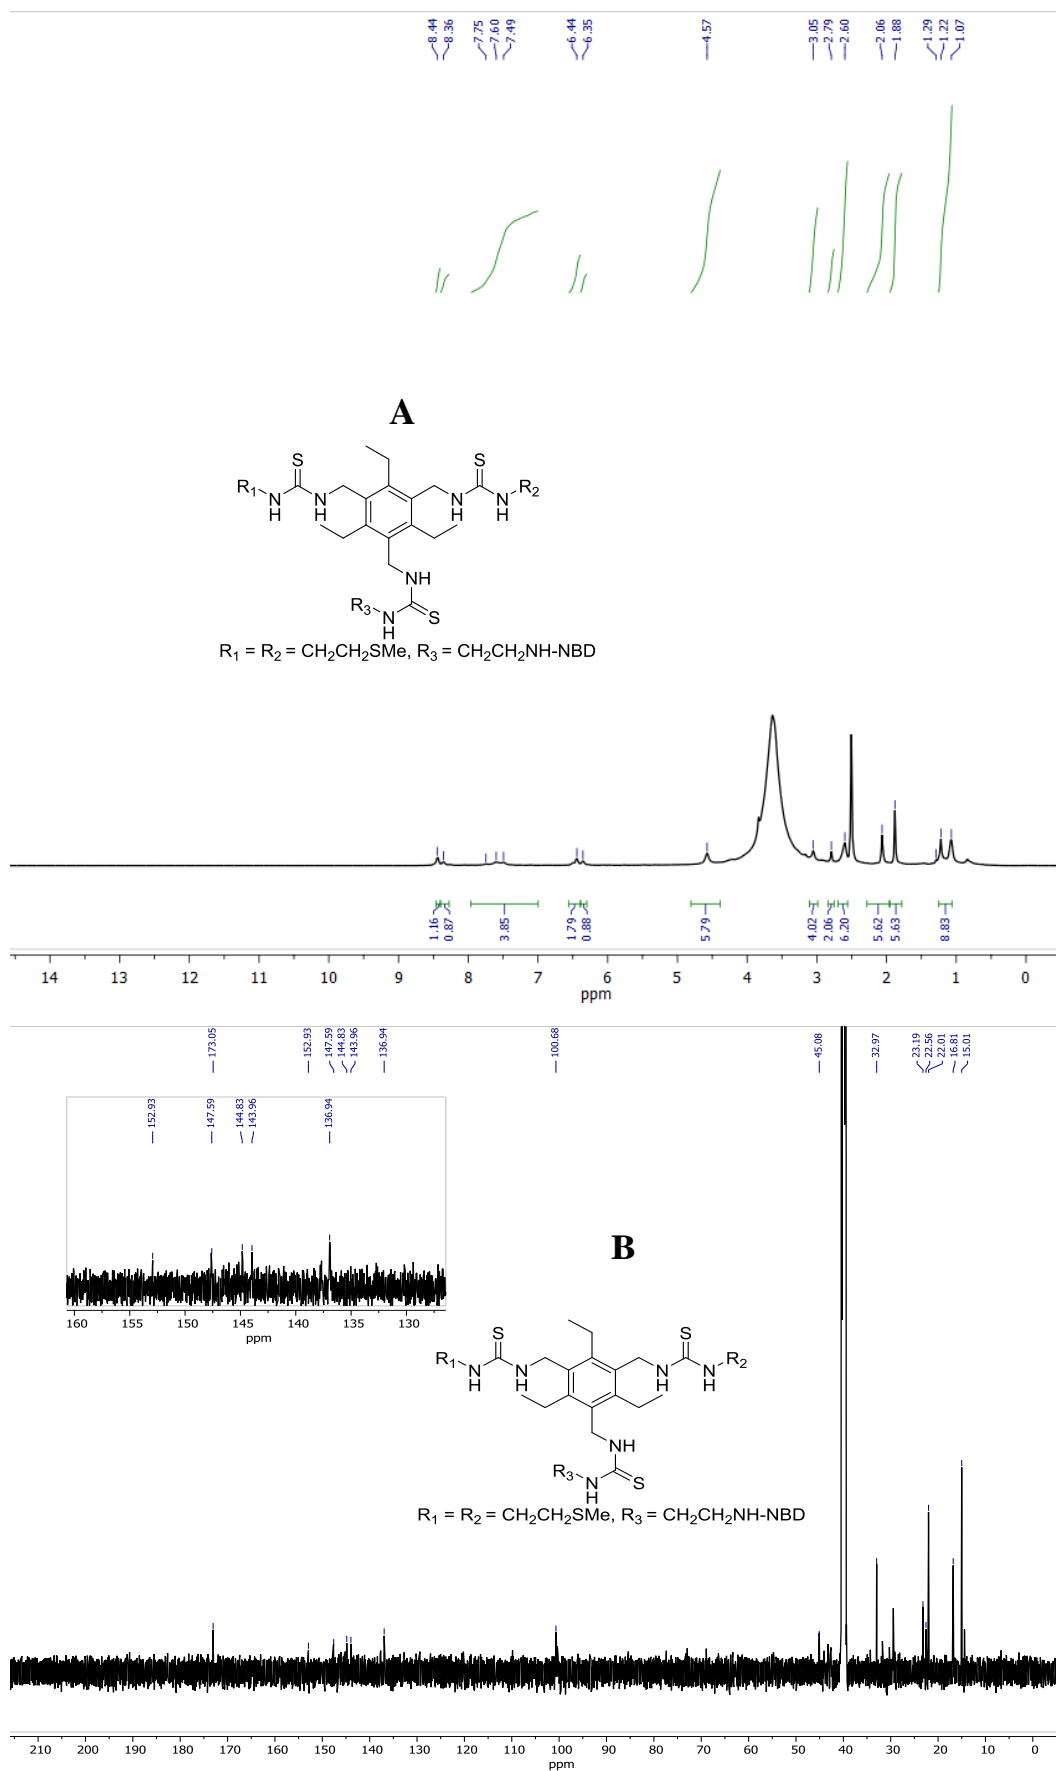

**Figure S36:**  $^1\text{H}$  NMR (A) and  $^{13}\text{C}$  NMR (B) spectra of compound **4**.

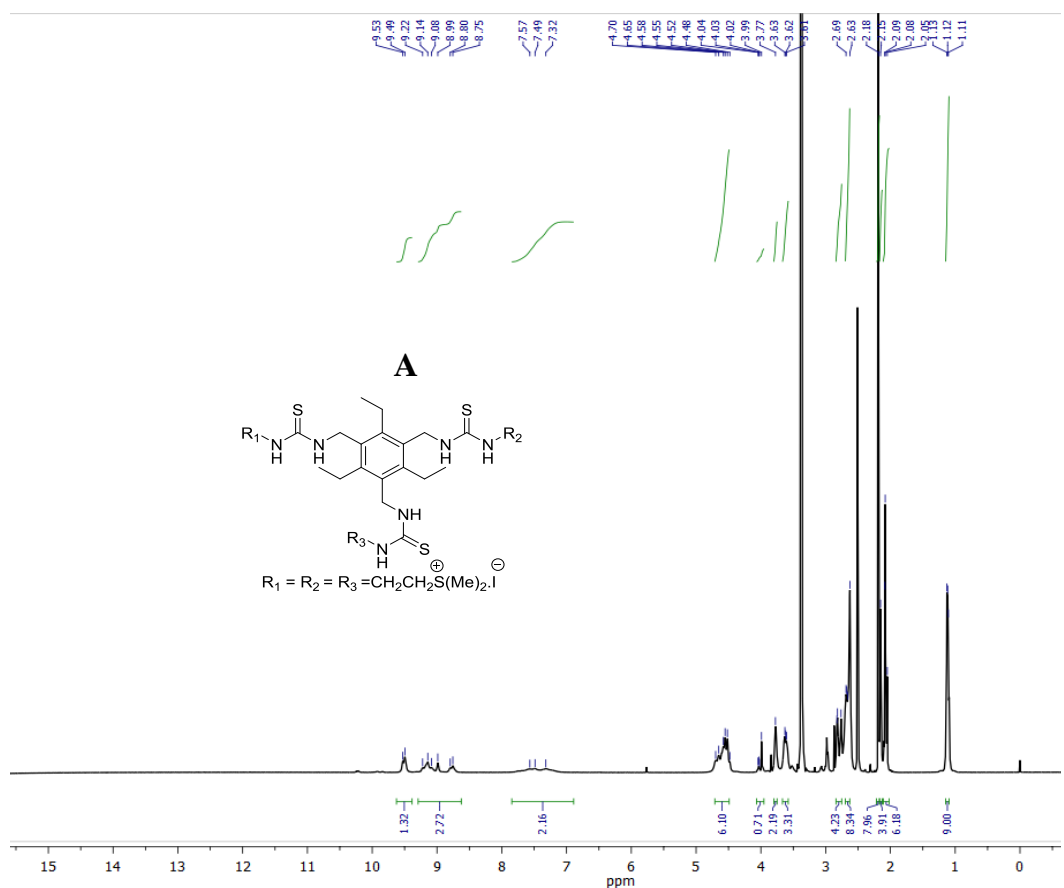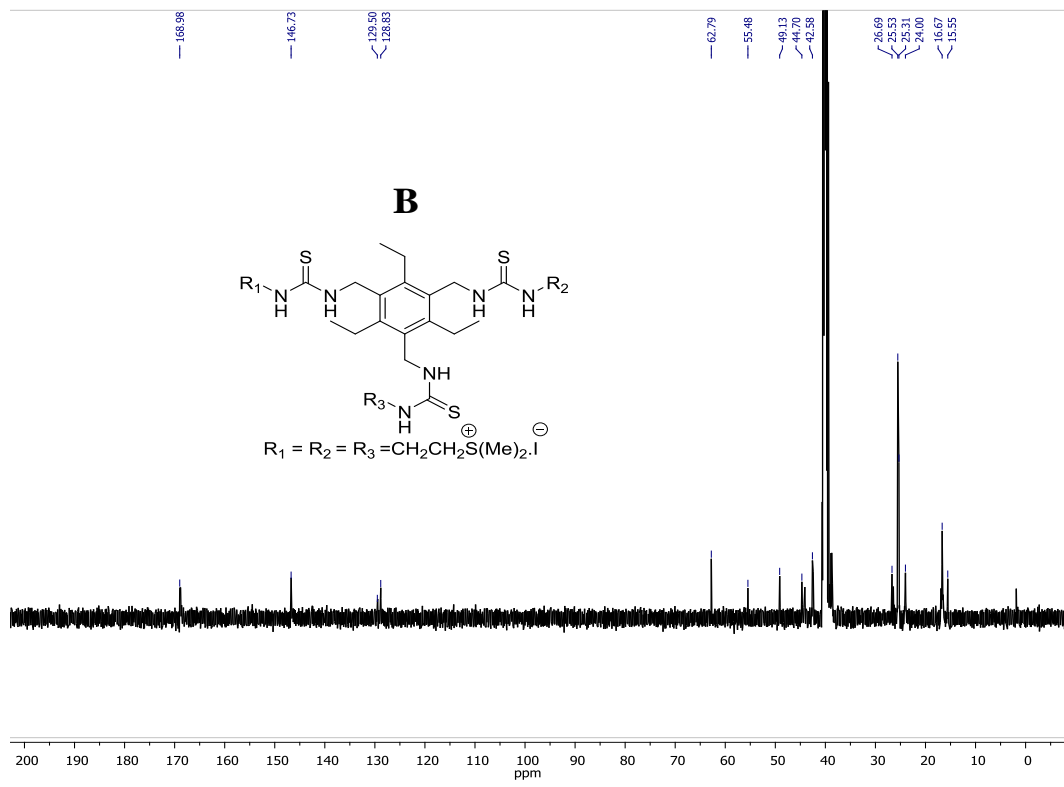

**Figure S37:**  $^1\text{H}$  NMR (A) and  $^{13}\text{C}$  NMR (B) spectra of compound **5**.

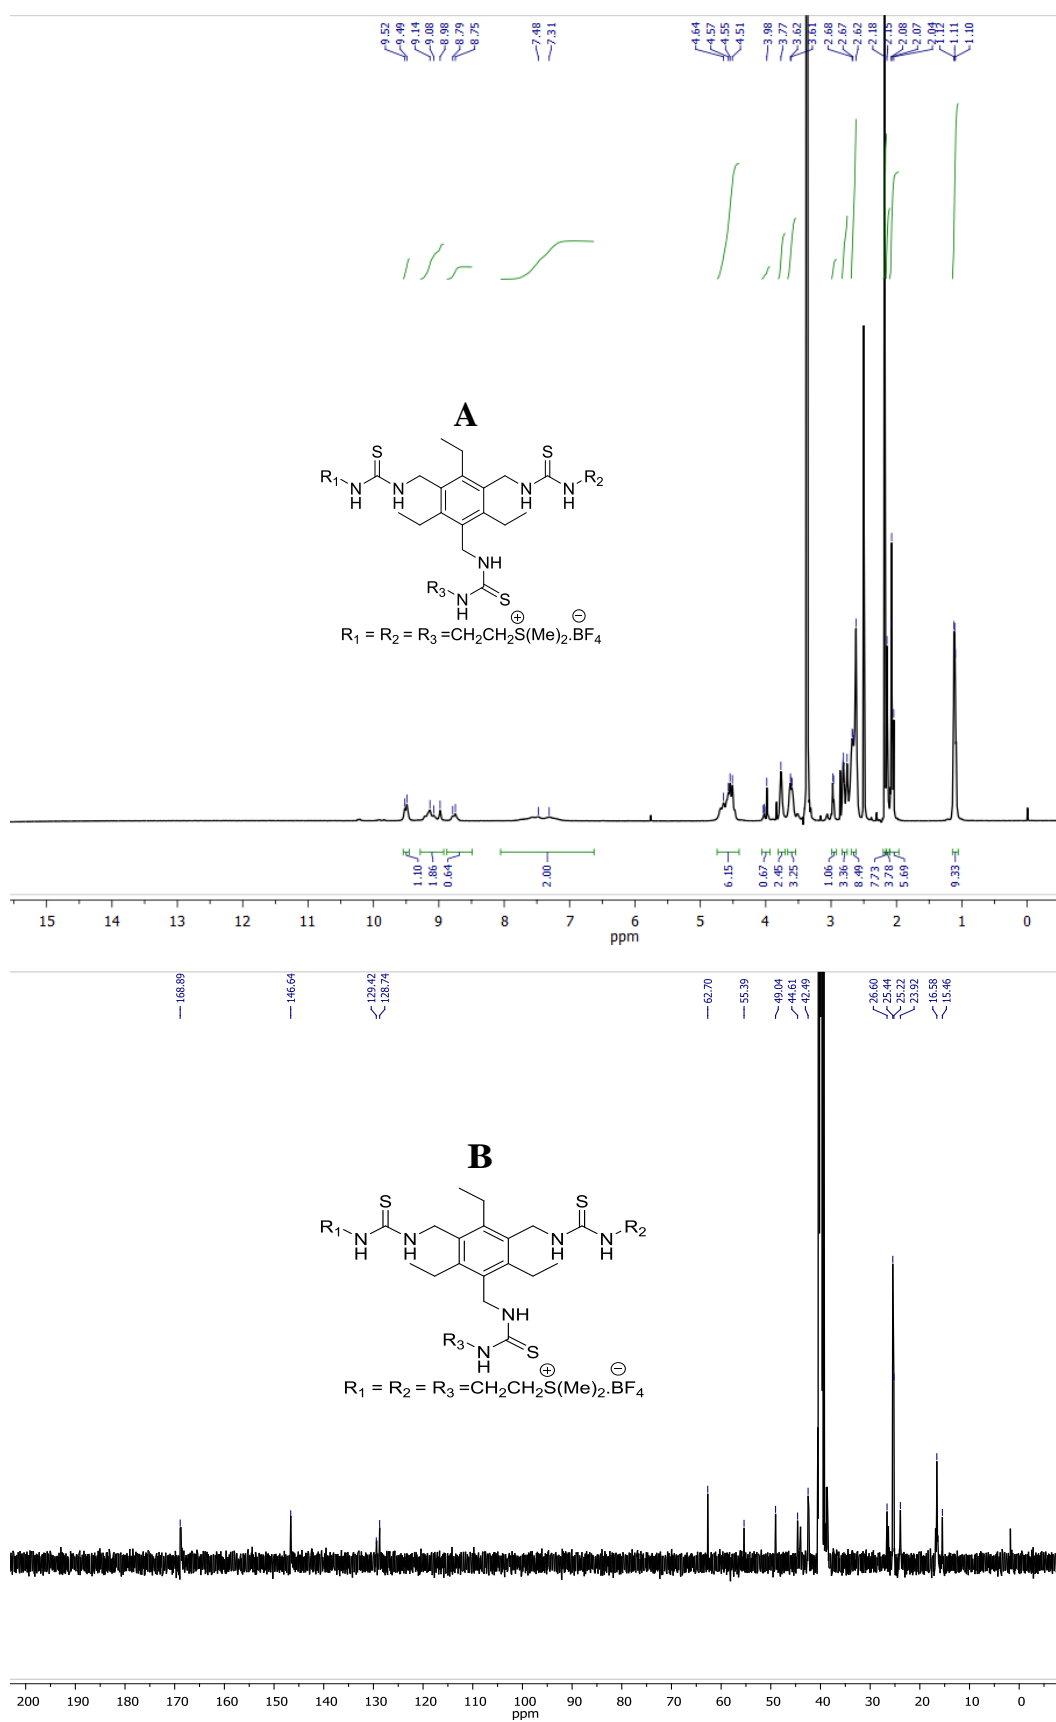

**Figure S38:**  $^1\text{H}$  NMR (A) and  $^{13}\text{C}$  NMR (B) spectra of compound **6**.

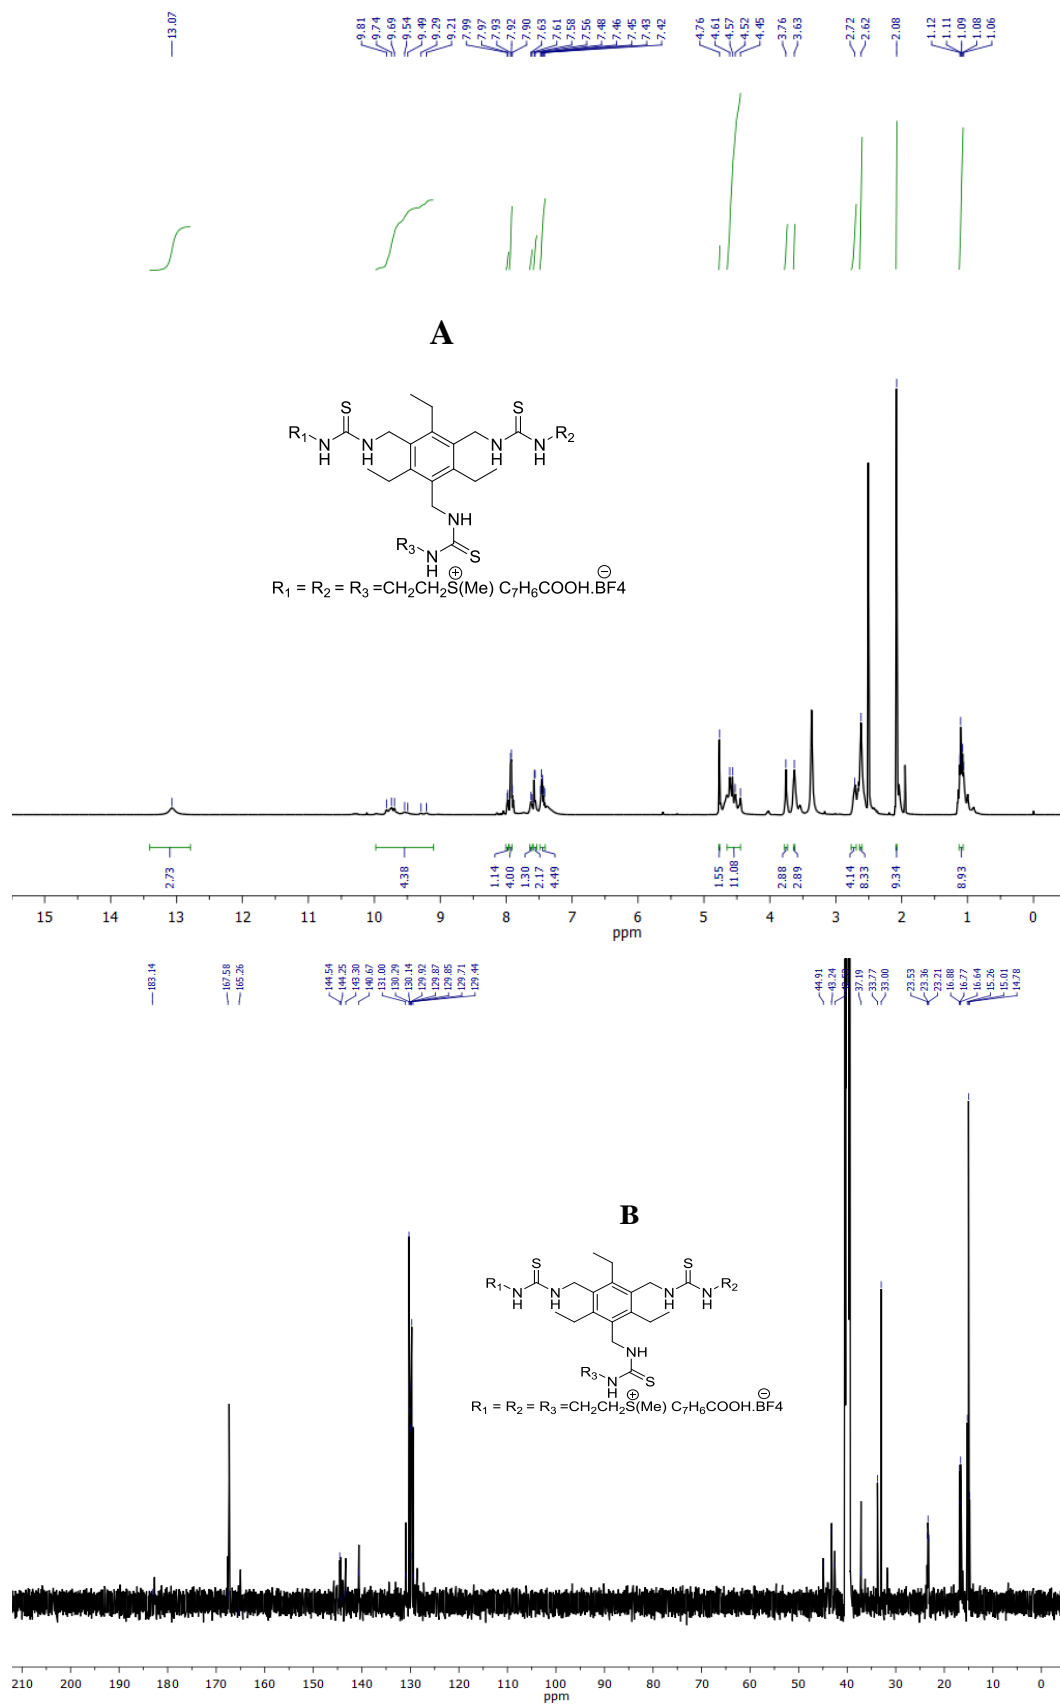

**Figure S39:**  $^1\text{H}$  NMR (A) and  $^{13}\text{C}$  NMR (B) spectra of compound **7**.

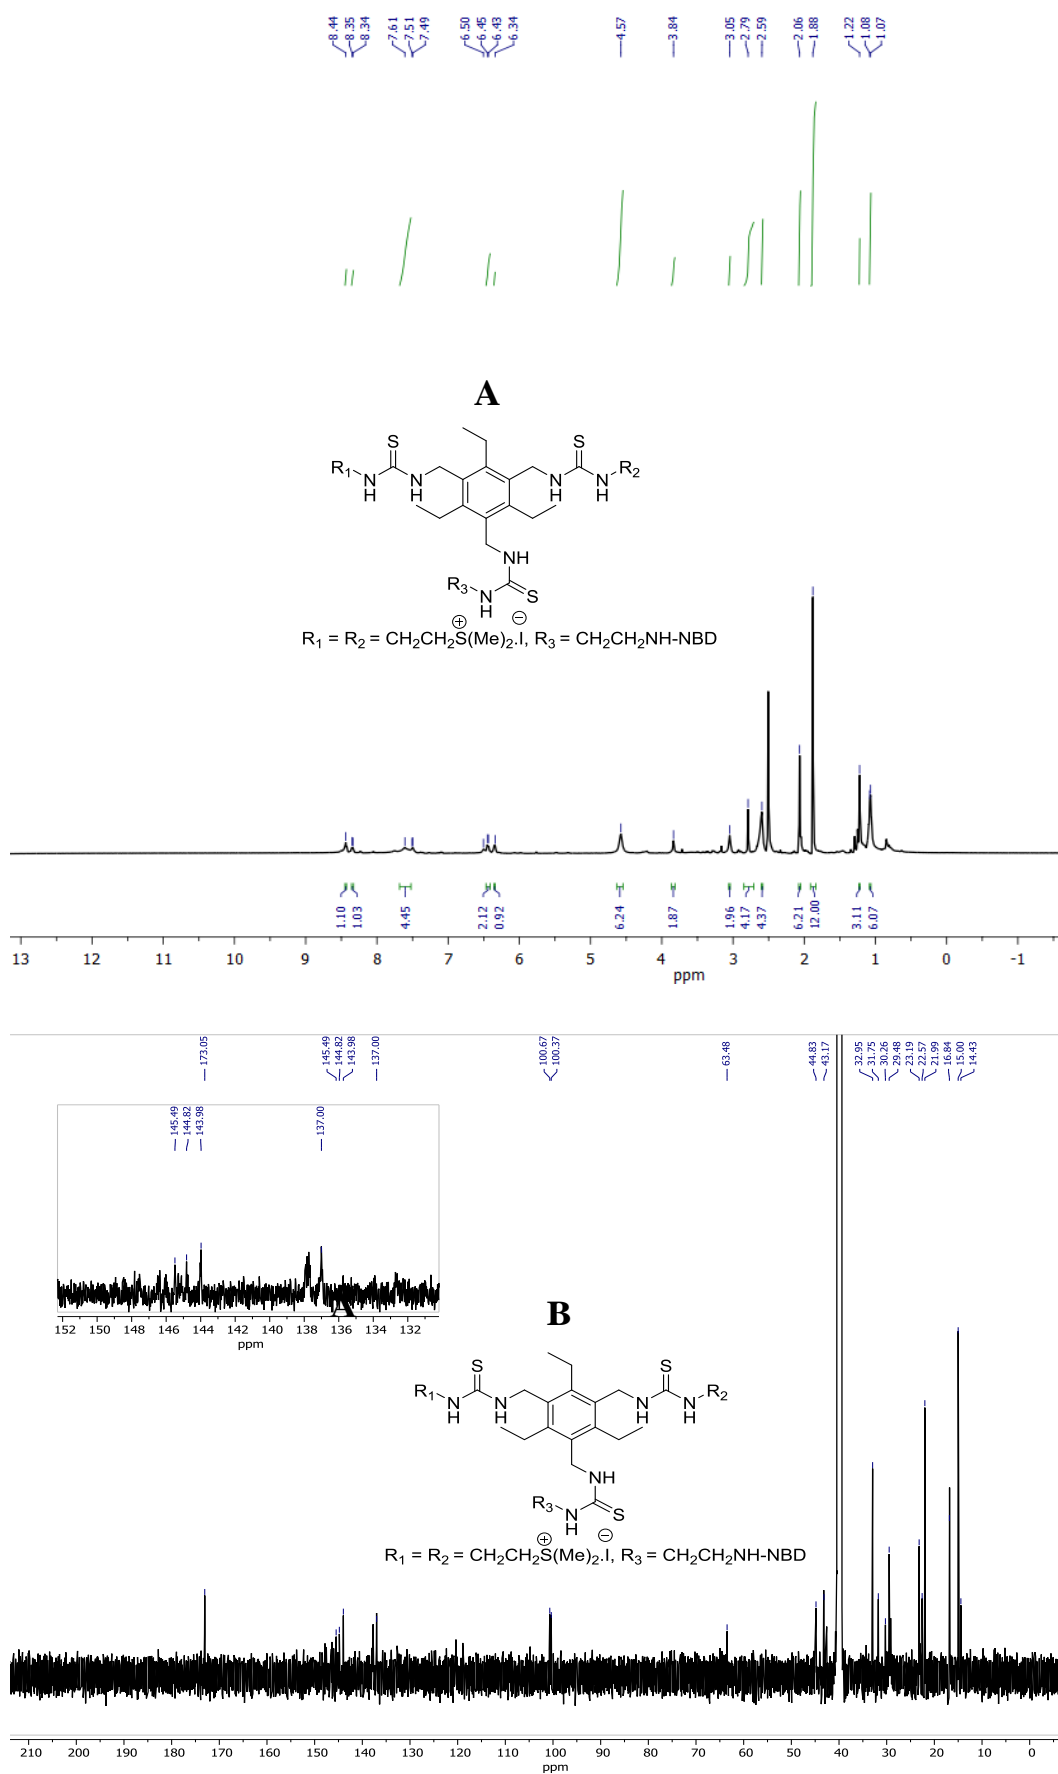

**Figure S40:**  $^1\text{H}$  NMR (A) and  $^{13}\text{C}$  NMR (B) spectra of compound **8**.



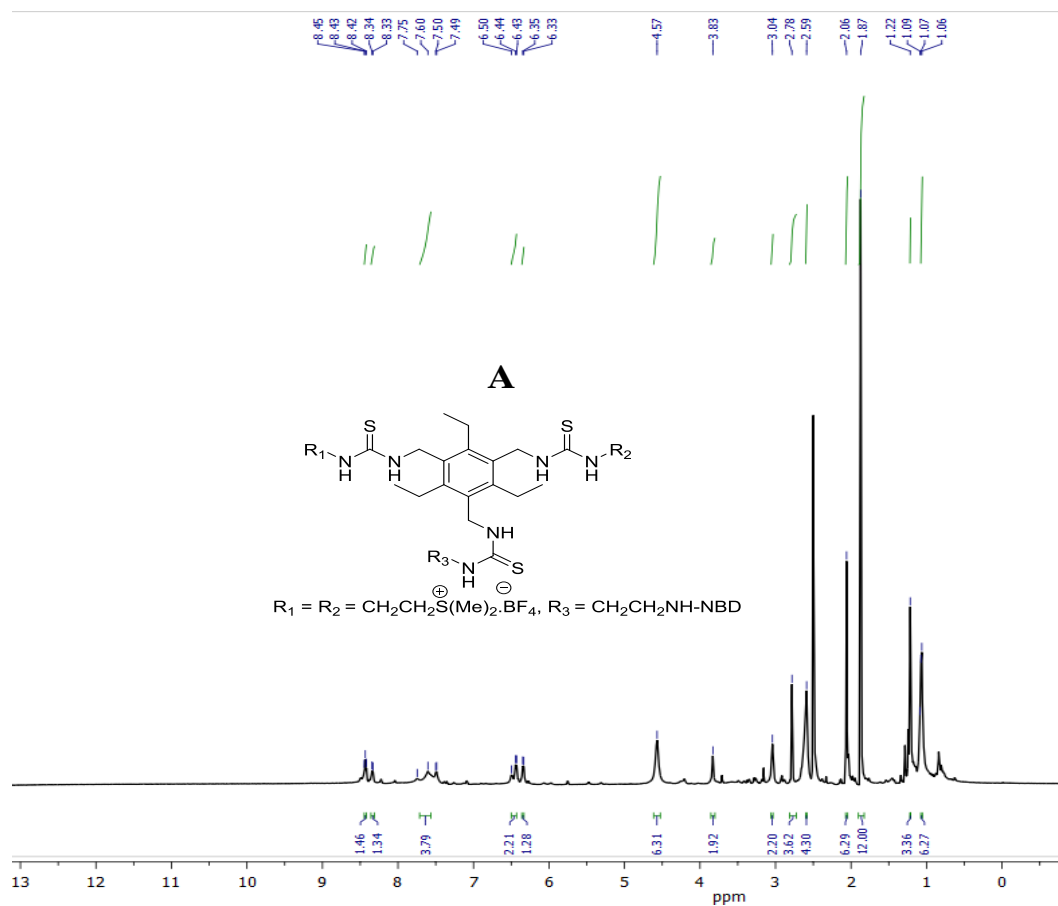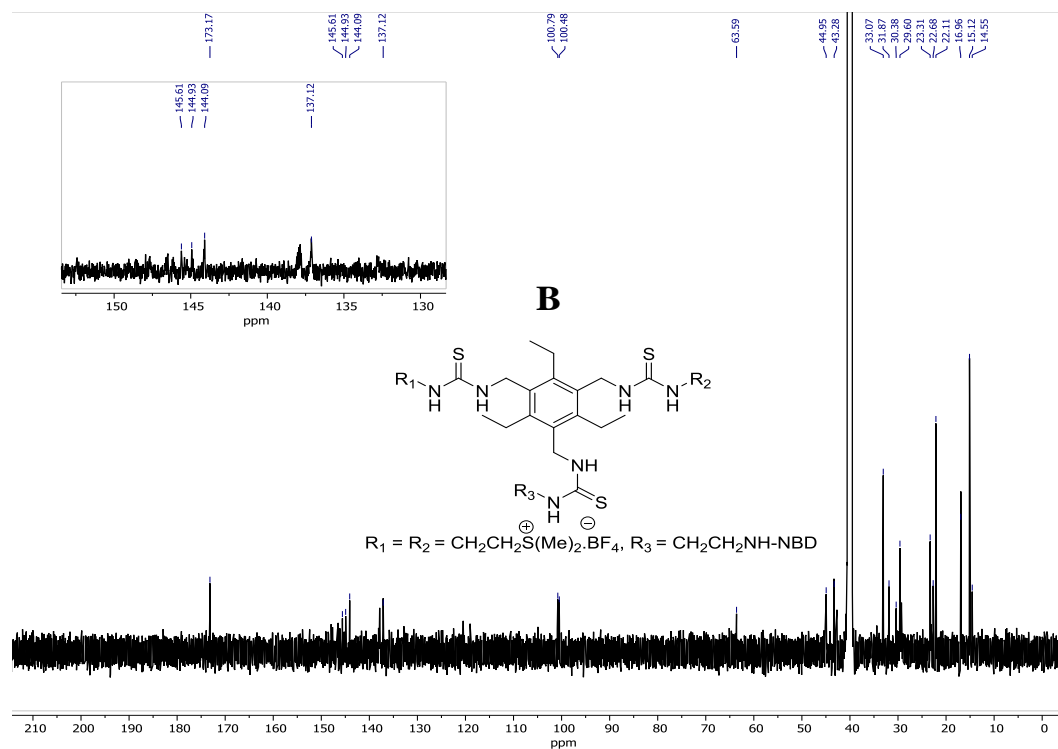

**Figure S41:**  $^1\text{H}$  NMR (A) and  $^{13}\text{C}$  NMR (B) spectra of compound **9**.

## 15. ES-MS Spectra of the Synthesized Compounds:

| Sample Name   | Position | Instrument Name | Instrument 1 | User Name | IRM Calibration Status | Success              |
|---------------|----------|-----------------|--------------|-----------|------------------------|----------------------|
| INJ Vol       | 20       | P2-B1           | Sample       |           |                        |                      |
| Data Filename | NA-267.d | ACQ Method      | Comment      |           | Acquired Time          | 1/29/2019 3:16:46 PM |

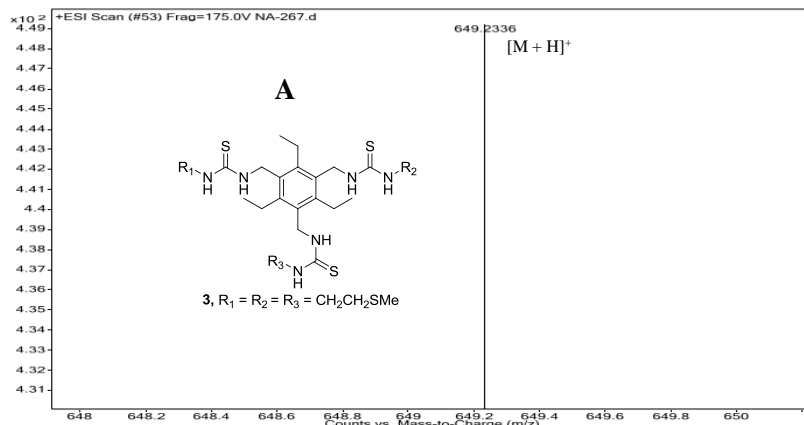

| Sample Name   | Position         | Instrument Name | Instrument 1 | User Name | IRM Calibration Status | Success             |
|---------------|------------------|-----------------|--------------|-----------|------------------------|---------------------|
| INJ Vol       | 20               | P1-F3           | Sample       |           |                        |                     |
| Data Filename | NA-349-NBD-TAG.d | ACQ Method      | Comment      |           | Acquired Time          | 2/1/2019 7:22:35 PM |

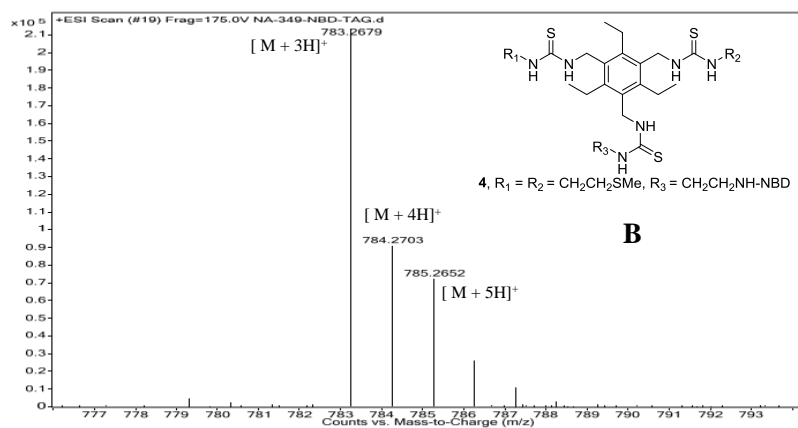

| Sample Name   | Position             | Instrument Name | Instrument 1 | User Name | IRM Calibration Status | Success              |
|---------------|----------------------|-----------------|--------------|-----------|------------------------|----------------------|
| INJ Vol       | 20                   | P1-D11          | Sample       |           |                        |                      |
| Data Filename | NA-SALT-1-WITHOUT AG | ACQ Method      | Comment      |           | Acquired Time          | 1/16/2019 1:01:32 PM |

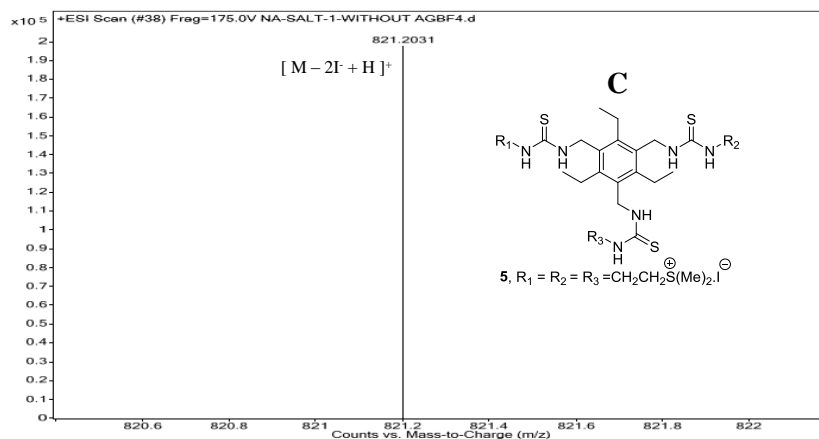

Figure S42: ES-MS spectra of compound **3** (A), **4** (B) and **5** (C).

|               |                   |             |                    |                 |              |                        |                      |
|---------------|-------------------|-------------|--------------------|-----------------|--------------|------------------------|----------------------|
| Sample Name   | NA-SALT-1-AGBF4   | Position    | P1-D10             | Instrument Name | Instrument 1 | User Name              |                      |
| Inj Vol       | 20                | InjPosition |                    | SampleType      | Sample       | IRM Calibration Status | Success              |
| Data Filename | NA-SALT-1-AGBF4.d | ACQ Method  | ESI ALS 100-2000.m | Comment         |              | Acquired Time          | 1/16/2019 1:37:46 PM |

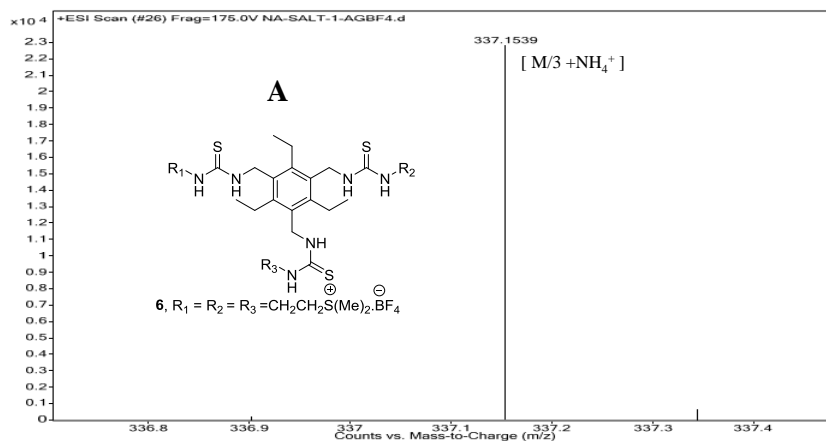

|               |            |             |                    |                 |              |                        |                      |
|---------------|------------|-------------|--------------------|-----------------|--------------|------------------------|----------------------|
| Sample Name   | NA-SALT2   | Position    | P1-D3              | Instrument Name | Instrument 1 | User Name              |                      |
| Inj Vol       | 20         | InjPosition |                    | SampleType      | Sample       | IRM Calibration Status | Success              |
| Data Filename | NA-SALT2.d | ACQ Method  | ESI ALS 200-2000.m | Comment         |              | Acquired Time          | 1/7/2019 11:18:13 AM |

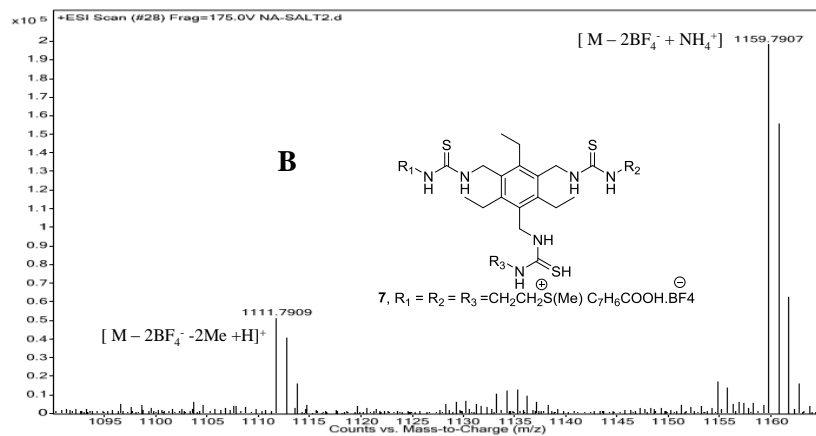

|               |                 |             |                    |                 |              |                        |                     |
|---------------|-----------------|-------------|--------------------|-----------------|--------------|------------------------|---------------------|
| Sample Name   | SAMPLE 2        | Position    | P1-C1              | Instrument Name | Instrument 1 | User Name              |                     |
| Inj Vol       | 20              | InjPosition |                    | SampleType      | Sample       | IRM Calibration Status | Success             |
| Data Filename | NBD-TAG-SALT1.d | ACQ Method  | ESI ALS 200-2000.m | Comment         |              | Acquired Time          | 2/6/2019 3:36:35 PM |

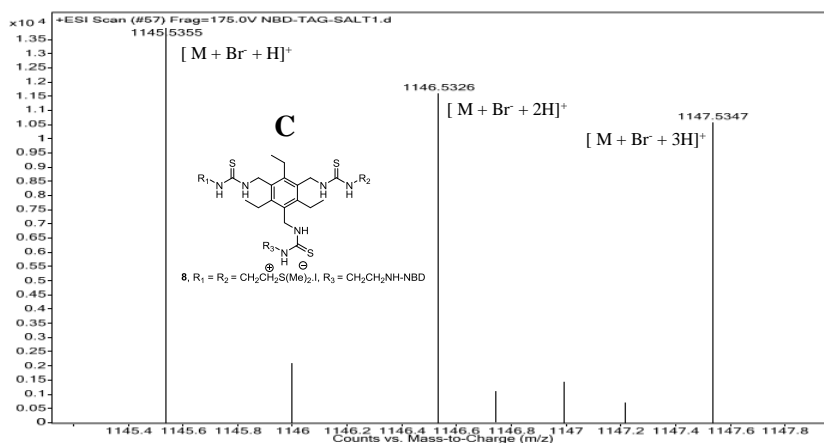

**Figure S43:** ES-MS spectra of compound **6** (A), **7** (B) and **8** (C).

| Sample Name        | Position    | Instrument Name    | Instrument 1 | User Name              | Success             |
|--------------------|-------------|--------------------|--------------|------------------------|---------------------|
| SAMPLE 3           | P1-F7       | ESI ALS 200-2000.m | Sample       | IRM Calibration Status | 2/7/2019 3:12:11 PM |
| Inj Vol            | InjPosition | SampleType         | Comment      | Acquired Time          |                     |
| 20                 |             |                    |              |                        |                     |
| Data Filename      | ACQ Method  |                    |              |                        |                     |
| NBD-TAG-SALT-7-R.d |             |                    |              |                        |                     |

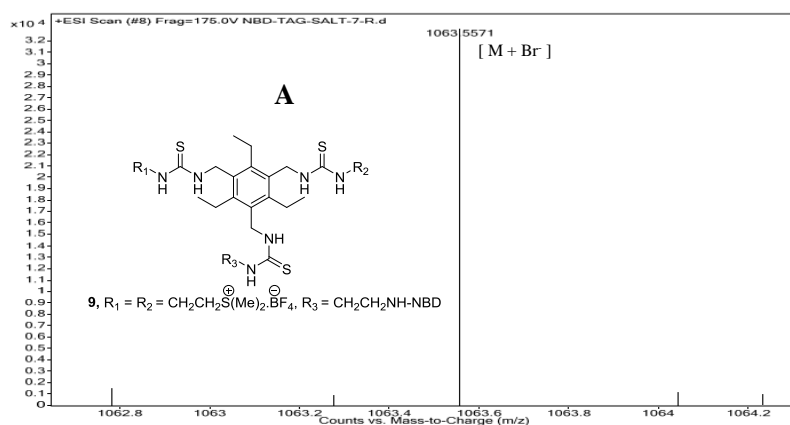

**Figure S44:** ES-MS spectra of compound **9**.

## 16. MALDI-TOF Analysis of the Compounds

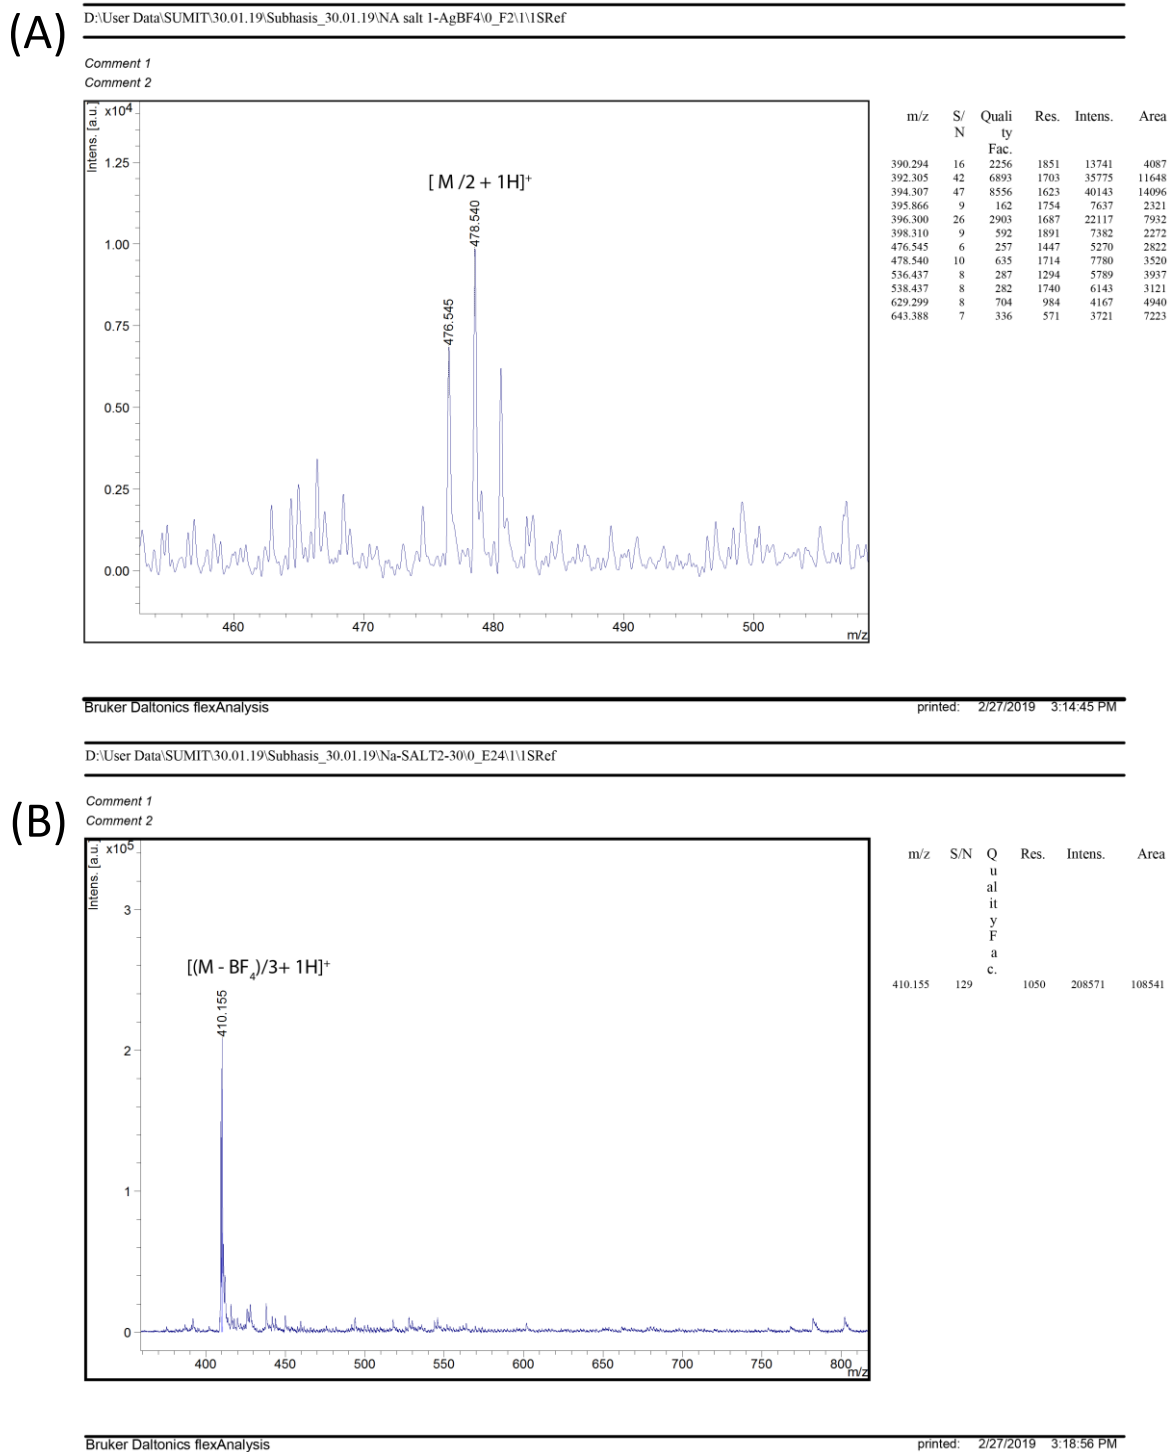

**Figure S45:** MALDI-TOF analysis of compound **6** (A) and **7** (B).

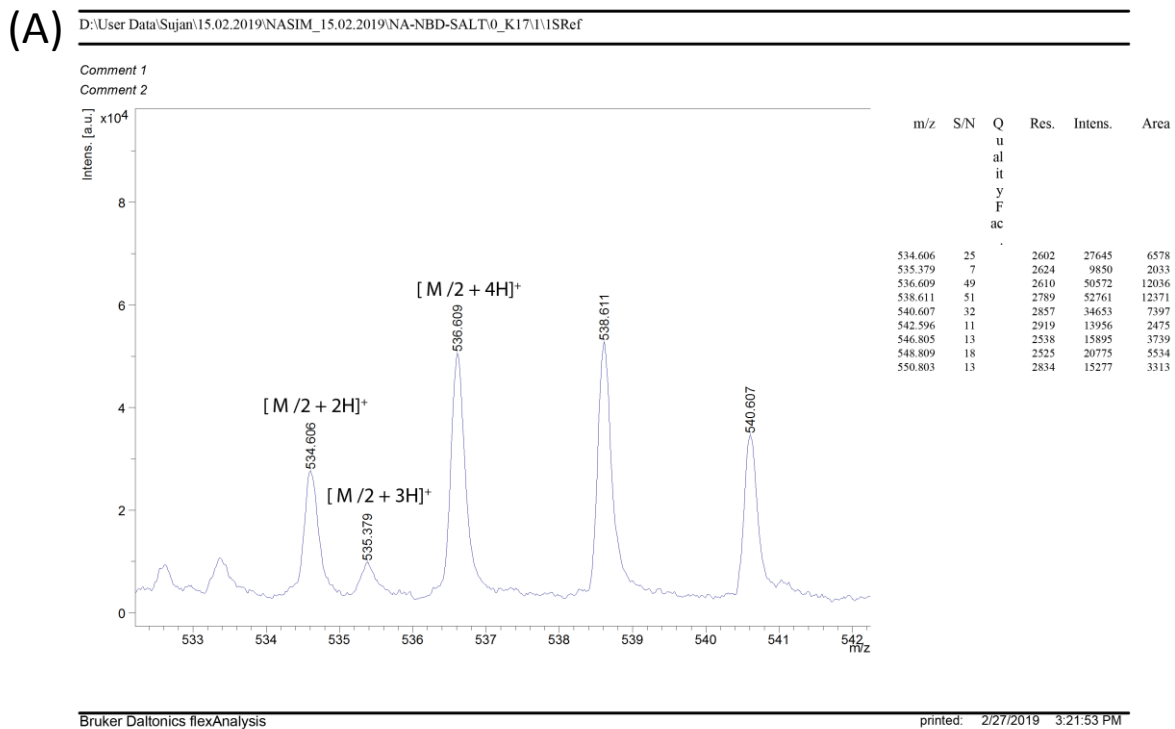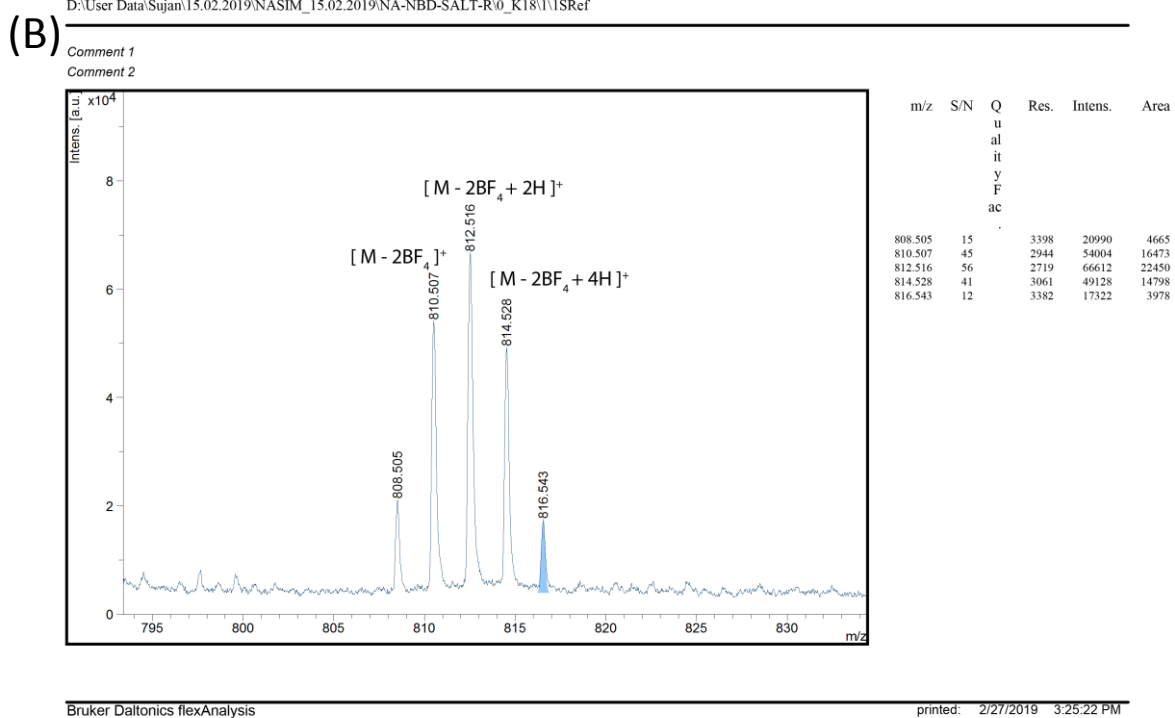

**Figure S46:** MALDI-TOF analysis of compound **8** (A) and **9** (B).

## 17. References

1. J. K. Moon, J. R. Kim, Y. J. Ahn and T. Shibamoto, *J. Agcr. Food Chem.*, 2010, **58**, 6672-6677.
2. B. Garcia-Reyes, L. Witt, B. Jansen, E. Karasu, T. Gehring, J. Leban, D. Henne-Bruns, C. Pichlo, E. Brunstein, U. Baumann, F. Wessler, B. Rathmer, D. Schade, C. Peifer and U. Knippschild, *J. Med. Chem.*, 2018, **61**, 4087-4102.
3. H. Valkenier, C. M. Dias, K. L. P. Goff, O. Jurcek, R. Puttreddy, K. Rissanen and A. P. Davis, *Chem. Comm.*, 2015, **51**, 14235-14238.
4. M. Filice, O. Romero, J. M. Guisan and J. M. Palomo, *Org. Biomol. Chem.*, 2011, **9**, 5535-5540.
5. K. K. Laali, J. H. Chun, T. Okazaki, S. Kumar, G. L. Borosky and C. Swartz, *J. Org. Chem.*, 2007, **72**, 8383-8393.
6. G. F. Gu, H. Liu and B. M. Pinto, *Carbohydr Res.*, 2007, **342**, 139-139.
7. N. Akhtar, A. Saha, V. Kumar, N. Pradhan, S. Panda, S. Morla, S. Kumar and D. Manna, *Acs Appl. Mater. Inter.*, 2018, **10**, 33803-33813.
8. M. J. Hynes, *J. Chem. Soc. Dalton Transac.*, 1993, 311-312.
9. T. Saha, M. S. Hossain, D. Saha, M. Lahiri and P. Talukdar, *J. Am. Chem. Soc.*, 2016, **138**, 7558-7567.
10. T. Saha, A. Gautam, A. Mukherjee, M. Lahiri and P. Talukdar, *J. Am. Chem. Soc.*, 2016, **138**, 16443-16451.
11. C. Y. Zhou, H. X. Wu and N. K. Devaraj, *Chem. Sci.*, 2015, **6**, 4365-4372.
